# Supplementary material for: Morphological Variations inTamarindus indicaLINN. Fruits and Seed Traits in the Different Agroecological Zones of Uganda
Source: Hindawi journal article supplement (doi:10.1155/2018/8469156), 2018-12-11
Supplement: f1 [file 8469156.f1.pdf]

1=Naka 1=Wild  
2=Soroti 2=Onfarm  
3=moyo

| District | Land Use | Tree No. | Canopy | Fruit No. | Fruit Length (cm) | Fruit Breath (cm) | Total Fruit Wt (g) | Seed no. | Seed Weight (g) | Aver Seed Wt (g) | Pulp Weight (g) |
|----------|----------|----------|--------|-----------|-------------------|-------------------|--------------------|----------|-----------------|------------------|-----------------|
| 1        | 2        | 1        | 1      | 1         | 8.30              | 1.90              | 19.34              | 5        | 7.52            | 1.50             | 2.77            |
| 1        | 2        | 1        | 1      | 2         | 11.60             | 2.39              | 23.37              | 5        | 7.22            | 1.44             | 5.83            |
| 1        | 2        | 1        | 1      | 3         | 11.30             | 2.34              | 20.03              | 5        | 7.12            | 1.42             | 5.35            |
| 1        | 2        | 1        | 1      | 4         | 11.80             | 2.15              | 15.40              | 3        | 4.35            | 1.45             | 3.62            |
| 1        | 2        | 1        | 1      | 5         | 13.00             | 2.21              | 29.09              | 6        | 7.67            | 1.28             | 4.99            |
| 1        | 2        | 1        | 1      | 6         | 10.90             | 2.50              | 24.09              | 3        | 4.12            | 1.37             | 4.46            |
| 1        | 2        | 1        | 1      | 7         | 9.80              | 2.08              | 12.80              | 3        | 4.14            | 1.38             | 3.60            |
| 1        | 2        | 1        | 1      | 8         | 11.00             | 2.29              | 21.68              | 5        | 6.82            | 1.36             | 3.69            |
| 1        | 2        | 1        | 2      | 1         | 18.40             | 2.51              | 45.60              | 10       | 15.60           | 1.56             | 2.23            |
| 1        | 2        | 1        | 2      | 2         | 11.70             | 2.33              | 24.90              | 7        | 9.87            | 1.41             | 3.12            |
| 1        | 2        | 1        | 2      | 3         | 13.30             | 2.29              | 22.52              | 7        | 8.48            | 1.21             | 8.56            |
| 1        | 2        | 1        | 2      | 4         | 12.20             | 2.35              | 23.13              | 4        | 5.03            | 1.26             | 6.00            |
| 1        | 2        | 1        | 2      | 5         | 5.70              | 2.04              | 9.81               | 3        | 2.72            | 0.91             | 7.00            |
| 1        | 2        | 1        | 2      | 6         | 12.60             | 2.29              | 27.08              | 4        | 6.99            | 1.75             | 6.33            |
| 1        | 2        | 1        | 2      | 7         | 8.40              | 2.14              | 12.59              | 7        | 10.37           | 1.48             | 3.03            |
| 1        | 2        | 1        | 2      | 8         | 6.80              | 2.37              | 9.86               | 3        | 4.47            | 1.49             | 6.80            |
| 1        | 2        | 1        | 3      | 1         | 12.00             | 2.14              | 10.01              | 1        | 1.06            | 1.06             | 2.23            |
| 1        | 2        | 1        | 3      | 2         | 8.80              | 2.60              | 15.70              | 3        | 5.87            | 1.96             | 3.12            |
| 1        | 2        | 1        | 3      | 3         | 13.70             | 2.36              | 21.61              | 4        | 5.84            | 1.46             | 3.97            |
| 1        | 2        | 1        | 3      | 4         | 9.70              | 2.14              | 21.66              | 5        | 11.16           | 2.23             | 5.08            |
| 1        | 2        | 1        | 3      | 5         | 13.20             | 2.34              | 30.10              | 5        | 6.85            | 1.37             | 2.57            |
| 1        | 2        | 1        | 3      | 6         | 11.20             | 2.24              | 12.57              | 3        | 5.16            | 1.72             | 3.20            |
| 1        | 2        | 1        | 3      | 7         | 7.70              | 1.79              | 18.37              | 2        | 3.17            | 1.59             | 1.02            |
| 1        | 2        | 1        | 3      | 8         | 10.40             | 2.11              | 14.69              | 3        | 4.37            | 1.46             | 0.99            |
| 1        | 2        | 2        | 1      | 1         | 11.20             | 1.97              | 12.59              | 5        | 5.09            | 1.02             | 0.39            |
| 1        | 2        | 2        | 1      | 2         | 16.50             | 1.94              | 24.23              | 9        | 8.82            | 0.98             | 2.58            |
| 1        | 2        | 2        | 1      | 3         | 13.70             | 2.01              | 18.90              | 8        | 9.15            | 1.14             | 1.59            |
| 1        | 2        | 2        | 1      | 4         | 9.90              | 1.86              | 12.73              | 2        | 2.30            | 1.15             | 2.60            |
| 1        | 2        | 2        | 1      | 5         | 8.00              | 1.85              | 8.02               | 3        | 1.98            | 0.66             | 3.09            |
| 1        | 2        | 2        | 1      | 6         | 14.80             | 2.16              | 23.63              | 6        | 7.10            | 1.18             | 5.96            |

|   |   |   |   |   |       |      |       |    |       |      |       |
|---|---|---|---|---|-------|------|-------|----|-------|------|-------|
| 1 | 2 | 2 | 1 | 7 | 12.30 | 2.04 | 12.67 | 10 | 10.20 | 1.02 | 1.40  |
| 1 | 2 | 2 | 1 | 8 | 8.40  | 1.83 | 12.61 | 3  | 4.10  | 1.37 | 3.09  |
| 1 | 2 | 2 | 2 | 1 | 11.70 | 2.00 | 17.60 | 8  | 10.62 | 1.33 | 8.31  |
| 1 | 2 | 2 | 2 | 2 | 9.20  | 2.08 | 11.07 | 4  | 5.17  | 1.29 | 3.91  |
| 1 | 2 | 2 | 2 | 3 | 8.80  | 1.95 | 9.50  | 6  | 5.84  | 0.97 | 4.82  |
| 1 | 2 | 2 | 2 | 4 | 14.20 | 1.94 | 23.11 | 10 | 12.45 | 1.25 | 10.16 |
| 1 | 2 | 2 | 2 | 5 | 14.00 | 1.84 | 17.19 | 9  | 7.82  | 0.87 | 3.53  |
| 1 | 2 | 2 | 2 | 6 | 12.10 | 2.01 | 16.48 | 9  | 7.86  | 0.87 | 2.36  |
| 1 | 2 | 2 | 2 | 7 | 12.80 | 2.17 | 15.35 | 7  | 8.79  | 1.26 | 6.03  |
| 1 | 2 | 2 | 2 | 8 | 9.00  | 1.84 | 10.35 | 6  | 5.26  | 0.88 | 1.86  |
| 1 | 2 | 2 | 3 | 1 | 15.70 | 2.11 | 24.56 | 10 | 9.46  | 0.95 | 4.11  |
| 1 | 2 | 2 | 3 | 2 | 14.20 | 1.90 | 21.33 | 11 | 9.10  | 0.83 | 4.36  |
| 1 | 2 | 2 | 3 | 3 | 9.90  | 2.12 | 12.77 | 7  | 6.17  | 0.88 | 2.70  |
| 1 | 2 | 2 | 3 | 4 | 13.70 | 2.01 | 19.04 | 9  | 8.54  | 0.95 | 4.23  |
| 1 | 2 | 2 | 3 | 5 | 11.90 | 2.06 | 18.38 | 8  | 7.30  | 0.91 | 3.02  |
| 1 | 2 | 2 | 3 | 6 | 13.60 | 1.94 | 21.90 | 13 | 9.77  | 0.75 | 3.78  |
| 1 | 2 | 2 | 3 | 7 | 13.10 | 1.99 | 16.66 | 9  | 7.38  | 0.82 | 3.18  |
| 1 | 2 | 2 | 3 | 8 | 11.20 | 1.81 | 16.37 | 8  | 7.43  | 0.93 | 2.60  |
| 1 | 2 | 3 | 1 | 1 | 12.80 | 2.20 | 12.36 | 3  | 1.00  | 0.33 | 2.54  |
| 1 | 2 | 3 | 1 | 2 | 15.50 | 2.14 | 20.73 | 9  | 8.05  | 0.89 | 4.50  |
| 1 | 2 | 3 | 1 | 3 | 10.30 | 2.11 | 28.55 | 10 | 10.28 | 1.03 | 5.75  |
| 1 | 2 | 3 | 1 | 4 | 17.70 | 2.14 | 22.84 | 9  | 8.29  | 0.92 | 4.43  |
| 1 | 2 | 3 | 1 | 5 | 16.20 | 1.65 | 18.87 | 4  | 3.76  | 0.94 | 5.03  |
| 1 | 2 | 3 | 1 | 6 | 14.40 | 1.79 | 13.86 | 4  | 2.47  | 0.62 | 2.32  |
| 1 | 2 | 3 | 1 | 7 | 10.50 | 2.21 | 17.47 | 6  | 4.04  | 0.67 | 4.47  |
| 1 | 2 | 3 | 1 | 8 | 13.20 | 2.01 | 18.86 | 8  | 7.55  | 0.94 | 4.44  |
| 1 | 2 | 3 | 2 | 1 | 10.60 | 1.85 | 9.74  | 4  | 4.14  | 1.04 | 4.12  |
| 1 | 2 | 3 | 2 | 2 | 14.60 | 2.03 | 18.72 | 9  | 6.89  | 0.77 | 8.16  |
| 1 | 2 | 3 | 2 | 3 | 13.40 | 2.11 | 15.66 | 8  | 6.02  | 0.75 | 2.50  |
| 1 | 2 | 3 | 2 | 4 | 12.60 | 1.70 | 17.26 | 6  | 6.09  | 1.02 | 3.05  |
| 1 | 2 | 3 | 2 | 5 | 13.00 | 2.01 | 15.30 | 6  | 6.45  | 1.08 | 2.71  |
| 1 | 2 | 3 | 2 | 6 | 13.40 | 2.06 | 35.50 | 8  | 6.92  | 0.87 | 2.75  |
| 1 | 2 | 3 | 2 | 7 | 15.50 | 2.24 | 22.82 | 7  | 7.62  | 1.09 | 5.22  |
| 1 | 2 | 3 | 2 | 8 | 14.80 | 2.11 | 20.76 | 2  | 2.49  | 1.25 | 7.25  |
| 1 | 2 | 3 | 3 | 1 | 15.10 | 2.31 | 19.20 | 8  | 7.11  | 0.89 | 5.56  |
| 1 | 2 | 3 | 3 | 2 | 16.20 | 2.05 | 16.53 | 9  | 6.48  | 0.72 | 3.80  |

|   |   |    |   |   |       |      |       |   |      |      |      |
|---|---|----|---|---|-------|------|-------|---|------|------|------|
| 1 | 2 | 3  | 3 | 3 | 14.40 | 2.14 | 17.70 | 8 | 6.48 | 0.81 | 4.32 |
| 1 | 2 | 3  | 3 | 4 | 12.40 | 1.95 | 20.32 | 7 | 7.36 | 1.05 | 5.39 |
| 1 | 2 | 3  | 3 | 5 | 11.20 | 1.97 | 10.09 | 5 | 4.03 | 0.81 | 2.79 |
| 1 | 2 | 3  | 3 | 6 | 16.00 | 2.16 | 24.47 | 3 | 3.17 | 1.06 | 1.98 |
| 1 | 2 | 3  | 3 | 7 | 13.20 | 2.16 | 15.48 | 6 | 4.77 | 0.80 | 4.27 |
| 1 | 2 | 3  | 3 | 8 | 13.20 | 1.85 | 21.35 | 8 | 7.92 | 0.99 | 6.84 |
| 1 | 2 | 16 | 1 | 1 | 11.90 | 2.29 | 18.21 | 8 | 5.85 | 0.73 | 6.21 |
| 1 | 2 | 16 | 1 | 2 | 11.80 | 2.14 | 18.79 | 8 | 5.50 | 0.69 | 6.06 |
| 1 | 2 | 16 | 1 | 3 | 10.10 | 1.96 | 13.82 | 4 | 3.07 | 0.77 | 5.01 |
| 1 | 2 | 16 | 1 | 4 | 11.60 | 2.10 | 11.91 | 3 | 2.07 | 0.69 | 4.96 |
| 1 | 2 | 16 | 1 | 5 | 10.50 | 2.19 | 13.21 | 4 | 3.22 | 0.81 | 5.34 |
| 1 | 2 | 16 | 1 | 6 | 10.00 | 2.06 | 12.05 | 4 | 2.77 | 0.69 | 5.11 |
| 1 | 2 | 16 | 1 | 7 | 8.60  | 2.26 | 11.96 | 4 | 2.33 | 0.58 | 5.28 |
| 1 | 2 | 16 | 1 | 8 | 8.20  | 2.26 | 8.93  | 3 | 2.27 | 0.76 | 4.26 |
| 1 | 2 | 16 | 2 | 1 | 8.80  | 2.21 | 8.11  | 3 | 1.85 | 0.62 | 3.48 |
| 1 | 2 | 16 | 2 | 2 | 9.80  | 2.36 | 14.20 | 5 | 3.99 | 0.80 | 5.35 |
| 1 | 2 | 16 | 2 | 3 | 10.50 | 2.00 | 15.55 | 6 | 4.54 | 0.76 | 5.11 |
| 1 | 2 | 16 | 2 | 4 | 8.20  | 1.85 | 7.88  | 3 | 1.85 | 0.62 | 3.34 |
| 1 | 2 | 16 | 2 | 5 | 8.30  | 1.96 | 9.25  | 5 | 2.61 | 0.52 | 3.71 |
| 1 | 2 | 16 | 2 | 6 | 8.00  | 1.56 | 5.89  | 2 | 0.89 | 0.45 | 2.74 |
| 1 | 2 | 16 | 2 | 7 | 11.60 | 1.91 | 14.78 | 7 | 4.06 | 0.58 | 5.33 |
| 1 | 2 | 16 | 2 | 8 | 7.70  | 1.91 | 8.66  | 3 | 2.03 | 0.68 | 3.74 |
| 1 | 2 | 16 | 3 | 1 | 12.90 | 1.94 | 16.78 | 9 | 4.46 | 0.50 | 5.09 |
| 1 | 2 | 16 | 3 | 2 | 12.80 | 2.16 | 21.21 | 7 | 5.39 | 0.77 | 7.64 |
| 1 | 2 | 16 | 3 | 3 | 8.20  | 2.14 | 10.20 | 3 | 2.31 | 0.77 | 4.86 |
| 1 | 2 | 16 | 3 | 4 | 12.40 | 2.04 | 21.60 | 5 | 2.97 | 0.59 | 3.96 |
| 1 | 2 | 16 | 3 | 5 | 7.40  | 2.06 | 6.96  | 5 | 3.66 | 0.73 | 3.90 |
| 1 | 2 | 16 | 3 | 6 | 8.10  | 2.11 | 7.66  | 5 | 3.37 | 0.67 | 4.90 |
| 1 | 2 | 16 | 3 | 7 | 7.80  | 2.26 | 7.99  | 3 | 1.81 | 0.60 | 3.06 |
| 1 | 2 | 16 | 3 | 8 | 6.90  | 1.76 | 7.28  | 3 | 1.69 | 0.56 | 3.06 |
| 1 | 2 | 17 | 1 | 1 | 8.20  | 1.99 | 11.47 | 4 | 3.79 | 0.95 | 3.13 |
| 1 | 2 | 17 | 1 | 2 | 10.30 | 2.04 | 14.32 | 5 | 4.78 | 0.96 | 4.07 |
| 1 | 2 | 17 | 1 | 3 | 18.60 | 1.95 | 27.41 | 8 | 7.23 | 0.90 | 3.90 |
| 1 | 2 | 17 | 1 | 4 | 8.90  | 1.76 | 8.18  | 3 | 2.41 | 0.80 | 2.46 |
| 1 | 2 | 17 | 1 | 5 | 6.70  | 1.74 | 5.73  | 3 | 1.88 | 0.63 | 1.98 |
| 1 | 2 | 17 | 1 | 6 | 9.60  | 1.89 | 11.60 | 2 | 1.37 | 0.69 | 2.19 |

|   |   |    |   |   |       |      |       |    |      |      |      |
|---|---|----|---|---|-------|------|-------|----|------|------|------|
| 1 | 2 | 17 | 1 | 7 | 8.90  | 1.79 | 7.53  | 3  | 2.50 | 0.83 | 2.00 |
| 1 | 2 | 17 | 1 | 8 | 8.50  | 2.11 | 10.15 | 3  | 2.87 | 0.96 | 1.17 |
| 1 | 2 | 17 | 2 | 1 | 9.60  | 1.89 | 10.38 | 3  | 2.54 | 0.85 | 4.49 |
| 1 | 2 | 17 | 2 | 2 | 10.50 | 2.09 | 11.87 | 4  | 3.68 | 0.92 | 3.60 |
| 1 | 2 | 17 | 2 | 3 | 8.40  | 2.05 | 8.19  | 3  | 2.25 | 0.75 | 3.03 |
| 1 | 2 | 17 | 2 | 4 | 14.00 | 1.96 | 12.79 | 4  | 3.38 | 0.85 | 4.71 |
| 1 | 2 | 17 | 2 | 5 | 10.60 | 2.09 | 14.30 | 4  | 2.97 | 0.74 | 5.75 |
| 1 | 2 | 17 | 2 | 6 | 9.60  | 1.96 | 11.28 | 3  | 2.91 | 0.97 | 4.60 |
| 1 | 2 | 17 | 2 | 7 | 8.90  | 1.76 | 10.57 | 4  | 3.12 | 0.78 | 2.93 |
| 1 | 2 | 17 | 2 | 8 | 7.40  | 2.05 | 8.56  | 3  | 2.55 | 0.85 | 3.40 |
| 1 | 2 | 17 | 3 | 1 | 12.00 | 1.66 | 11.66 | 4  | 2.66 | 0.67 | 1.56 |
| 1 | 2 | 17 | 3 | 2 | 9.20  | 1.89 | 8.14  | 2  | 1.60 | 0.80 | 1.75 |
| 1 | 2 | 17 | 3 | 3 | 13.10 | 1.84 | 17.19 | 6  | 4.90 | 0.82 | 4.03 |
| 1 | 2 | 17 | 3 | 4 | 12.90 | 1.84 | 17.79 | 5  | 5.60 | 1.12 | 3.95 |
| 1 | 2 | 17 | 3 | 5 | 8.20  | 1.41 | 6.79  | 1  | 0.80 | 0.80 | 2.68 |
| 1 | 2 | 17 | 3 | 6 | 8.10  | 2.01 | 8.78  | 2  | 1.54 | 0.77 | 3.05 |
| 1 | 2 | 17 | 3 | 7 | 9.10  | 1.76 | 7.26  | 2  | 1.67 | 0.84 | 3.19 |
| 1 | 2 | 17 | 3 | 8 | 11.10 | 1.96 | 13.61 | 4  | 3.29 | 0.82 | 4.91 |
| 1 | 2 | 18 | 1 | 1 | 10.70 | 1.89 | 10.52 | 7  | 3.93 | 0.56 | 2.46 |
| 1 | 2 | 18 | 1 | 2 | 11.10 | 1.84 | 12.31 | 8  | 4.53 | 0.57 | 3.74 |
| 1 | 2 | 18 | 1 | 3 | 11.30 | 1.64 | 11.21 | 8  | 4.21 | 0.53 | 3.30 |
| 1 | 2 | 18 | 1 | 4 | 11.60 | 1.84 | 9.58  | 6  | 3.16 | 0.53 | 3.75 |
| 1 | 2 | 18 | 1 | 5 | 9.90  | 1.56 | 7.78  | 4  | 2.30 | 0.58 | 1.41 |
| 1 | 2 | 18 | 1 | 6 | 10.60 | 1.51 | 8.49  | 6  | 2.92 | 0.49 | 2.21 |
| 1 | 2 | 18 | 1 | 7 | 10.90 | 1.66 | 7.76  | 5  | 2.69 | 0.54 | 1.58 |
| 1 | 2 | 18 | 1 | 8 | 8.60  | 1.61 | 7.98  | 7  | 3.90 | 0.56 | 2.13 |
| 1 | 2 | 18 | 2 | 1 | 11.30 | 1.76 | 13.06 | 8  | 4.48 | 0.56 | 3.90 |
| 1 | 2 | 18 | 2 | 2 | 11.90 | 1.78 | 12.91 | 8  | 4.54 | 0.57 | 3.80 |
| 1 | 2 | 18 | 2 | 3 | 7.90  | 1.64 | 6.77  | 3  | 1.45 | 0.48 | 2.00 |
| 1 | 2 | 18 | 2 | 4 | 11.80 | 1.76 | 11.05 | 7  | 4.06 | 0.58 | 2.95 |
| 1 | 2 | 18 | 2 | 5 | 7.30  | 1.69 | 6.57  | 4  | 2.27 | 0.57 | 2.12 |
| 1 | 2 | 18 | 2 | 6 | 8.90  | 1.76 | 6.91  | 4  | 2.47 | 0.62 | 2.01 |
| 1 | 2 | 18 | 2 | 7 | 10.50 | 1.61 | 9.97  | 7  | 3.47 | 0.50 | 2.65 |
| 1 | 2 | 18 | 2 | 8 | 11.20 | 1.69 | 7.80  | 5  | 2.20 | 0.44 | 2.09 |
| 1 | 2 | 18 | 3 | 1 | 15.60 | 2.03 | 20.56 | 10 | 5.75 | 0.58 | 6.12 |
| 1 | 2 | 18 | 3 | 2 | 15.60 | 1.76 | 17.16 | 12 | 6.17 | 0.51 | 4.96 |

|   |   |    |   |   |       |      |       |    |       |      |      |
|---|---|----|---|---|-------|------|-------|----|-------|------|------|
| 1 | 2 | 18 | 3 | 3 | 11.30 | 1.76 | 12.32 | 7  | 4.06  | 0.58 | 4.10 |
| 1 | 2 | 18 | 3 | 4 | 12.80 | 1.26 | 12.83 | 8  | 3.95  | 0.49 | 4.39 |
| 1 | 2 | 18 | 3 | 5 | 9.70  | 1.67 | 9.87  | 5  | 3.03  | 0.61 | 3.26 |
| 1 | 2 | 18 | 3 | 6 | 14.70 | 1.74 | 17.67 | 13 | 7.11  | 0.55 | 4.34 |
| 1 | 2 | 18 | 3 | 7 | 8.30  | 1.76 | 7.72  | 4  | 2.33  | 0.58 | 2.54 |
| 1 | 2 | 18 | 3 | 8 | 8.20  | 1.73 | 5.54  | 4  | 1.47  | 0.37 | 1.70 |
| 1 | 2 | 19 | 1 | 1 | 15.50 | 1.79 | 20.18 | 12 | 8.46  | 0.71 | 5.58 |
| 1 | 2 | 19 | 1 | 2 | 14.30 | 1.69 | 11.61 | 10 | 5.27  | 0.53 | 2.71 |
| 1 | 2 | 19 | 1 | 3 | 14.90 | 1.78 | 13.75 | 9  | 5.48  | 0.61 | 3.81 |
| 1 | 2 | 19 | 1 | 4 | 10.70 | 1.76 | 9.52  | 7  | 3.80  | 0.54 | 2.82 |
| 1 | 2 | 19 | 1 | 5 | 12.30 | 1.76 | 9.86  | 8  | 4.70  | 0.59 | 4.31 |
| 1 | 2 | 19 | 1 | 6 | 13.80 | 1.74 | 12.79 | 7  | 3.42  | 0.49 | 3.24 |
| 1 | 2 | 19 | 1 | 7 | 12.60 | 1.79 | 10.54 | 8  | 3.85  | 0.48 | 3.14 |
| 1 | 2 | 19 | 1 | 8 | 15.20 | 1.84 | 14.64 | 9  | 5.59  | 0.62 | 4.29 |
| 1 | 2 | 19 | 2 | 1 | 10.50 | 1.56 | 9.66  | 6  | 4.32  | 0.72 | 3.89 |
| 1 | 2 | 19 | 2 | 2 | 13.40 | 1.78 | 13.51 | 10 | 6.58  | 0.66 | 3.81 |
| 1 | 2 | 19 | 2 | 3 | 12.80 | 2.00 | 14.13 | 11 | 7.62  | 0.69 | 4.09 |
| 1 | 2 | 19 | 2 | 4 | 12.50 | 1.82 | 13.00 | 8  | 5.22  | 0.65 | 2.75 |
| 1 | 2 | 19 | 2 | 5 | 12.50 | 1.77 | 11.53 | 9  | 6.18  | 0.69 | 3.43 |
| 1 | 2 | 19 | 2 | 6 | 15.10 | 1.69 | 16.45 | 8  | 6.23  | 0.78 | 4.29 |
| 1 | 2 | 19 | 2 | 7 | 14.60 | 1.79 | 15.32 | 8  | 5.83  | 0.73 | 3.30 |
| 1 | 2 | 19 | 2 | 8 | 13.10 | 1.89 | 12.34 | 8  | 3.91  | 0.49 | 2.51 |
| 1 | 2 | 19 | 3 | 1 | 17.60 | 1.90 | 23.70 | 15 | 10.20 | 0.68 | 6.32 |
| 1 | 2 | 19 | 3 | 2 | 15.20 | 1.88 | 14.66 | 9  | 6.46  | 0.72 | 4.45 |
| 1 | 2 | 19 | 3 | 3 | 11.80 | 1.95 | 12.81 | 8  | 5.68  | 0.71 | 3.66 |
| 1 | 2 | 19 | 3 | 4 | 9.50  | 1.76 | 8.18  | 5  | 3.52  | 0.70 | 2.00 |
| 1 | 2 | 19 | 3 | 5 | 13.90 | 1.84 | 13.60 | 9  | 5.90  | 0.66 | 3.80 |
| 1 | 2 | 19 | 3 | 6 | 14.50 | 1.83 | 15.10 | 10 | 6.66  | 0.67 | 4.77 |
| 1 | 2 | 19 | 3 | 7 | 10.50 | 1.89 | 11.22 | 7  | 4.56  | 0.65 | 3.74 |
| 1 | 2 | 19 | 3 | 8 | 11.50 | 1.66 | 11.01 | 9  | 5.04  | 0.56 | 3.25 |
| 1 | 2 | 20 | 1 | 1 | 12.20 | 1.91 | 13.97 | 6  | 4.87  | 0.81 | 4.96 |
| 1 | 2 | 20 | 1 | 2 | 10.30 | 2.07 | 12.46 | 7  | 4.91  | 0.70 | 4.36 |
| 1 | 2 | 20 | 1 | 3 | 14.60 | 2.08 | 14.44 | 9  | 6.06  | 0.67 | 6.64 |
| 1 | 2 | 20 | 1 | 4 | 12.60 | 2.11 | 17.85 | 6  | 4.41  | 0.74 | 3.64 |
| 1 | 2 | 20 | 1 | 5 | 10.10 | 1.99 | 10.69 | 10 | 8.29  | 0.83 | 6.49 |
| 1 | 2 | 20 | 1 | 6 | 11.40 | 2.01 | 13.71 | 7  | 6.72  | 0.96 | 6.10 |

|   |   |    |   |   |       |      |       |   |      |      |      |
|---|---|----|---|---|-------|------|-------|---|------|------|------|
| 1 | 2 | 20 | 1 | 7 | 12.70 | 2.14 | 17.88 | 5 | 3.75 | 0.75 | 3.35 |
| 1 | 2 | 20 | 1 | 8 | 9.20  | 1.99 | 9.15  | 7 | 5.02 | 0.72 | 4.46 |
| 1 | 2 | 20 | 2 | 1 | 12.70 | 2.01 | 15.13 | 6 | 4.92 | 0.82 | 3.95 |
| 1 | 2 | 20 | 2 | 2 | 13.10 | 1.94 | 15.07 | 6 | 4.39 | 0.73 | 3.18 |
| 1 | 2 | 20 | 2 | 3 | 15.70 | 2.06 | 21.94 | 7 | 4.90 | 0.70 | 4.51 |
| 1 | 2 | 20 | 2 | 4 | 11.20 | 1.99 | 12.78 | 7 | 6.16 | 0.88 | 5.40 |
| 1 | 2 | 20 | 2 | 5 | 15.40 | 2.06 | 22.91 | 4 | 3.26 | 0.82 | 3.26 |
| 1 | 2 | 20 | 2 | 6 | 13.00 | 2.16 | 19.39 | 8 | 3.50 | 0.44 | 4.23 |
| 1 | 2 | 20 | 2 | 7 | 8.80  | 1.91 | 11.15 | 8 | 5.69 | 0.71 | 4.62 |
| 1 | 2 | 20 | 2 | 8 | 11.30 | 1.96 | 13.84 | 4 | 3.19 | 0.80 | 2.66 |
| 1 | 2 | 20 | 3 | 1 | 11.20 | 2.39 | 9.37  | 5 | 3.71 | 0.74 | 2.80 |
| 1 | 2 | 20 | 3 | 2 | 14.00 | 1.93 | 16.04 | 6 | 5.00 | 0.83 | 4.75 |
| 1 | 2 | 20 | 3 | 3 | 11.10 | 1.94 | 12.67 | 4 | 2.93 | 0.73 | 3.27 |
| 1 | 2 | 20 | 3 | 4 | 8.00  | 1.99 | 9.75  | 6 | 5.02 | 0.84 | 5.65 |
| 1 | 2 | 20 | 3 | 5 | 13.30 | 2.11 | 16.65 | 5 | 3.96 | 0.79 | 2.38 |
| 1 | 2 | 20 | 3 | 6 | 9.10  | 1.96 | 9.26  | 6 | 4.70 | 0.78 | 3.13 |
| 1 | 2 | 20 | 3 | 7 | 9.10  | 2.05 | 10.68 | 7 | 5.32 | 0.76 | 5.02 |
| 1 | 2 | 20 | 3 | 8 | 11.00 | 1.91 | 14.08 | 3 | 1.97 | 0.66 | 3.25 |
| 1 | 2 | 15 | 1 | 1 | 11.30 | 1.86 | 9.81  | 4 | 3.07 | 0.77 | 3.55 |
| 1 | 2 | 15 | 1 | 2 | 9.20  | 2.05 | 6.92  | 2 | 1.62 | 0.81 | 2.92 |
| 1 | 2 | 15 | 1 | 3 | 8.90  | 2.15 | 8.58  | 4 | 2.73 | 0.68 | 3.19 |
| 1 | 2 | 15 | 1 | 4 | 8.50  | 1.98 | 8.43  | 4 | 2.74 | 0.69 | 3.52 |
| 1 | 2 | 15 | 1 | 5 | 10.40 | 2.04 | 8.52  | 3 | 2.39 | 0.80 | 3.04 |
| 1 | 2 | 15 | 1 | 6 | 7.10  | 2.40 | 8.56  | 3 | 2.75 | 0.92 | 3.05 |
| 1 | 2 | 15 | 1 | 7 | 9.30  | 1.99 | 7.95  | 3 | 2.01 | 0.67 | 3.27 |
| 1 | 2 | 15 | 1 | 8 | 6.90  | 2.06 | 9.34  | 5 | 3.68 | 0.74 | 3.30 |
| 1 | 2 | 15 | 2 | 1 | 8.90  | 2.08 | 7.21  | 3 | 1.82 | 0.61 | 3.00 |
| 1 | 2 | 15 | 2 | 2 | 11.40 | 1.94 | 13.43 | 7 | 3.74 | 0.53 | 4.60 |
| 1 | 2 | 15 | 2 | 3 | 11.00 | 2.28 | 12.24 | 5 | 3.70 | 0.74 | 4.62 |
| 1 | 2 | 15 | 2 | 4 | 13.80 | 2.25 | 10.71 | 2 | 1.48 | 0.74 | 5.26 |
| 1 | 2 | 15 | 2 | 5 | 9.60  | 2.19 | 10.60 | 3 | 2.33 | 0.78 | 4.52 |
| 1 | 2 | 15 | 2 | 6 | 7.30  | 2.30 | 9.95  | 5 | 3.47 | 0.69 | 3.48 |
| 1 | 2 | 15 | 2 | 7 | 5.70  | 2.15 | 6.33  | 3 | 2.29 | 0.76 | 2.34 |
| 1 | 2 | 15 | 2 | 8 | 7.10  | 2.15 | 6.52  | 3 | 2.02 | 0.67 | 2.24 |
| 1 | 2 | 15 | 3 | 1 | 7.50  | 2.10 | 7.88  | 2 | 1.70 | 0.85 | 3.25 |
| 1 | 2 | 15 | 3 | 2 | 8.10  | 2.09 | 7.29  | 3 | 1.78 | 0.59 | 2.27 |

|   |   |    |   |   |       |      |       |    |      |      |      |
|---|---|----|---|---|-------|------|-------|----|------|------|------|
| 1 | 2 | 15 | 3 | 3 | 9.20  | 2.21 | 8.34  | 2  | 1.52 | 0.76 | 1.91 |
| 1 | 2 | 15 | 3 | 4 | 9.80  | 2.16 | 9.95  | 4  | 3.62 | 0.91 | 4.35 |
| 1 | 2 | 15 | 3 | 5 | 8.00  | 2.16 | 10.45 | 5  | 3.19 | 0.64 | 3.34 |
| 1 | 2 | 15 | 3 | 6 | 7.00  | 1.66 | 6.19  | 3  | 2.40 | 0.80 | 3.61 |
| 1 | 2 | 15 | 3 | 7 | 8.70  | 1.46 | 6.40  | 3  | 2.01 | 0.67 | 2.30 |
| 1 | 2 | 15 | 3 | 8 | 6.90  | 2.14 | 6.97  | 4  | 2.79 | 0.70 | 3.59 |
| 1 | 2 | 26 | 1 | 1 | 14.70 | 2.28 | 27.37 | 11 | 6.42 | 0.58 | 8.10 |
| 1 | 2 | 26 | 1 | 2 | 7.40  | 2.13 | 8.94  | 3  | 1.70 | 0.57 | 2.80 |
| 1 | 2 | 26 | 1 | 3 | 7.90  | 2.20 | 9.10  | 3  | 2.00 | 0.67 | 3.03 |
| 1 | 2 | 26 | 1 | 4 | 7.60  | 1.90 | 7.06  | 3  | 1.00 | 0.33 | 2.37 |
| 1 | 2 | 26 | 1 | 5 | 6.90  | 1.80 | 5.96  | 2  | 0.97 | 0.49 | 1.93 |
| 1 | 2 | 26 | 1 | 6 | 4.50  | 2.00 | 5.02  | 2  | 0.87 | 0.44 | 1.86 |
| 1 | 2 | 26 | 1 | 7 | 8.40  | 1.73 | 7.26  | 2  | 0.94 | 0.47 | 3.09 |
| 1 | 2 | 26 | 1 | 8 | 7.60  | 1.91 | 6.09  | 2  | 0.86 | 0.43 | 1.87 |
| 1 | 2 | 26 | 2 | 1 | 13.90 | 2.15 | 26.62 | 7  | 5.08 | 0.73 | 9.82 |
| 1 | 2 | 26 | 2 | 2 | 9.70  | 2.24 | 12.45 | 5  | 2.59 | 0.52 | 4.56 |
| 1 | 2 | 26 | 2 | 3 | 8.90  | 2.05 | 9.12  | 4  | 2.58 | 0.65 | 3.63 |
| 1 | 2 | 26 | 2 | 4 | 7.90  | 2.06 | 5.36  | 4  | 2.32 | 0.58 | 2.26 |
| 1 | 2 | 26 | 2 | 5 | 7.80  | 1.95 | 9.91  | 3  | 1.73 | 0.58 | 3.88 |
| 1 | 2 | 26 | 2 | 6 | 9.20  | 1.94 | 9.26  | 2  | 1.40 | 0.70 | 3.49 |
| 1 | 2 | 26 | 2 | 7 | 8.10  | 1.91 | 10.18 | 3  | 2.15 | 0.72 | 2.70 |
| 1 | 2 | 26 | 2 | 8 | 8.60  | 2.00 | 11.58 | 6  | 3.75 | 0.63 | 4.45 |
| 1 | 2 | 26 | 3 | 1 | 9.70  | 2.05 | 11.32 | 2  | 1.08 | 0.54 | 2.37 |
| 1 | 2 | 26 | 3 | 2 | 8.20  | 1.89 | 7.26  | 6  | 4.51 | 0.75 | 5.20 |
| 1 | 2 | 26 | 3 | 3 | 7.40  | 1.86 | 7.64  | 6  | 4.92 | 0.82 | 8.04 |
| 1 | 2 | 26 | 3 | 4 | 7.40  | 2.03 | 7.41  | 3  | 1.88 | 0.63 | 3.98 |
| 1 | 2 | 26 | 3 | 5 | 8.60  | 2.00 | 9.53  | 2  | 1.49 | 0.75 | 2.64 |
| 1 | 2 | 26 | 3 | 6 | 13.10 | 2.39 | 22.61 | 2  | 0.98 | 0.49 | 3.38 |
| 1 | 2 | 26 | 3 | 7 | 11.70 | 2.20 | 18.03 | 2  | 0.90 | 0.45 | 3.18 |
| 1 | 2 | 26 | 3 | 8 | 7.30  | 2.00 | 6.67  | 4  | 2.15 | 0.54 | 4.59 |
| 1 | 2 | 14 | 1 | 1 | 11.00 | 1.79 | 10.94 | 5  | 2.68 | 0.54 | 1.35 |
| 1 | 2 | 14 | 1 | 2 | 11.70 | 2.08 | 18.20 | 7  | 5.04 | 0.72 | 5.48 |
| 1 | 2 | 14 | 1 | 3 | 10.30 | 1.80 | 8.20  | 4  | 1.81 | 0.45 | 1.98 |
| 1 | 2 | 14 | 1 | 4 | 10.40 | 2.00 | 10.12 | 6  | 2.96 | 0.49 | 2.27 |
| 1 | 2 | 14 | 1 | 5 | 15.20 | 2.06 | 15.67 | 6  | 3.76 | 0.63 | 6.24 |
| 1 | 2 | 14 | 1 | 6 | 8.60  | 1.86 | 7.23  | 2  | 1.34 | 0.67 | 3.12 |

|   |   |    |   |   |       |      |       |    |       |      |       |
|---|---|----|---|---|-------|------|-------|----|-------|------|-------|
| 1 | 2 | 14 | 1 | 7 | 11.20 | 2.00 | 15.10 | 9  | 5.02  | 0.56 | 2.94  |
| 1 | 2 | 14 | 1 | 8 | 8.50  | 2.14 | 9.16  | 4  | 2.67  | 0.67 | 1.22  |
| 1 | 2 | 14 | 2 | 1 | 13.00 | 2.24 | 21.88 | 10 | 7.21  | 0.72 | 7.18  |
| 1 | 2 | 14 | 2 | 2 | 10.10 | 2.10 | 12.27 | 4  | 3.07  | 0.77 | 4.16  |
| 1 | 2 | 14 | 2 | 3 | 11.20 | 1.94 | 13.81 | 6  | 4.12  | 0.69 | 3.95  |
| 1 | 2 | 14 | 2 | 4 | 10.90 | 2.15 | 13.80 | 5  | 3.77  | 0.75 | 4.65  |
| 1 | 2 | 14 | 2 | 5 | 10.80 | 1.85 | 12.04 | 5  | 2.48  | 0.50 | 4.36  |
| 1 | 2 | 14 | 2 | 6 | 12.80 | 1.74 | 11.41 | 4  | 1.91  | 0.48 | 5.64  |
| 1 | 2 | 14 | 2 | 7 | 12.50 | 2.14 | 15.80 | 9  | 5.15  | 0.57 | 5.17  |
| 1 | 2 | 14 | 2 | 8 | 11.20 | 1.96 | 12.67 | 6  | 3.92  | 0.65 | 4.51  |
| 1 | 2 | 14 | 3 | 1 | 14.80 | 2.25 | 20.00 | 3  | 2.17  | 0.72 | 5.12  |
| 1 | 2 | 14 | 3 | 2 | 13.70 | 1.99 | 15.06 | 5  | 3.52  | 0.70 | 4.64  |
| 1 | 2 | 14 | 3 | 3 | 17.00 | 2.25 | 23.75 | 6  | 3.81  | 0.64 | 7.55  |
| 1 | 2 | 14 | 3 | 4 | 11.30 | 1.86 | 12.50 | 5  | 3.41  | 0.68 | 4.68  |
| 1 | 2 | 14 | 3 | 5 | 7.90  | 1.95 | 10.22 | 6  | 3.74  | 0.62 | 4.86  |
| 1 | 2 | 14 | 3 | 6 | 15.90 | 2.25 | 18.00 | 9  | 6.45  | 0.72 | 10.80 |
| 1 | 2 | 14 | 3 | 7 | 10.50 | 2.01 | 11.39 | 9  | 4.12  | 0.46 | 6.26  |
| 1 | 2 | 14 | 3 | 8 | 10.80 | 1.75 | 9.57  | 10 | 6.45  | 0.65 | 5.68  |
| 1 | 2 | 13 | 1 | 1 | 9.80  | 2.20 | 12.91 | 3  | 3.38  | 1.13 | 1.64  |
| 1 | 2 | 13 | 1 | 2 | 16.70 | 2.05 | 25.72 | 7  | 6.71  | 0.96 | 7.20  |
| 1 | 2 | 13 | 1 | 3 | 18.70 | 1.91 | 25.59 | 5  | 3.17  | 0.63 | 5.32  |
| 1 | 2 | 13 | 1 | 4 | 13.30 | 2.26 | 23.68 | 5  | 5.49  | 1.10 | 9.70  |
| 1 | 2 | 13 | 1 | 5 | 11.20 | 2.15 | 15.78 | 3  | 3.96  | 1.32 | 7.47  |
| 1 | 2 | 13 | 1 | 6 | 9.70  | 2.40 | 14.97 | 4  | 4.42  | 1.11 | 5.86  |
| 1 | 2 | 13 | 1 | 7 | 18.90 | 2.59 | 37.48 | 11 | 11.80 | 1.07 | 14.17 |
| 1 | 2 | 13 | 1 | 8 | 9.20  | 2.15 | 12.98 | 3  | 1.78  | 0.59 | 3.84  |
| 1 | 2 | 13 | 2 | 1 | 15.00 | 2.09 | 21.25 | 5  | 5.52  | 1.10 | 10.07 |
| 1 | 2 | 13 | 2 | 2 | 12.30 | 2.12 | 14.21 | 3  | 3.65  | 1.22 | 9.80  |
| 1 | 2 | 13 | 2 | 3 | 13.80 | 2.19 | 19.04 | 4  | 3.43  | 0.86 | 7.85  |
| 1 | 2 | 13 | 2 | 4 | 13.80 | 2.10 | 17.43 | 6  | 4.14  | 0.69 | 8.13  |
| 1 | 2 | 13 | 2 | 5 | 17.60 | 2.33 | 27.61 | 7  | 7.35  | 1.05 | 12.35 |
| 1 | 2 | 13 | 2 | 6 | 15.50 | 2.00 | 24.24 | 6  | 6.42  | 1.07 | 11.92 |
| 1 | 2 | 13 | 2 | 7 | 9.30  | 2.01 | 12.21 | 3  | 3.23  | 1.08 | 6.28  |
| 1 | 2 | 13 | 2 | 8 | 12.30 | 2.09 | 15.58 | 4  | 3.70  | 0.93 | 7.17  |
| 1 | 2 | 13 | 3 | 1 | 15.80 | 2.39 | 24.40 | 3  | 2.98  | 0.99 | 6.11  |
| 1 | 2 | 13 | 3 | 2 | 10.50 | 2.15 | 13.19 | 2  | 1.83  | 0.92 | 5.30  |



|   |   |    |   |   |       |      |       |    |      |      |       |
|---|---|----|---|---|-------|------|-------|----|------|------|-------|
| 1 | 2 | 13 | 3 | 3 | 18.30 | 2.30 | 29.42 | 3  | 2.87 | 0.96 | 6.75  |
| 1 | 2 | 13 | 3 | 4 | 19.90 | 2.25 | 29.80 | 3  | 2.92 | 0.97 | 4.61  |
| 1 | 2 | 13 | 3 | 5 | 8.40  | 2.04 | 10.94 | 8  | 6.51 | 0.81 | 13.85 |
| 1 | 2 | 13 | 3 | 6 | 11.20 | 2.02 | 12.94 | 6  | 5.90 | 0.98 | 12.85 |
| 1 | 2 | 13 | 3 | 7 | 9.80  | 2.15 | 9.39  | 4  | 3.62 | 0.91 | 7.88  |
| 1 | 2 | 13 | 3 | 8 | 12.20 | 2.10 | 14.13 | 6  | 6.45 | 1.08 | 8.82  |
| 1 | 2 | 12 | 1 | 1 | 14.40 | 2.09 | 17.81 | 7  | 4.03 | 0.58 | 7.13  |
| 1 | 2 | 12 | 1 | 2 | 9.80  | 2.45 | 10.33 | 5  | 2.57 | 0.51 | 3.66  |
| 1 | 2 | 12 | 1 | 3 | 19.10 | 2.18 | 27.14 | 12 | 7.03 | 0.59 | 9.97  |
| 1 | 2 | 12 | 1 | 4 | 10.20 | 1.85 | 8.60  | 3  | 1.02 | 0.34 | 3.88  |
| 1 | 2 | 12 | 1 | 5 | 10.60 | 1.81 | 8.67  | 4  | 1.83 | 0.46 | 3.27  |
| 1 | 2 | 12 | 1 | 6 | 11.40 | 2.09 | 11.27 | 3  | 1.21 | 0.40 | 4.99  |
| 1 | 2 | 12 | 1 | 7 | 11.00 | 1.71 | 9.00  | 5  | 2.18 | 0.44 | 3.09  |
| 1 | 2 | 12 | 1 | 8 | 8.40  | 2.00 | 9.92  | 4  | 2.05 | 0.51 | 5.18  |
| 1 | 2 | 12 | 2 | 1 | 11.40 | 1.91 | 9.94  | 4  | 1.97 | 0.49 | 4.36  |
| 1 | 2 | 12 | 2 | 2 | 12.00 | 1.94 | 13.49 | 6  | 2.81 | 0.47 | 5.66  |
| 1 | 2 | 12 | 2 | 3 | 13.00 | 2.15 | 18.65 | 7  | 3.90 | 0.56 | 7.57  |
| 1 | 2 | 12 | 2 | 4 | 17.80 | 2.15 | 23.84 | 12 | 6.33 | 0.53 | 3.62  |
| 1 | 2 | 12 | 2 | 5 | 10.70 | 1.90 | 10.13 | 4  | 1.84 | 0.46 | 4.00  |
| 1 | 2 | 12 | 2 | 6 | 13.00 | 2.00 | 15.27 | 7  | 3.66 | 0.52 | 4.39  |
| 1 | 2 | 12 | 2 | 7 | 11.70 | 1.84 | 10.85 | 5  | 2.49 | 0.50 | 6.23  |
| 1 | 2 | 12 | 2 | 8 | 7.40  | 1.88 | 8.64  | 4  | 2.05 | 0.51 | 8.29  |
| 1 | 2 | 12 | 3 | 1 | 18.30 | 2.23 | 22.65 | 5  | 2.92 | 0.58 | 5.21  |
| 1 | 2 | 12 | 3 | 2 | 12.10 | 1.90 | 16.42 | 8  | 3.12 | 0.39 | 6.84  |
| 1 | 2 | 12 | 3 | 3 | 11.60 | 2.19 | 16.28 | 9  | 5.04 | 0.56 | 7.40  |
| 1 | 2 | 12 | 3 | 4 | 14.60 | 2.29 | 16.42 | 8  | 4.84 | 0.61 | 9.76  |
| 1 | 2 | 12 | 3 | 5 | 17.50 | 2.05 | 25.37 | 11 | 6.36 | 0.58 | 8.84  |
| 1 | 2 | 12 | 3 | 6 | 13.70 | 2.20 | 16.42 | 10 | 5.68 | 0.57 | 8.95  |
| 1 | 2 | 12 | 3 | 7 | 14.80 | 2.05 | 19.43 | 2  | 1.18 | 0.59 | 2.81  |
| 1 | 2 | 12 | 3 | 8 | 12.20 | 1.95 | 13.90 | 6  | 3.35 | 0.56 | 6.57  |
| 1 | 2 | 11 | 1 | 1 | 13.20 | 1.74 | 11.85 | 6  | 3.65 | 0.61 | 3.68  |
| 1 | 2 | 11 | 1 | 2 | 10.20 | 1.66 | 9.44  | 4  | 2.63 | 0.66 | 3.03  |
| 1 | 2 | 11 | 1 | 3 | 15.80 | 1.72 | 16.62 | 7  | 4.71 | 0.67 | 5.34  |
| 1 | 2 | 11 | 1 | 4 | 16.40 | 1.78 | 18.82 | 9  | 6.71 | 0.75 | 6.05  |
| 1 | 2 | 11 | 1 | 5 | 14.10 | 1.89 | 14.67 | 5  | 6.03 | 1.21 | 4.97  |
| 1 | 2 | 11 | 1 | 6 | 12.00 | 1.65 | 11.08 | 7  | 4.30 | 0.61 | 4.03  |

|   |   |    |   |   |       |      |       |    |      |      |      |
|---|---|----|---|---|-------|------|-------|----|------|------|------|
| 1 | 2 | 11 | 1 | 7 | 12.80 | 1.50 | 11.66 | 6  | 3.94 | 0.66 | 4.03 |
| 1 | 2 | 11 | 1 | 8 | 11.30 | 1.55 | 10.14 | 5  | 2.90 | 0.58 | 3.18 |
| 1 | 2 | 11 | 2 | 1 | 15.80 | 1.88 | 19.29 | 5  | 3.35 | 0.67 | 3.18 |
| 1 | 2 | 11 | 2 | 2 | 16.20 | 1.70 | 17.90 | 4  | 2.80 | 0.70 | 4.85 |
| 1 | 2 | 11 | 2 | 3 | 12.90 | 1.45 | 13.66 | 7  | 5.67 | 0.81 | 5.76 |
| 1 | 2 | 11 | 2 | 4 | 17.10 | 1.82 | 17.13 | 5  | 3.63 | 0.73 | 5.71 |
| 1 | 2 | 11 | 2 | 5 | 12.40 | 1.80 | 13.66 | 4  | 3.05 | 0.76 | 4.68 |
| 1 | 2 | 11 | 2 | 6 | 15.20 | 1.76 | 15.90 | 5  | 4.18 | 0.84 | 7.89 |
| 1 | 2 | 11 | 2 | 7 | 13.40 | 1.59 | 12.70 | 4  | 2.86 | 0.72 | 3.81 |
| 1 | 2 | 11 | 2 | 8 | 7.80  | 2.00 | 9.49  | 6  | 3.40 | 0.57 | 3.98 |
| 1 | 2 | 11 | 3 | 1 | 13.60 | 1.50 | 10.60 | 9  | 6.51 | 0.72 | 5.82 |
| 1 | 2 | 11 | 3 | 2 | 9.40  | 1.79 | 9.95  | 7  | 5.51 | 0.79 | 6.26 |
| 1 | 2 | 11 | 3 | 3 | 15.60 | 1.86 | 17.00 | 8  | 5.00 | 0.63 | 4.29 |
| 1 | 2 | 11 | 3 | 4 | 12.30 | 1.84 | 12.09 | 9  | 5.96 | 0.66 | 5.19 |
| 1 | 2 | 11 | 3 | 5 | 12.80 | 1.85 | 13.10 | 6  | 4.14 | 0.69 | 4.42 |
| 1 | 2 | 11 | 3 | 6 | 14.70 | 1.86 | 16.24 | 8  | 5.33 | 0.67 | 4.88 |
| 1 | 2 | 11 | 3 | 7 | 14.20 | 1.65 | 11.83 | 5  | 3.57 | 0.71 | 4.92 |
| 1 | 2 | 11 | 3 | 8 | 9.60  | 1.80 | 9.83  | 3  | 2.73 | 0.91 | 3.57 |
| 1 | 2 | 10 | 1 | 1 | 10.30 | 2.14 | 12.50 | 5  | 4.11 | 0.82 | 2.94 |
| 1 | 2 | 10 | 1 | 2 | 13.00 | 1.88 | 22.55 | 8  | 7.53 | 0.94 | 6.16 |
| 1 | 2 | 10 | 1 | 3 | 13.00 | 2.12 | 15.66 | 7  | 6.65 | 0.95 | 3.46 |
| 1 | 2 | 10 | 1 | 4 | 9.20  | 2.15 | 14.18 | 6  | 5.12 | 0.85 | 3.36 |
| 1 | 2 | 10 | 1 | 5 | 12.80 | 2.25 | 23.14 | 8  | 6.85 | 0.86 | 7.02 |
| 1 | 2 | 10 | 1 | 6 | 14.40 | 2.10 | 22.90 | 8  | 6.67 | 0.83 | 4.57 |
| 1 | 2 | 10 | 1 | 7 | 12.50 | 2.11 | 25.50 | 9  | 7.98 | 0.89 | 7.20 |
| 1 | 2 | 10 | 1 | 8 | 12.00 | 2.15 | 18.69 | 7  | 5.58 | 0.80 | 4.56 |
| 1 | 2 | 10 | 2 | 1 | 14.40 | 2.20 | 24.65 | 8  | 6.31 | 0.79 | 8.83 |
| 1 | 2 | 10 | 2 | 2 | 12.50 | 2.20 | 19.57 | 7  | 5.20 | 0.74 | 6.82 |
| 1 | 2 | 10 | 2 | 3 | 13.20 | 2.30 | 24.12 | 9  | 7.16 | 0.80 | 8.08 |
| 1 | 2 | 10 | 2 | 4 | 13.20 | 2.06 | 19.15 | 6  | 4.48 | 0.75 | 7.50 |
| 1 | 2 | 10 | 2 | 5 | 12.80 | 2.20 | 19.42 | 7  | 5.21 | 0.74 | 6.37 |
| 1 | 2 | 10 | 2 | 6 | 13.60 | 2.16 | 20.36 | 9  | 6.76 | 0.75 | 5.67 |
| 1 | 2 | 10 | 2 | 7 | 14.10 | 2.25 | 22.75 | 10 | 7.61 | 0.76 | 6.94 |
| 1 | 2 | 10 | 2 | 8 | 12.20 | 2.30 | 23.07 | 8  | 6.60 | 0.83 | 7.95 |
| 1 | 2 | 10 | 3 | 1 | 14.50 | 1.92 | 17.51 | 4  | 3.19 | 0.80 | 2.83 |
| 1 | 2 | 10 | 3 | 2 | 14.40 | 2.15 | 24.66 | 5  | 4.40 | 0.88 | 4.82 |

|   |   |    |   |   |       |      |       |    |      |      |       |
|---|---|----|---|---|-------|------|-------|----|------|------|-------|
| 1 | 2 | 10 | 3 | 3 | 11.90 | 2.09 | 20.03 | 6  | 5.16 | 0.86 | 6.90  |
| 1 | 2 | 10 | 3 | 4 | 15.20 | 2.39 | 30.27 | 5  | 4.25 | 0.85 | 3.89  |
| 1 | 2 | 10 | 3 | 5 | 9.60  | 2.11 | 14.37 | 11 | 8.85 | 0.80 | 10.25 |
| 1 | 2 | 10 | 3 | 6 | 11.80 | 2.15 | 19.46 | 6  | 4.92 | 0.82 | 6.89  |
| 1 | 2 | 10 | 3 | 7 | 10.50 | 2.31 | 16.83 | 9  | 7.98 | 0.89 | 6.68  |
| 1 | 2 | 10 | 3 | 8 | 8.30  | 2.20 | 10.28 | 8  | 6.12 | 0.77 | 5.30  |
| 1 | 2 | 9  | 1 | 1 | 9.40  | 1.81 | 9.46  | 5  | 3.69 | 0.74 | 2.68  |
| 1 | 2 | 9  | 1 | 2 | 10.90 | 1.75 | 11.57 | 7  | 5.27 | 0.75 | 2.60  |
| 1 | 2 | 9  | 1 | 3 | 9.00  | 1.65 | 9.10  | 3  | 2.94 | 0.98 | 2.72  |
| 1 | 2 | 9  | 1 | 4 | 10.50 | 2.00 | 11.91 | 5  | 5.33 | 1.07 | 2.35  |
| 1 | 2 | 9  | 1 | 5 | 10.70 | 1.80 | 11.43 | 6  | 4.64 | 0.77 | 3.11  |
| 1 | 2 | 9  | 1 | 6 | 10.80 | 1.70 | 7.02  | 2  | 2.14 | 1.07 | 0.48  |
| 1 | 2 | 9  | 1 | 7 | 10.00 | 2.10 | 9.68  | 5  | 5.51 | 1.10 | 0.78  |
| 1 | 2 | 9  | 1 | 8 | 9.50  | 1.84 | 7.76  | 4  | 3.14 | 0.79 | 1.88  |
| 1 | 2 | 9  | 2 | 1 | 10.70 | 2.19 | 16.83 | 6  | 6.74 | 1.12 | 4.33  |
| 1 | 2 | 9  | 2 | 2 | 10.30 | 2.31 | 16.91 | 6  | 9.99 | 1.67 | 2.99  |
| 1 | 2 | 9  | 2 | 3 | 7.70  | 2.10 | 9.64  | 3  | 4.70 | 1.57 | 2.15  |
| 1 | 2 | 9  | 2 | 4 | 14.90 | 2.15 | 20.46 | 7  | 8.78 | 1.25 | 4.08  |
| 1 | 2 | 9  | 2 | 5 | 11.90 | 1.85 | 9.90  | 5  | 3.64 | 0.73 | 2.23  |
| 1 | 2 | 9  | 2 | 6 | 6.00  | 2.20 | 9.09  | 3  | 3.86 | 1.29 | 1.69  |
| 1 | 2 | 9  | 2 | 7 | 9.30  | 1.84 | 10.61 | 4  | 3.23 | 0.81 | 2.56  |
| 1 | 2 | 9  | 2 | 8 | 7.20  | 1.80 | 6.09  | 4  | 3.84 | 0.96 | 1.20  |
| 1 | 2 | 9  | 3 | 1 | 14.30 | 1.85 | 15.29 | 5  | 4.08 | 0.82 | 3.48  |
| 1 | 2 | 9  | 3 | 2 | 10.60 | 1.79 | 10.62 | 5  | 4.56 | 0.91 | 5.27  |
| 1 | 2 | 9  | 3 | 3 | 12.60 | 2.25 | 17.63 | 4  | 3.03 | 0.76 | 4.13  |
| 1 | 2 | 9  | 3 | 4 | 11.50 | 1.95 | 14.67 | 7  | 5.93 | 0.85 | 4.96  |
| 1 | 2 | 9  | 3 | 5 | 11.60 | 1.70 | 15.80 | 5  | 4.63 | 0.93 | 3.82  |
| 1 | 2 | 9  | 3 | 6 | 9.30  | 1.80 | 9.55  | 5  | 6.06 | 1.21 | 6.22  |
| 1 | 2 | 9  | 3 | 7 | 10.60 | 2.09 | 12.99 | 4  | 3.51 | 0.88 | 4.37  |
| 1 | 2 | 9  | 3 | 8 | 8.70  | 1.95 | 10.41 | 4  | 3.14 | 0.79 | 4.68  |
| 1 | 2 | 8  | 1 | 1 | 11.30 | 1.55 | 9.55  | 8  | 4.00 | 0.50 | 2.04  |
| 1 | 2 | 8  | 1 | 2 | 14.10 | 1.85 | 14.63 | 11 | 5.53 | 0.50 | 4.03  |
| 1 | 2 | 8  | 1 | 3 | 16.10 | 1.75 | 14.92 | 15 | 6.76 | 0.45 | 1.94  |
| 1 | 2 | 8  | 1 | 4 | 11.10 | 1.60 | 10.47 | 8  | 3.72 | 0.47 | 2.72  |
| 1 | 2 | 8  | 1 | 5 | 10.10 | 1.65 | 8.14  | 7  | 3.37 | 0.48 | 1.71  |
| 1 | 2 | 8  | 1 | 6 | 12.90 | 1.65 | 7.66  | 8  | 3.45 | 0.43 | 0.70  |

|   |   |   |   |   |       |      |       |    |      |      |      |
|---|---|---|---|---|-------|------|-------|----|------|------|------|
| 1 | 2 | 8 | 1 | 7 | 15.70 | 1.86 | 15.58 | 11 | 6.08 | 0.55 | 2.67 |
| 1 | 2 | 8 | 1 | 8 | 11.90 | 1.85 | 10.44 | 8  | 4.19 | 0.52 | 2.46 |
| 1 | 2 | 8 | 2 | 1 | 12.00 | 1.69 | 11.13 | 10 | 5.16 | 0.52 | 2.19 |
| 1 | 2 | 8 | 2 | 2 | 8.70  | 1.60 | 5.25  | 5  | 2.18 | 0.44 | 1.01 |
| 1 | 2 | 8 | 2 | 3 | 11.60 | 1.60 | 12.86 | 9  | 4.70 | 0.52 | 3.41 |
| 1 | 2 | 8 | 2 | 4 | 15.00 | 1.70 | 10.34 | 11 | 4.84 | 0.44 | 1.79 |
| 1 | 2 | 8 | 2 | 5 | 11.10 | 1.65 | 8.08  | 7  | 3.25 | 0.46 | 1.61 |
| 1 | 2 | 8 | 2 | 6 | 13.20 | 1.50 | 9.65  | 10 | 4.29 | 0.43 | 1.77 |
| 1 | 2 | 8 | 2 | 7 | 8.40  | 1.30 | 5.16  | 5  | 2.22 | 0.44 | 1.00 |
| 1 | 2 | 8 | 2 | 8 | 10.50 | 1.35 | 4.30  | 4  | 1.62 | 0.41 | 3.06 |
| 1 | 2 | 8 | 3 | 1 | 16.10 | 1.66 | 16.57 | 12 | 7.83 | 0.65 | 4.15 |
| 1 | 2 | 8 | 3 | 2 | 15.60 | 1.70 | 14.21 | 11 | 6.41 | 0.58 | 1.50 |
| 1 | 2 | 8 | 3 | 3 | 13.50 | 1.80 | 9.50  | 5  | 2.76 | 0.55 | 2.68 |
| 1 | 2 | 8 | 3 | 4 | 11.80 | 1.55 | 9.06  | 6  | 3.21 | 0.54 | 1.75 |
| 1 | 2 | 8 | 3 | 5 | 15.00 | 1.69 | 14.55 | 10 | 6.05 | 0.61 | 3.40 |
| 1 | 2 | 8 | 3 | 6 | 9.10  | 1.61 | 7.23  | 5  | 2.44 | 0.49 | 2.18 |
| 1 | 2 | 8 | 3 | 7 | 11.60 | 1.60 | 9.69  | 6  | 3.48 | 0.58 | 2.59 |
| 1 | 2 | 8 | 3 | 8 | 12.40 | 1.79 | 10.55 | 8  | 4.44 | 0.56 | 2.15 |
| 1 | 2 | 7 | 1 | 1 | 6.50  | 1.75 | 2.54  | 3  | 2.86 | 0.95 | 0.86 |
| 1 | 2 | 7 | 1 | 2 | 7.70  | 1.95 | 7.25  | 3  | 2.40 | 0.80 | 1.26 |
| 1 | 2 | 7 | 1 | 3 | 13.00 | 1.95 | 15.20 | 9  | 7.11 | 0.79 | 2.56 |
| 1 | 2 | 7 | 1 | 4 | 6.90  | 1.10 | 3.07  | 2  | 1.49 | 0.75 | 1.32 |
| 1 | 2 | 7 | 1 | 5 | 7.30  | 1.80 | 6.23  | 3  | 2.24 | 0.75 | 1.38 |
| 1 | 2 | 7 | 1 | 6 | 7.90  | 1.80 | 7.64  | 1  | 0.95 | 0.95 | 0.92 |
| 1 | 2 | 7 | 1 | 7 | 10.40 | 1.95 | 12.39 | 6  | 3.58 | 0.60 | 5.32 |
| 1 | 2 | 7 | 1 | 8 | 15.50 | 1.84 | 18.83 | 13 | 5.93 | 0.46 | 7.61 |
| 1 | 2 | 7 | 2 | 1 | 12.90 | 1.90 | 19.73 | 9  | 5.64 | 0.63 | 7.13 |
| 1 | 2 | 7 | 2 | 2 | 11.20 | 1.95 | 13.72 | 7  | 4.17 | 0.60 | 4.39 |
| 1 | 2 | 7 | 2 | 3 | 6.50  | 1.86 | 6.04  | 3  | 1.63 | 0.54 | 1.65 |
| 1 | 2 | 7 | 2 | 4 | 9.80  | 2.00 | 8.84  | 4  | 2.34 | 0.59 | 2.74 |
| 1 | 2 | 7 | 2 | 5 | 7.50  | 1.89 | 8.28  | 4  | 2.24 | 0.56 | 2.90 |
| 1 | 2 | 7 | 2 | 6 | 10.60 | 1.55 | 6.95  | 3  | 1.14 | 0.38 | 1.64 |
| 1 | 2 | 7 | 2 | 7 | 11.90 | 1.90 | 11.82 | 6  | 2.70 | 0.45 | 4.54 |
| 1 | 2 | 7 | 2 | 8 | 7.50  | 1.90 | 4.98  | 2  | 1.16 | 0.58 | 1.09 |
| 1 | 2 | 7 | 3 | 1 | 9.60  | 1.70 | 8.47  | 4  | 2.45 | 0.61 | 2.33 |
| 1 | 2 | 7 | 3 | 2 | 9.20  | 1.75 | 8.84  | 5  | 2.15 | 0.43 | 3.02 |

|   |   |   |   |   |       |      |       |    |       |      |       |
|---|---|---|---|---|-------|------|-------|----|-------|------|-------|
| 1 | 2 | 7 | 3 | 3 | 10.50 | 1.80 | 12.96 | 7  | 3.74  | 0.53 | 3.96  |
| 1 | 2 | 7 | 3 | 4 | 6.90  | 1.95 | 6.02  | 3  | 1.71  | 0.57 | 2.39  |
| 1 | 2 | 7 | 3 | 5 | 7.90  | 1.80 | 6.15  | 4  | 2.25  | 0.56 | 2.01  |
| 1 | 2 | 7 | 3 | 6 | 8.30  | 1.76 | 5.43  | 1  | 0.57  | 0.57 | 1.92  |
| 1 | 2 | 7 | 3 | 7 | 7.50  | 1.70 | 4.30  | 2  | 0.58  | 0.29 | 1.88  |
| 1 | 2 | 7 | 3 | 8 | 7.30  | 1.65 | 4.45  | 2  | 0.94  | 0.47 | 1.68  |
| 1 | 2 | 6 | 1 | 1 | 13.60 | 1.65 | 7.13  | 2  | 1.34  | 0.67 | 1.68  |
| 1 | 2 | 6 | 1 | 2 | 11.90 | 1.95 | 12.48 | 3  | 2.69  | 0.90 | 2.67  |
| 1 | 2 | 6 | 1 | 3 | 8.50  | 1.75 | 3.13  | 5  | 3.29  | 0.66 | 1.57  |
| 1 | 2 | 6 | 1 | 4 | 8.40  | 1.61 | 4.98  | 11 | 7.36  | 0.67 | 10.80 |
| 1 | 2 | 6 | 1 | 5 | 15.40 | 7.05 | 19.19 | 3  | 2.21  | 0.74 | 4.57  |
| 1 | 2 | 6 | 1 | 6 | 7.00  | 1.62 | 3.16  | 3  | 1.26  | 0.42 | 3.58  |
| 1 | 2 | 6 | 1 | 7 | 8.20  | 1.64 | 3.81  | 2  | 0.73  | 0.37 | 2.98  |
| 1 | 2 | 6 | 1 | 8 | 6.40  | 1.60 | 2.67  | 2  | 0.96  | 0.48 | 2.11  |
| 1 | 2 | 6 | 2 | 1 | 6.60  | 1.30 | 1.43  | 7  | 6.34  | 0.91 | 5.32  |
| 1 | 2 | 6 | 2 | 2 | 7.80  | 1.40 | 1.76  | 6  | 4.89  | 0.82 | 4.44  |
| 1 | 2 | 6 | 2 | 3 | 7.20  | 1.49 | 1.96  | 4  | 4.08  | 1.02 | 2.86  |
| 1 | 2 | 6 | 2 | 4 | 7.30  | 1.36 | 1.70  | 6  | 5.66  | 0.94 | 4.07  |
| 1 | 2 | 6 | 2 | 5 | 6.90  | 1.41 | 1.60  | 3  | 2.81  | 0.94 | 2.44  |
| 1 | 2 | 6 | 2 | 6 | 5.80  | 1.55 | 1.54  | 2  | 1.29  | 0.65 | 2.07  |
| 1 | 2 | 6 | 2 | 7 | 17.50 | 2.10 | 31.59 | 8  | 12.22 | 1.53 | 4.21  |
| 1 | 2 | 6 | 2 | 8 | 12.70 | 1.88 | 17.12 | 3  | 3.37  | 1.12 | 1.79  |
| 1 | 2 | 6 | 3 | 1 | 7.60  | 1.92 | 3.18  | 2  | 0.51  | 0.26 | 1.29  |
| 1 | 2 | 6 | 3 | 2 | 8.50  | 1.60 | 4.47  | 3  | 0.99  | 0.33 | 1.85  |
| 1 | 2 | 6 | 3 | 3 | 8.60  | 1.55 | 3.51  | 2  | 0.80  | 0.40 | 2.20  |
| 1 | 2 | 6 | 3 | 4 | 6.50  | 1.34 | 2.72  | 2  | 0.79  | 0.40 | 1.61  |
| 1 | 2 | 6 | 3 | 5 | 6.80  | 1.39 | 3.08  | 2  | 0.86  | 0.43 | 1.94  |
| 1 | 2 | 6 | 3 | 6 | 5.10  | 1.57 | 2.74  | 1  | 0.45  | 0.45 | 1.40  |
| 1 | 2 | 6 | 3 | 7 | 8.70  | 1.31 | 2.52  | 1  | 0.18  | 0.18 | 0.17  |
| 1 | 2 | 6 | 3 | 8 | 7.90  | 1.30 | 2.80  | 2  | 0.94  | 0.47 | 1.49  |
| 1 | 2 | 4 | 1 | 1 | 13.40 | 2.04 | 15.40 | 6  | 6.64  | 1.11 | 3.08  |
| 1 | 2 | 4 | 1 | 2 | 10.50 | 2.33 | 14.00 | 4  | 5.37  | 1.34 | 4.12  |
| 1 | 2 | 4 | 1 | 3 | 13.60 | 2.10 | 17.66 | 6  | 6.53  | 1.09 | 4.78  |
| 1 | 2 | 4 | 1 | 4 | 13.70 | 2.13 | 17.06 | 6  | 8.87  | 1.48 | 4.40  |
| 1 | 2 | 4 | 1 | 5 | 13.60 | 1.79 | 20.12 | 6  | 8.50  | 1.42 | 3.44  |
| 1 | 2 | 4 | 1 | 6 | 13.00 | 1.98 | 10.76 | 4  | 4.12  | 1.03 | 2.68  |

|   |   |   |   |   |       |      |       |    |       |      |      |
|---|---|---|---|---|-------|------|-------|----|-------|------|------|
| 1 | 2 | 4 | 1 | 7 | 9.80  | 1.93 | 6.13  | 2  | 2.09  | 1.05 | 1.94 |
| 1 | 2 | 4 | 1 | 8 | 8.90  | 1.86 | 8.67  | 5  | 7.20  | 1.44 | 2.32 |
| 1 | 2 | 4 | 2 | 1 | 11.90 | 1.70 | 13.44 | 4  | 5.18  | 1.30 | 1.71 |
| 1 | 2 | 4 | 2 | 2 | 11.20 | 2.06 | 13.50 | 5  | 5.55  | 1.11 | 2.88 |
| 1 | 2 | 4 | 2 | 3 | 11.10 | 2.10 | 15.34 | 2  | 2.68  | 1.34 | 1.63 |
| 1 | 2 | 4 | 2 | 4 | 11.20 | 2.20 | 13.57 | 4  | 5.62  | 1.41 | 4.73 |
| 1 | 2 | 4 | 2 | 5 | 10.50 | 1.80 | 15.47 | 5  | 7.36  | 1.47 | 2.59 |
| 1 | 2 | 4 | 2 | 6 | 12.80 | 1.90 | 17.12 | 3  | 3.73  | 1.24 | 1.75 |
| 1 | 2 | 4 | 2 | 7 | 11.00 | 2.00 | 10.63 | 2  | 2.36  | 1.18 | 0.72 |
| 1 | 2 | 4 | 2 | 8 | 11.00 | 2.09 | 7.44  | 2  | 1.83  | 0.92 | 1.25 |
| 1 | 2 | 4 | 3 | 1 | 10.10 | 2.15 | 6.48  | 3  | 2.89  | 0.96 | 2.63 |
| 1 | 2 | 4 | 3 | 2 | 9.50  | 1.99 | 6.45  | 2  | 2.24  | 1.12 | 2.86 |
| 1 | 2 | 4 | 3 | 3 | 14.90 | 1.85 | 15.52 | 4  | 4.88  | 1.22 | 2.16 |
| 1 | 2 | 4 | 3 | 4 | 16.70 | 2.15 | 28.91 | 7  | 11.72 | 1.67 | 5.64 |
| 1 | 2 | 4 | 3 | 5 | 18.50 | 2.25 | 32.59 | 8  | 13.22 | 1.65 | 4.51 |
| 1 | 2 | 4 | 3 | 6 | 12.80 | 2.19 | 10.73 | 4  | 4.70  | 1.18 | 2.81 |
| 1 | 2 | 4 | 3 | 7 | 13.30 | 2.14 | 14.87 | 3  | 3.45  | 1.15 | 1.88 |
| 1 | 2 | 4 | 3 | 8 | 9.00  | 2.04 | 18.28 | 3  | 4.39  | 1.46 | 2.05 |
| 1 | 1 | 9 | 1 | 1 | 11.00 | 1.75 | 12.90 | 7  | 3.90  | 0.56 | 4.98 |
| 1 | 1 | 9 | 1 | 2 | 10.30 | 1.86 | 13.08 | 5  | 3.34  | 0.67 | 4.28 |
| 1 | 1 | 9 | 1 | 3 | 9.90  | 2.00 | 7.41  | 6  | 2.57  | 0.43 | 1.75 |
| 1 | 1 | 9 | 1 | 4 | 9.60  | 2.15 | 10.19 | 6  | 4.10  | 0.68 | 4.25 |
| 1 | 1 | 9 | 1 | 5 | 15.20 | 1.90 | 22.76 | 12 | 6.83  | 0.57 | 4.07 |
| 1 | 1 | 9 | 1 | 6 | 9.00  | 2.15 | 8.47  | 5  | 3.04  | 0.61 | 3.07 |
| 1 | 1 | 9 | 1 | 7 | 9.00  | 1.90 | 10.46 | 6  | 1.99  | 0.33 | 1.97 |
| 1 | 1 | 9 | 1 | 8 | 9.10  | 1.75 | 9.90  | 7  | 3.40  | 0.49 | 2.68 |
| 1 | 1 | 9 | 2 | 1 | 10.30 | 2.00 | 10.19 | 4  | 2.50  | 0.63 | 3.14 |
| 1 | 1 | 9 | 2 | 2 | 11.00 | 1.84 | 9.55  | 6  | 2.66  | 0.44 | 6.28 |
| 1 | 1 | 9 | 2 | 3 | 13.40 | 2.14 | 24.36 | 6  | 3.98  | 0.66 | 2.17 |
| 1 | 1 | 9 | 2 | 4 | 10.20 | 1.86 | 13.88 | 12 | 7.54  | 0.63 | 3.90 |
| 1 | 1 | 9 | 2 | 5 | 15.30 | 1.99 | 23.56 | 11 | 7.06  | 0.64 | 5.66 |
| 1 | 1 | 9 | 2 | 6 | 15.00 | 2.14 | 19.60 | 11 | 6.74  | 0.61 | 5.39 |
| 1 | 1 | 9 | 2 | 7 | 9.90  | 1.89 | 9.03  | 3  | 1.88  | 0.63 | 1.69 |
| 1 | 1 | 9 | 2 | 8 | 9.20  | 1.83 | 8.38  | 4  | 2.00  | 0.50 | 2.07 |
| 1 | 1 | 9 | 3 | 1 | 11.60 | 2.10 | 8.18  | 2  | 0.30  | 0.15 | 4.61 |
| 1 | 1 | 9 | 3 | 2 | 10.90 | 1.84 | 13.06 | 2  | 0.97  | 0.49 | 5.29 |

|   |   |    |   |   |       |      |       |    |      |      |      |
|---|---|----|---|---|-------|------|-------|----|------|------|------|
| 1 | 1 | 9  | 3 | 3 | 11.50 | 2.13 | 13.03 | 6  | 3.81 | 0.64 | 3.64 |
| 1 | 1 | 9  | 3 | 4 | 13.40 | 1.80 | 13.47 | 4  | 1.56 | 0.39 | 6.30 |
| 1 | 1 | 9  | 3 | 5 | 11.20 | 2.02 | 15.47 | 5  | 3.69 | 0.74 | 3.84 |
| 1 | 1 | 9  | 3 | 6 | 10.90 | 2.28 | 15.09 | 7  | 4.10 | 0.59 | 2.71 |
| 1 | 1 | 9  | 3 | 7 | 9.70  | 1.53 | 9.35  | 7  | 2.74 | 0.39 | 3.21 |
| 1 | 1 | 9  | 3 | 8 | 7.10  | 1.59 | 6.17  | 3  | 1.55 | 0.52 | 2.64 |
| 1 | 1 | 11 | 1 | 1 | 8.20  | 2.10 | 13.01 | 4  | 4.53 | 1.13 | 1.89 |
| 1 | 1 | 11 | 1 | 2 | 8.90  | 1.90 | 13.38 | 4  | 4.03 | 1.01 | 3.36 |
| 1 | 1 | 11 | 1 | 3 | 6.20  | 2.18 | 5.75  | 3  | 2.47 | 0.82 | 1.40 |
| 1 | 1 | 11 | 1 | 4 | 7.00  | 1.87 | 9.89  | 3  | 3.53 | 1.18 | 1.95 |
| 1 | 1 | 11 | 1 | 5 | 12.40 | 2.09 | 13.20 | 8  | 5.96 | 0.75 | 2.81 |
| 1 | 1 | 11 | 1 | 6 | 5.40  | 1.96 | 5.92  | 3  | 2.77 | 0.92 | 1.69 |
| 1 | 1 | 11 | 1 | 7 | 8.10  | 1.84 | 4.40  | 2  | 1.05 | 0.53 | 1.69 |
| 1 | 1 | 11 | 1 | 8 | 6.50  | 2.03 | 6.45  | 3  | 2.50 | 0.83 | 1.64 |
| 1 | 1 | 11 | 2 | 1 | 14.81 | 2.35 | 22.73 | 7  | 6.72 | 0.96 | 8.28 |
| 1 | 1 | 11 | 2 | 2 | 12.73 | 2.03 | 17.92 | 7  | 6.25 | 0.89 | 5.21 |
| 1 | 1 | 11 | 2 | 3 | 13.40 | 2.10 | 18.87 | 7  | 6.42 | 0.92 | 7.72 |
| 1 | 1 | 11 | 2 | 4 | 10.00 | 2.09 | 12.54 | 5  | 4.62 | 0.92 | 4.37 |
| 1 | 1 | 11 | 2 | 5 | 12.10 | 2.20 | 16.56 | 10 | 7.90 | 0.79 | 7.17 |
| 1 | 1 | 11 | 2 | 6 | 15.50 | 2.00 | 21.48 | 5  | 5.28 | 1.06 | 6.25 |
| 1 | 1 | 11 | 2 | 7 | 10.00 | 1.84 | 13.20 | 8  | 4.91 | 0.61 | 3.89 |
| 1 | 1 | 11 | 2 | 8 | 13.90 | 2.18 | 21.55 | 8  | 7.90 | 0.99 | 7.34 |
| 1 | 1 | 11 | 3 | 1 | 13.60 | 2.09 | 16.80 | 6  | 4.85 | 0.81 | 7.42 |
| 1 | 1 | 11 | 3 | 2 | 15.40 | 2.34 | 21.33 | 5  | 5.24 | 1.05 | 9.13 |
| 1 | 1 | 11 | 3 | 3 | 14.40 | 2.10 | 23.33 | 9  | 8.44 | 0.94 | 8.90 |
| 1 | 1 | 11 | 3 | 4 | 12.30 | 2.10 | 18.20 | 8  | 6.89 | 0.86 | 6.42 |
| 1 | 1 | 11 | 3 | 5 | 11.60 | 2.10 | 17.98 | 8  | 7.22 | 0.90 | 5.57 |
| 1 | 1 | 11 | 3 | 6 | 10.80 | 1.88 | 15.06 | 5  | 5.01 | 1.00 | 5.67 |
| 1 | 1 | 11 | 3 | 7 | 12.50 | 2.29 | 17.12 | 6  | 5.76 | 0.96 | 6.14 |
| 1 | 1 | 11 | 3 | 8 | 11.60 | 1.37 | 10.40 | 6  | 3.81 | 0.64 | 3.21 |
| 1 | 1 | 13 | 1 | 1 | 12.80 | 2.05 | 14.41 | 5  | 2.60 | 0.52 | 4.53 |
| 1 | 1 | 13 | 1 | 2 | 10.80 | 1.80 | 8.29  | 4  | 2.42 | 0.61 | 3.02 |
| 1 | 1 | 13 | 1 | 3 | 16.60 | 1.90 | 19.05 | 5  | 2.95 | 0.59 | 7.88 |
| 1 | 1 | 13 | 1 | 4 | 14.80 | 2.25 | 17.11 | 3  | 2.50 | 0.83 | 4.15 |
| 1 | 1 | 13 | 1 | 5 | 10.20 | 2.35 | 8.63  | 1  | 0.86 | 0.86 | 2.58 |
| 1 | 1 | 13 | 1 | 6 | 14.00 | 2.07 | 18.33 | 10 | 6.10 | 0.61 | 8.82 |

|   |   |    |   |   |       |      |       |    |       |      |       |
|---|---|----|---|---|-------|------|-------|----|-------|------|-------|
| 1 | 1 | 13 | 1 | 7 | 9.60  | 1.54 | 7.93  | 2  | 0.87  | 0.44 | 2.95  |
| 1 | 1 | 13 | 1 | 8 | 7.50  | 1.88 | 7.14  | 1  | 0.80  | 0.80 | 3.90  |
| 1 | 1 | 13 | 2 | 1 | 12.80 | 2.13 | 16.65 | 3  | 2.32  | 0.77 | 7.25  |
| 1 | 1 | 13 | 2 | 2 | 12.50 | 1.80 | 15.75 | 11 | 5.50  | 0.50 | 3.90  |
| 1 | 1 | 13 | 2 | 3 | 12.70 | 2.16 | 20.52 | 6  | 4.88  | 0.81 | 7.78  |
| 1 | 1 | 13 | 2 | 4 | 14.50 | 1.89 | 17.85 | 7  | 4.36  | 0.62 | 5.88  |
| 1 | 1 | 13 | 2 | 5 | 15.00 | 2.14 | 24.02 | 11 | 7.33  | 0.67 | 7.22  |
| 1 | 1 | 13 | 2 | 6 | 13.10 | 2.05 | 16.24 | 2  | 1.08  | 0.54 | 5.10  |
| 1 | 1 | 13 | 2 | 7 | 14.50 | 2.14 | 24.51 | 8  | 5.04  | 0.63 | 4.90  |
| 1 | 1 | 13 | 2 | 8 | 11.60 | 1.94 | 11.62 | 4  | 3.45  | 0.86 | 4.17  |
| 1 | 1 | 13 | 3 | 1 | 16.70 | 1.95 | 22.90 | 8  | 5.16  | 0.65 | 6.64  |
| 1 | 1 | 13 | 3 | 2 | 9.20  | 1.99 | 8.02  | 4  | 1.88  | 0.47 | 3.02  |
| 1 | 1 | 13 | 3 | 3 | 13.40 | 1.86 | 12.54 | 5  | 3.29  | 0.66 | 3.94  |
| 1 | 1 | 13 | 3 | 4 | 8.30  | 2.20 | 10.86 | 6  | 5.41  | 0.90 | 4.63  |
| 1 | 1 | 13 | 3 | 5 | 10.00 | 2.19 | 12.90 | 6  | 3.97  | 0.66 | 3.85  |
| 1 | 1 | 13 | 3 | 6 | 10.70 | 2.04 | 13.42 | 4  | 2.60  | 0.65 | 4.92  |
| 1 | 1 | 13 | 3 | 7 | 11.10 | 2.24 | 18.62 | 11 | 8.30  | 0.75 | 5.14  |
| 1 | 1 | 13 | 3 | 8 | 9.90  | 2.09 | 8.65  | 3  | 1.05  | 0.35 | 2.94  |
| 1 | 1 | 15 | 1 | 1 | 17.00 | 2.24 | 30.04 | 7  | 4.53  | 0.65 | 11.80 |
| 1 | 1 | 15 | 1 | 2 | 22.00 | 2.44 | 38.89 | 15 | 10.31 | 0.69 | 14.99 |
| 1 | 1 | 15 | 1 | 3 | 19.00 | 2.26 | 30.44 | 8  | 5.65  | 0.71 | 12.98 |
| 1 | 1 | 15 | 1 | 4 | 13.90 | 2.19 | 27.09 | 5  | 3.71  | 0.74 | 6.36  |
| 1 | 1 | 15 | 1 | 5 | 17.50 | 2.15 | 28.14 | 10 | 5.60  | 0.56 | 11.75 |
| 1 | 1 | 15 | 1 | 6 | 18.20 | 2.50 | 18.20 | 7  | 5.06  | 0.72 | 12.17 |
| 1 | 1 | 15 | 1 | 7 | 13.50 | 2.05 | 18.53 | 8  | 4.84  | 0.61 | 9.02  |
| 1 | 1 | 15 | 1 | 8 | 17.80 | 2.21 | 28.74 | 10 | 7.13  | 0.71 | 12.03 |
| 1 | 1 | 15 | 2 | 1 | 18.40 | 2.10 | 26.84 | 13 | 7.60  | 0.58 | 8.59  |
| 1 | 1 | 15 | 2 | 2 | 17.40 | 2.07 | 21.96 | 12 | 5.90  | 0.49 | 8.20  |
| 1 | 1 | 15 | 2 | 3 | 11.50 | 2.10 | 16.46 | 6  | 4.46  | 0.74 | 5.65  |
| 1 | 1 | 15 | 2 | 4 | 14.70 | 2.14 | 15.91 | 4  | 2.39  | 0.60 | 6.35  |
| 1 | 1 | 15 | 2 | 5 | 12.40 | 1.89 | 13.05 | 5  | 2.31  | 0.46 | 6.10  |
| 1 | 1 | 15 | 2 | 6 | 13.20 | 2.06 | 25.67 | 7  | 5.06  | 0.72 | 10.20 |
| 1 | 1 | 15 | 2 | 7 | 14.60 | 2.05 | 22.32 | 9  | 6.38  | 0.71 | 8.60  |
| 1 | 1 | 15 | 2 | 8 | 13.30 | 2.14 | 21.23 | 10 | 7.42  | 0.74 | 7.45  |
| 1 | 1 | 15 | 3 | 1 | 14.70 | 2.19 | 18.12 | 7  | 3.59  | 0.51 | 6.65  |
| 1 | 1 | 15 | 3 | 2 | 14.80 | 2.15 | 24.65 | 8  | 5.00  | 0.63 | 9.35  |



|   |   |    |   |   |       |      |       |    |      |      |       |
|---|---|----|---|---|-------|------|-------|----|------|------|-------|
| 1 | 1 | 15 | 3 | 3 | 10.80 | 2.04 | 14.18 | 4  | 1.28 | 0.32 | 7.62  |
| 1 | 1 | 15 | 3 | 4 | 12.60 | 2.14 | 16.64 | 7  | 3.17 | 0.45 | 7.62  |
| 1 | 1 | 15 | 3 | 5 | 11.40 | 2.14 | 14.15 | 4  | 1.76 | 0.44 | 7.49  |
| 1 | 1 | 15 | 3 | 6 | 18.20 | 2.44 | 26.85 | 7  | 2.56 | 0.37 | 12.65 |
| 1 | 1 | 15 | 3 | 7 | 12.60 | 2.43 | 16.22 | 6  | 2.98 | 0.50 | 7.28  |
| 1 | 1 | 15 | 3 | 8 | 13.10 | 2.14 | 17.90 | 8  | 3.18 | 0.40 | 8.62  |
| 1 | 1 | 18 | 1 | 1 | 11.80 | 1.84 | 12.25 | 8  | 4.85 | 0.61 | 4.06  |
| 1 | 1 | 18 | 1 | 2 | 9.90  | 1.79 | 10.57 | 6  | 2.40 | 0.40 | 3.34  |
| 1 | 1 | 18 | 1 | 3 | 9.20  | 1.83 | 11.11 | 5  | 3.30 | 0.66 | 4.97  |
| 1 | 1 | 18 | 1 | 4 | 8.70  | 2.03 | 11.90 | 5  | 3.16 | 0.63 | 5.30  |
| 1 | 1 | 18 | 1 | 5 | 7.20  | 2.15 | 11.38 | 6  | 4.88 | 0.81 | 3.30  |
| 1 | 1 | 18 | 1 | 6 | 11.80 | 1.97 | 19.12 | 10 | 7.04 | 0.70 | 3.79  |
| 1 | 1 | 18 | 1 | 7 | 9.20  | 2.11 | 11.12 | 5  | 3.50 | 0.70 | 3.18  |
| 1 | 1 | 18 | 1 | 8 | 8.50  | 1.65 | 10.82 | 6  | 3.72 | 0.62 | 4.62  |
| 1 | 1 | 18 | 2 | 1 | 10.90 | 1.94 | 14.37 | 4  | 2.95 | 0.74 | 4.95  |
| 1 | 1 | 18 | 2 | 2 | 11.20 | 2.19 | 18.97 | 7  | 2.51 | 0.36 | 5.56  |
| 1 | 1 | 18 | 2 | 3 | 11.30 | 1.85 | 17.35 | 7  | 3.95 | 0.56 | 5.36  |
| 1 | 1 | 18 | 2 | 4 | 11.20 | 1.98 | 19.23 | 11 | 5.91 | 0.54 | 4.61  |
| 1 | 1 | 18 | 2 | 5 | 11.80 | 2.23 | 20.53 | 6  | 4.70 | 0.78 | 7.92  |
| 1 | 1 | 18 | 2 | 6 | 12.80 | 2.08 | 20.68 | 9  | 6.45 | 0.72 | 6.85  |
| 1 | 1 | 18 | 2 | 7 | 10.70 | 1.90 | 14.65 | 6  | 3.50 | 0.58 | 5.28  |
| 1 | 1 | 18 | 2 | 8 | 10.70 | 1.85 | 15.65 | 9  | 4.80 | 0.53 | 6.34  |
| 1 | 1 | 18 | 3 | 1 | 12.50 | 1.94 | 21.72 | 7  | 5.36 | 0.77 | 5.42  |
| 1 | 1 | 18 | 3 | 2 | 11.30 | 2.04 | 16.07 | 9  | 5.87 | 0.65 | 3.67  |
| 1 | 1 | 18 | 3 | 3 | 10.92 | 2.24 | 14.65 | 7  | 4.56 | 0.65 | 3.81  |
| 1 | 1 | 18 | 3 | 4 | 11.10 | 2.01 | 14.99 | 11 | 6.10 | 0.55 | 3.15  |
| 1 | 1 | 18 | 3 | 5 | 11.20 | 2.33 | 22.60 | 10 | 7.37 | 0.74 | 4.62  |
| 1 | 1 | 18 | 3 | 6 | 13.50 | 2.20 | 23.90 | 10 | 7.44 | 0.74 | 5.40  |
| 1 | 1 | 18 | 3 | 7 | 9.70  | 2.13 | 11.62 | 6  | 4.21 | 0.70 | 3.41  |
| 1 | 1 | 18 | 3 | 8 | 9.50  | 1.70 | 9.80  | 6  | 3.88 | 0.65 | 3.46  |
| 1 | 1 | 17 | 1 | 1 | 13.30 | 2.29 | 18.36 | 7  | 6.46 | 0.92 | 6.12  |
| 1 | 1 | 17 | 1 | 2 | 12.00 | 2.31 | 21.54 | 6  | 6.68 | 1.11 | 5.60  |
| 1 | 1 | 17 | 1 | 3 | 14.10 | 2.28 | 24.11 | 7  | 7.22 | 1.03 | 7.45  |
| 1 | 1 | 17 | 1 | 4 | 10.40 | 2.09 | 11.26 | 3  | 2.42 | 0.81 | 4.20  |
| 1 | 1 | 17 | 1 | 5 | 12.60 | 2.28 | 17.37 | 4  | 5.78 | 1.45 | 5.27  |
| 1 | 1 | 17 | 1 | 6 | 11.30 | 2.29 | 19.06 | 7  | 6.14 | 0.88 | 6.00  |

|   |   |    |   |   |       |      |       |    |       |      |       |
|---|---|----|---|---|-------|------|-------|----|-------|------|-------|
| 1 | 1 | 17 | 1 | 7 | 8.00  | 2.04 | 15.87 | 4  | 5.04  | 1.26 | 5.56  |
| 1 | 1 | 17 | 1 | 8 | 9.00  | 2.35 | 14.36 | 4  | 5.17  | 1.29 | 3.47  |
| 1 | 1 | 17 | 2 | 1 | 14.70 | 2.35 | 24.30 | 6  | 6.81  | 1.14 | 8.37  |
| 1 | 1 | 17 | 2 | 2 | 15.80 | 2.15 | 26.04 | 8  | 7.37  | 0.92 | 8.24  |
| 1 | 1 | 17 | 2 | 3 | 9.90  | 2.10 | 14.97 | 4  | 4.42  | 1.11 | 5.63  |
| 1 | 1 | 17 | 2 | 4 | 10.00 | 2.39 | 15.53 | 5  | 5.02  | 1.00 | 4.72  |
| 1 | 1 | 17 | 2 | 5 | 14.70 | 2.28 | 29.31 | 8  | 7.94  | 0.99 | 9.86  |
| 1 | 1 | 17 | 2 | 6 | 13.70 | 2.35 | 24.01 | 15 | 13.51 | 0.90 | 17.83 |
| 1 | 1 | 17 | 2 | 7 | 12.70 | 2.19 | 26.80 | 5  | 6.06  | 1.21 | 6.16  |
| 1 | 1 | 17 | 2 | 8 | 16.20 | 2.33 | 16.40 | 9  | 7.80  | 0.87 | 10.11 |
| 1 | 1 | 17 | 3 | 1 | 13.80 | 2.08 | 19.29 | 6  | 5.09  | 0.85 | 7.63  |
| 1 | 1 | 17 | 3 | 2 | 19.00 | 2.21 | 30.10 | 9  | 8.82  | 0.98 | 10.14 |
| 1 | 1 | 17 | 3 | 3 | 13.20 | 2.16 | 23.26 | 15 | 13.51 | 0.90 | 17.83 |
| 1 | 1 | 17 | 3 | 4 | 14.00 | 1.98 | 23.09 | 6  | 5.14  | 0.86 | 7.01  |
| 1 | 1 | 17 | 3 | 5 | 12.30 | 2.20 | 16.72 | 8  | 8.24  | 1.03 | 8.25  |
| 1 | 1 | 17 | 3 | 6 | 15.30 | 2.13 | 25.36 | 7  | 7.80  | 1.11 | 11.37 |
| 1 | 1 | 17 | 3 | 7 | 17.20 | 2.34 | 34.02 | 6  | 6.04  | 1.01 | 4.04  |
| 1 | 1 | 17 | 3 | 8 | 16.60 | 2.30 | 27.82 | 9  | 9.92  | 1.10 | 10.62 |
| 1 | 1 | 20 | 1 | 1 | 13.00 | 1.90 | 23.10 | 11 | 9.30  | 0.85 | 3.00  |
| 1 | 1 | 20 | 1 | 2 | 11.40 | 2.05 | 23.26 | 11 | 9.06  | 0.82 | 5.31  |
| 1 | 1 | 20 | 1 | 3 | 11.90 | 2.05 | 18.03 | 10 | 7.93  | 0.79 | 3.84  |
| 1 | 1 | 20 | 1 | 4 | 8.80  | 2.30 | 12.27 | 6  | 5.43  | 0.91 | 2.27  |
| 1 | 1 | 20 | 1 | 5 | 9.90  | 2.20 | 13.89 | 6  | 5.67  | 0.95 | 2.32  |
| 1 | 1 | 20 | 1 | 6 | 6.90  | 1.97 | 9.61  | 4  | 3.53  | 0.88 | 2.04  |
| 1 | 1 | 20 | 1 | 7 | 6.70  | 1.91 | 6.88  | 4  | 3.35  | 0.84 | 2.15  |
| 1 | 1 | 20 | 1 | 8 | 6.60  | 1.80 | 8.44  | 4  | 3.48  | 0.87 | 1.90  |
| 1 | 1 | 20 | 2 | 1 | 10.80 | 1.96 | 19.17 | 9  | 8.11  | 0.90 | 3.90  |
| 1 | 1 | 20 | 2 | 2 | 10.00 | 2.05 | 11.99 | 6  | 4.49  | 0.75 | 1.74  |
| 1 | 1 | 20 | 2 | 3 | 6.60  | 2.34 | 9.59  | 5  | 5.00  | 1.00 | 1.83  |
| 1 | 1 | 20 | 2 | 4 | 9.40  | 1.80 | 12.36 | 6  | 5.40  | 0.90 | 1.84  |
| 1 | 1 | 20 | 2 | 5 | 9.70  | 2.34 | 14.53 | 6  | 6.32  | 1.05 | 2.25  |
| 1 | 1 | 20 | 2 | 6 | 11.10 | 2.28 | 13.86 | 6  | 5.69  | 0.95 | 3.02  |
| 1 | 1 | 20 | 2 | 7 | 8.60  | 2.06 | 11.67 | 5  | 4.92  | 0.98 | 2.33  |
| 1 | 1 | 20 | 2 | 8 | 6.90  | 1.86 | 7.61  | 4  | 2.84  | 0.71 | 0.90  |
| 1 | 1 | 20 | 3 | 1 | 12.20 | 2.10 | 22.09 | 9  | 7.46  | 0.83 | 4.10  |
| 1 | 1 | 20 | 3 | 2 | 13.50 | 1.94 | 26.22 | 12 | 9.35  | 0.78 | 3.96  |

|   |   |    |   |   |       |      |       |    |       |      |       |
|---|---|----|---|---|-------|------|-------|----|-------|------|-------|
| 1 | 1 | 20 | 3 | 3 | 11.40 | 2.04 | 21.05 | 8  | 7.27  | 0.91 | 3.43  |
| 1 | 1 | 20 | 3 | 4 | 12.20 | 1.96 | 21.95 | 10 | 7.97  | 0.80 | 3.91  |
| 1 | 1 | 20 | 3 | 5 | 8.50  | 1.89 | 12.99 | 10 | 7.06  | 0.71 | 2.41  |
| 1 | 1 | 20 | 3 | 6 | 9.50  | 2.01 | 16.31 | 5  | 4.68  | 0.94 | 2.91  |
| 1 | 1 | 20 | 3 | 7 | 11.00 | 2.16 | 16.41 | 8  | 6.41  | 0.80 | 4.48  |
| 1 | 1 | 20 | 3 | 8 | 6.80  | 1.93 | 8.90  | 5  | 3.55  | 0.71 | 3.00  |
| 1 | 1 | 19 | 1 | 1 | 18.50 | 1.86 | 16.96 | 10 | 4.86  | 0.49 | 8.09  |
| 1 | 1 | 19 | 1 | 2 | 22.20 | 2.27 | 41.00 | 12 | 9.11  | 0.76 | 11.80 |
| 1 | 1 | 19 | 1 | 3 | 16.70 | 1.95 | 21.00 | 5  | 3.35  | 0.67 | 6.40  |
| 1 | 1 | 19 | 1 | 4 | 13.60 | 1.79 | 16.10 | 12 | 6.19  | 0.52 | 8.68  |
| 1 | 1 | 19 | 1 | 5 | 20.70 | 2.26 | 40.00 | 11 | 8.96  | 0.81 | 11.82 |
| 1 | 1 | 19 | 1 | 6 | 20.00 | 2.25 | 32.94 | 12 | 9.93  | 0.83 | 11.32 |
| 1 | 1 | 19 | 1 | 7 | 13.40 | 2.14 | 18.10 | 6  | 3.35  | 0.56 | 6.05  |
| 1 | 1 | 19 | 1 | 8 | 10.10 | 1.90 | 7.47  | 4  | 2.02  | 0.51 | 2.40  |
| 1 | 1 | 19 | 2 | 1 | 16.00 | 2.01 | 23.47 | 8  | 6.54  | 0.82 | 7.05  |
| 1 | 1 | 19 | 2 | 2 | 12.90 | 2.78 | 22.02 | 6  | 5.61  | 0.94 | 7.02  |
| 1 | 1 | 19 | 2 | 3 | 11.70 | 2.11 | 15.19 | 6  | 4.79  | 0.80 | 6.20  |
| 1 | 1 | 19 | 2 | 4 | 13.50 | 1.95 | 15.83 | 5  | 4.03  | 0.81 | 5.62  |
| 1 | 1 | 19 | 2 | 5 | 14.70 | 2.11 | 18.83 | 6  | 5.10  | 0.85 | 5.86  |
| 1 | 1 | 19 | 2 | 6 | 16.60 | 2.08 | 23.65 | 8  | 6.28  | 0.79 | 8.90  |
| 1 | 1 | 19 | 2 | 7 | 16.10 | 2.21 | 26.68 | 9  | 7.92  | 0.88 | 7.45  |
| 1 | 1 | 19 | 2 | 8 | 10.00 | 1.96 | 15.42 | 5  | 4.53  | 0.91 | 4.15  |
| 1 | 1 | 19 | 3 | 1 | 9.40  | 1.97 | 10.83 | 11 | 10.21 | 0.93 | 0.10  |
| 1 | 1 | 19 | 3 | 2 | 15.40 | 1.66 | 26.20 | 4  | 2.80  | 0.70 | 0.10  |
| 1 | 1 | 19 | 3 | 3 | 16.00 | 1.96 | 22.85 | 6  | 5.07  | 0.85 | 0.10  |
| 1 | 1 | 19 | 3 | 4 | 17.30 | 1.91 | 26.30 | 10 | 7.15  | 0.72 | 8.67  |
| 1 | 1 | 19 | 3 | 5 | 17.60 | 1.95 | 25.50 | 11 | 7.53  | 0.68 | 4.36  |
| 1 | 1 | 19 | 3 | 6 | 17.10 | 1.56 | 18.88 | 10 | 6.61  | 0.66 | 5.43  |
| 1 | 1 | 19 | 3 | 7 | 11.60 | 1.47 | 10.40 | 6  | 3.72  | 0.62 | 2.90  |
| 1 | 1 | 19 | 3 | 8 | 10.40 | 1.32 | 8.91  | 5  | 2.88  | 0.58 | 2.71  |
| 1 | 1 | 14 | 1 | 1 | 12.70 | 2.19 | 10.42 | 3  | 1.29  | 0.43 | 1.83  |
| 1 | 1 | 14 | 1 | 2 | 9.00  | 1.55 | 5.04  | 2  | 0.86  | 0.43 | 2.81  |
| 1 | 1 | 14 | 1 | 3 | 13.40 | 1.73 | 7.62  | 8  | 1.06  | 0.13 | 4.53  |
| 1 | 1 | 14 | 1 | 4 | 11.20 | 1.55 | 5.32  | 6  | 1.07  | 0.18 | 2.09  |
| 1 | 1 | 14 | 1 | 5 | 13.10 | 1.71 | 9.87  | 8  | 4.09  | 0.51 | 3.11  |
| 1 | 1 | 14 | 1 | 6 | 7.50  | 1.31 | 3.16  | 1  | 1.01  | 1.01 | 1.89  |

|   |   |    |   |   |       |      |       |    |       |      |       |
|---|---|----|---|---|-------|------|-------|----|-------|------|-------|
| 1 | 1 | 14 | 1 | 7 | 9.70  | 1.44 | 4.75  | 2  | 1.07  | 0.54 | 2.53  |
| 1 | 1 | 14 | 1 | 8 | 7.30  | 1.65 | 4.02  | 1  | 0.28  | 0.28 | 2.52  |
| 1 | 1 | 14 | 2 | 1 | 13.70 | 1.96 | 6.28  | 2  | 0.86  | 0.43 | 7.35  |
| 1 | 1 | 14 | 2 | 2 | 14.80 | 1.82 | 12.52 | 1  | 0.76  | 0.76 | 3.83  |
| 1 | 1 | 14 | 2 | 3 | 7.90  | 1.84 | 5.94  | 2  | 0.83  | 0.42 | 3.07  |
| 1 | 1 | 14 | 2 | 4 | 10.70 | 1.62 | 6.24  | 2  | 0.70  | 0.35 | 4.49  |
| 1 | 1 | 14 | 2 | 5 | 12.60 | 1.73 | 8.75  | 2  | 0.95  | 0.48 | 2.60  |
| 1 | 1 | 14 | 2 | 6 | 13.00 | 1.64 | 7.36  | 8  | 2.66  | 0.33 | 3.91  |
| 1 | 1 | 14 | 2 | 7 | 10.10 | 1.74 | 6.08  | 6  | 3.02  | 0.50 | 1.51  |
| 1 | 1 | 14 | 2 | 8 | 11.10 | 1.64 | 6.14  | 2  | 0.80  | 0.40 | 4.42  |
| 1 | 1 | 14 | 3 | 1 | 10.40 | 1.51 | 4.08  | 2  | 0.81  | 0.41 | 2.98  |
| 1 | 1 | 14 | 3 | 2 | 12.30 | 1.82 | 7.28  | 8  | 2.35  | 0.29 | 2.29  |
| 1 | 1 | 14 | 3 | 3 | 12.30 | 1.36 | 3.65  | 8  | 1.98  | 0.25 | 0.64  |
| 1 | 1 | 14 | 3 | 4 | 9.50  | 1.21 | 3.34  | 6  | 1.61  | 0.27 | 0.11  |
| 1 | 1 | 14 | 3 | 5 | 9.80  | 1.70 | 4.34  | 1  | 0.38  | 0.38 | 1.99  |
| 1 | 1 | 14 | 3 | 6 | 13.60 | 1.85 | 11.82 | 3  | 1.65  | 0.55 | 5.91  |
| 1 | 1 | 14 | 3 | 7 | 10.90 | 1.76 | 4.95  | 1  | 0.29  | 0.29 | 2.61  |
| 1 | 1 | 14 | 3 | 8 | 9.10  | 1.71 | 4.75  | 1  | 0.50  | 0.50 | 3.14  |
| 1 | 1 | 22 | 1 | 1 | 13.20 | 2.01 | 17.38 | 11 | 4.48  | 0.41 | 8.61  |
| 1 | 1 | 22 | 1 | 2 | 12.50 | 2.06 | 12.99 | 8  | 3.80  | 0.48 | 6.27  |
| 1 | 1 | 22 | 1 | 3 | 14.00 | 2.22 | 20.69 | 9  | 5.25  | 0.58 | 10.81 |
| 1 | 1 | 22 | 1 | 4 | 11.60 | 1.97 | 9.60  | 7  | 2.16  | 0.31 | 4.30  |
| 1 | 1 | 22 | 1 | 5 | 14.10 | 2.14 | 27.04 | 11 | 8.76  | 0.80 | 10.61 |
| 1 | 1 | 22 | 1 | 6 | 14.90 | 2.24 | 21.06 | 8  | 7.01  | 0.88 | 10.20 |
| 1 | 1 | 22 | 1 | 7 | 14.70 | 2.81 | 29.09 | 12 | 10.87 | 0.91 | 11.99 |
| 1 | 1 | 22 | 1 | 8 | 13.10 | 2.24 | 25.25 | 10 | 8.41  | 0.84 | 10.88 |
| 1 | 1 | 22 | 2 | 1 | 12.90 | 1.99 | 16.64 | 5  | 2.73  | 0.55 | 6.87  |
| 1 | 1 | 22 | 2 | 2 | 9.90  | 2.22 | 14.83 | 6  | 5.10  | 0.85 | 4.27  |
| 1 | 1 | 22 | 2 | 3 | 10.80 | 1.79 | 11.84 | 3  | 2.61  | 0.87 | 4.05  |
| 1 | 1 | 22 | 2 | 4 | 13.30 | 2.15 | 17.39 | 8  | 4.68  | 0.59 | 3.96  |
| 1 | 1 | 22 | 2 | 5 | 12.80 | 2.12 | 15.22 | 8  | 4.67  | 0.58 | 3.29  |
| 1 | 1 | 22 | 2 | 6 | 10.10 | 2.09 | 16.22 | 9  | 7.29  | 0.81 | 2.73  |
| 1 | 1 | 22 | 2 | 7 | 12.60 | 1.99 | 24.83 | 7  | 6.21  | 0.89 | 7.19  |
| 1 | 1 | 22 | 2 | 8 | 10.80 | 1.96 | 10.87 | 3  | 1.88  | 0.63 | 4.45  |
| 1 | 1 | 22 | 3 | 1 | 12.60 | 2.04 | 20.00 | 7  | 4.14  | 0.59 | 5.60  |
| 1 | 1 | 22 | 3 | 2 | 12.30 | 1.99 | 21.42 | 7  | 5.70  | 0.81 | 4.46  |

|   |   |    |   |   |       |      |       |    |       |      |       |
|---|---|----|---|---|-------|------|-------|----|-------|------|-------|
| 1 | 1 | 22 | 3 | 3 | 13.20 | 2.01 | 13.16 | 6  | 3.33  | 0.56 | 3.18  |
| 1 | 1 | 22 | 3 | 4 | 13.60 | 2.00 | 14.75 | 6  | 3.40  | 0.57 | 4.97  |
| 1 | 1 | 22 | 3 | 5 | 10.10 | 2.04 | 14.73 | 9  | 7.42  | 0.82 | 5.04  |
| 1 | 1 | 22 | 3 | 6 | 12.60 | 2.15 | 25.62 | 11 | 9.02  | 0.82 | 5.59  |
| 1 | 1 | 22 | 3 | 7 | 12.70 | 1.75 | 21.03 | 7  | 4.80  | 0.69 | 2.25  |
| 1 | 1 | 22 | 3 | 8 | 9.10  | 2.09 | 11.57 | 6  | 3.55  | 0.59 | 3.25  |
| 1 | 1 | 23 | 1 | 1 | 13.10 | 1.99 | 18.67 | 6  | 6.75  | 1.13 | 5.67  |
| 1 | 1 | 23 | 1 | 2 | 18.60 | 2.17 | 38.43 | 12 | 14.65 | 1.22 | 10.76 |
| 1 | 1 | 23 | 1 | 3 | 8.50  | 1.80 | 7.97  | 1  | 1.40  | 1.40 | 2.37  |
| 1 | 1 | 23 | 1 | 4 | 14.70 | 2.29 | 23.19 | 4  | 5.25  | 1.31 | 6.66  |
| 1 | 1 | 23 | 1 | 5 | 8.10  | 1.74 | 7.09  | 2  | 2.19  | 1.10 | 0.28  |
| 1 | 1 | 23 | 1 | 6 | 5.90  | 1.98 | 3.77  | 2  | 1.11  | 0.56 | 0.98  |
| 1 | 1 | 23 | 1 | 7 | 5.90  | 1.62 | 4.29  | 2  | 1.25  | 0.63 | 2.25  |
| 1 | 1 | 23 | 1 | 8 | 6.00  | 1.80 | 3.37  | 2  | 0.94  | 0.47 | 0.98  |
| 1 | 1 | 23 | 2 | 1 | 12.60 | 2.23 | 19.19 | 5  | 4.85  | 0.97 | 1.69  |
| 1 | 1 | 23 | 2 | 2 | 7.70  | 1.75 | 6.01  | 2  | 1.23  | 0.62 | 1.65  |
| 1 | 1 | 23 | 2 | 3 | 9.30  | 1.93 | 3.72  | 3  | 1.32  | 0.44 | 1.97  |
| 1 | 1 | 23 | 2 | 4 | 11.30 | 2.09 | 13.21 | 1  | 1.39  | 1.39 | 5.10  |
| 1 | 1 | 23 | 2 | 5 | 10.80 | 1.96 | 9.05  | 2  | 3.21  | 1.61 | 3.12  |
| 1 | 1 | 23 | 2 | 6 | 7.30  | 1.93 | 4.63  | 3  | 1.05  | 0.35 | 1.20  |
| 1 | 1 | 23 | 2 | 7 | 5.60  | 1.69 | 4.22  | 2  | 0.95  | 0.48 | 1.27  |
| 1 | 1 | 23 | 2 | 8 | 6.90  | 1.71 | 10.32 | 3  | 1.71  | 0.57 | 1.23  |
| 1 | 1 | 23 | 3 | 1 | 7.10  | 1.80 | 5.63  | 2  | 2.10  | 1.05 | 2.46  |
| 1 | 1 | 23 | 3 | 2 | 8.30  | 1.93 | 7.00  | 2  | 3.15  | 1.58 | 0.83  |
| 1 | 1 | 23 | 3 | 3 | 15.50 | 2.25 | 28.20 | 5  | 3.33  | 0.67 | 4.98  |
| 1 | 1 | 23 | 3 | 4 | 8.90  | 1.94 | 9.71  | 3  | 2.46  | 0.82 | 3.45  |
| 1 | 1 | 23 | 3 | 5 | 8.30  | 1.70 | 6.57  | 2  | 2.25  | 1.13 | 1.44  |
| 1 | 1 | 23 | 3 | 6 | 7.10  | 1.43 | 6.17  | 2  | 1.94  | 0.97 | 2.75  |
| 1 | 1 | 23 | 3 | 7 | 6.20  | 1.74 | 4.58  | 2  | 1.92  | 0.96 | 2.05  |
| 1 | 1 | 23 | 3 | 8 | 4.40  | 1.64 | 3.53  | 1  | 0.99  | 0.99 | 0.85  |
| 1 | 1 | 2  | 1 | 1 | 12.20 | 1.94 | 11.80 | 3  | 1.60  | 0.53 | 2.23  |
| 1 | 1 | 2  | 1 | 2 | 8.50  | 1.95 | 6.73  | 1  | 1.19  | 1.19 | 2.35  |
| 1 | 1 | 2  | 1 | 3 | 16.00 | 2.06 | 27.02 | 9  | 10.48 | 1.16 | 6.84  |
| 1 | 1 | 2  | 1 | 4 | 8.90  | 1.41 | 3.95  | 2  | 2.43  | 1.22 | 1.84  |
| 1 | 1 | 2  | 1 | 5 | 9.70  | 1.91 | 10.14 | 1  | 1.04  | 1.04 | 1.87  |
| 1 | 1 | 2  | 1 | 6 | 8.30  | 1.76 | 5.42  | 1  | 2.11  | 2.11 | 2.00  |

|   |   |    |   |   |       |      |       |   |      |      |      |
|---|---|----|---|---|-------|------|-------|---|------|------|------|
| 1 | 1 | 2  | 1 | 7 | 9.00  | 1.76 | 3.93  | 2 | 1.60 | 0.80 | 1.05 |
| 1 | 1 | 2  | 1 | 8 | 7.40  | 1.59 | 3.42  | 1 | 1.11 | 1.11 | 0.97 |
| 1 | 1 | 2  | 2 | 1 | 12.10 | 1.98 | 11.52 | 2 | 1.81 | 0.91 | 4.71 |
| 1 | 1 | 2  | 2 | 2 | 10.00 | 1.90 | 9.61  | 4 | 4.93 | 1.23 | 3.61 |
| 1 | 1 | 2  | 2 | 3 | 10.40 | 2.06 | 11.29 | 2 | 2.60 | 1.30 | 4.22 |
| 1 | 1 | 2  | 2 | 4 | 9.00  | 1.73 | 7.21  | 2 | 1.06 | 0.53 | 3.22 |
| 1 | 1 | 2  | 2 | 5 | 13.00 | 1.70 | 10.42 | 4 | 4.73 | 1.18 | 2.19 |
| 1 | 1 | 2  | 2 | 6 | 8.70  | 1.55 | 6.22  | 2 | 2.49 | 1.25 | 1.16 |
| 1 | 1 | 2  | 2 | 7 | 7.90  | 1.93 | 9.91  | 1 | 0.86 | 0.86 | 2.94 |
| 1 | 1 | 2  | 2 | 8 | 8.40  | 1.70 | 5.43  | 1 | 0.91 | 0.91 | 1.61 |
| 1 | 1 | 2  | 3 | 1 | 7.80  | 1.74 | 4.50  | 3 | 2.36 | 0.79 | 1.28 |
| 1 | 1 | 2  | 3 | 2 | 7.00  | 1.65 | 4.43  | 1 | 0.96 | 0.96 | 2.36 |
| 1 | 1 | 2  | 3 | 3 | 9.30  | 1.66 | 9.00  | 2 | 2.25 | 1.13 | 1.60 |
| 1 | 1 | 2  | 3 | 4 | 9.70  | 1.66 | 4.51  | 1 | 0.24 | 0.24 | 0.84 |
| 1 | 1 | 2  | 3 | 5 | 7.50  | 1.93 | 6.95  | 3 | 2.05 | 0.68 | 0.66 |
| 1 | 1 | 2  | 3 | 6 | 7.70  | 2.05 | 6.25  | 3 | 2.14 | 0.71 | 0.47 |
| 1 | 1 | 2  | 3 | 7 | 9.60  | 2.00 | 4.56  | 1 | 0.70 | 0.07 | 0.88 |
| 1 | 1 | 2  | 3 | 8 | 6.90  | 1.82 | 4.37  | 2 | 1.58 | 0.79 | 1.26 |
| 1 | 1 | 10 | 1 | 1 | 7.10  | 2.40 | 11.69 | 4 | 2.68 | 0.67 | 4.75 |
| 1 | 1 | 10 | 1 | 2 | 9.80  | 2.33 | 13.63 | 6 | 3.04 | 0.51 | 4.30 |
| 1 | 1 | 10 | 1 | 3 | 12.00 | 2.31 | 15.17 | 6 | 2.77 | 0.46 | 3.00 |
| 1 | 1 | 10 | 1 | 4 | 7.70  | 2.32 | 10.17 | 2 | 1.06 | 0.53 | 1.97 |
| 1 | 1 | 10 | 1 | 5 | 8.00  | 2.16 | 9.87  | 1 | 0.28 | 0.28 | 3.87 |
| 1 | 1 | 10 | 1 | 6 | 7.20  | 2.11 | 9.53  | 4 | 2.15 | 0.54 | 1.16 |
| 1 | 1 | 10 | 1 | 7 | 9.00  | 1.96 | 10.66 | 4 | 2.02 | 0.51 | 4.20 |
| 1 | 1 | 10 | 1 | 8 | 11.20 | 2.21 | 17.01 | 6 | 3.35 | 0.56 | 4.11 |
| 1 | 1 | 10 | 2 | 1 | 15.40 | 2.07 | 27.23 | 8 | 8.87 | 1.11 | 4.20 |
| 1 | 1 | 10 | 2 | 2 | 13.80 | 2.29 | 18.75 | 5 | 4.62 | 0.92 | 5.64 |
| 1 | 1 | 10 | 2 | 3 | 11.00 | 2.26 | 22.87 | 7 | 7.15 | 1.02 | 4.41 |
| 1 | 1 | 10 | 2 | 4 | 14.40 | 2.52 | 20.75 | 5 | 4.20 | 0.84 | 6.06 |
| 1 | 1 | 10 | 2 | 5 | 15.60 | 2.35 | 27.69 | 2 | 2.31 | 1.16 | 7.03 |
| 1 | 1 | 10 | 2 | 6 | 8.20  | 2.19 | 9.07  | 4 | 3.42 | 0.86 | 1.00 |
| 1 | 1 | 10 | 2 | 7 | 11.20 | 2.04 | 12.31 | 2 | 2.03 | 1.02 | 0.84 |
| 1 | 1 | 10 | 2 | 8 | 8.90  | 1.24 | 6.84  | 3 | 0.76 | 0.25 | 1.24 |
| 1 | 1 | 10 | 3 | 1 | 13.00 | 2.36 | 21.98 | 8 | 6.67 | 0.83 | 7.05 |
| 1 | 1 | 10 | 3 | 2 | 8.40  | 2.29 | 13.37 | 3 | 2.40 | 0.80 | 3.89 |

|   |   |    |   |   |       |      |       |    |       |      |       |
|---|---|----|---|---|-------|------|-------|----|-------|------|-------|
| 1 | 1 | 10 | 3 | 3 | 9.50  | 2.95 | 17.23 | 6  | 3.93  | 0.66 | 7.45  |
| 1 | 1 | 10 | 3 | 4 | 9.20  | 2.29 | 10.13 | 4  | 2.36  | 0.59 | 3.99  |
| 1 | 1 | 10 | 3 | 5 | 10.20 | 2.21 | 14.01 | 6  | 3.62  | 0.60 | 4.92  |
| 1 | 1 | 10 | 3 | 6 | 8.40  | 2.11 | 9.03  | 3  | 2.15  | 0.72 | 3.53  |
| 1 | 1 | 10 | 3 | 7 | 5.30  | 2.00 | 4.21  | 2  | 2.90  | 1.45 | 3.67  |
| 1 | 1 | 10 | 3 | 8 | 5.90  | 1.56 | 7.75  | 4  | 3.16  | 0.79 | 2.63  |
| 1 | 1 | 24 | 1 | 1 | 26.90 | 2.70 | 56.84 | 13 | 13.87 | 1.07 | 22.04 |
| 1 | 1 | 24 | 1 | 2 | 21.00 | 2.20 | 38.33 | 9  | 12.48 | 1.39 | 11.96 |
| 1 | 1 | 24 | 1 | 3 | 14.90 | 2.59 | 27.55 | 10 | 11.80 | 1.18 | 17.51 |
| 1 | 1 | 24 | 1 | 4 | 14.00 | 2.21 | 22.99 | 4  | 5.02  | 1.26 | 9.56  |
| 1 | 1 | 24 | 1 | 5 | 11.60 | 2.29 | 20.38 | 4  | 4.52  | 1.13 | 9.38  |
| 1 | 1 | 24 | 1 | 6 | 9.80  | 2.43 | 16.94 | 3  | 3.20  | 1.07 | 6.76  |
| 1 | 1 | 24 | 1 | 7 | 7.60  | 2.07 | 12.98 | 3  | 2.19  | 0.73 | 7.79  |
| 1 | 1 | 24 | 1 | 8 | 12.10 | 2.26 | 14.75 | 4  | 4.29  | 1.07 | 8.72  |
| 1 | 1 | 24 | 2 | 1 | 16.90 | 2.51 | 33.42 | 9  | 10.86 | 1.21 | 13.72 |
| 1 | 1 | 24 | 2 | 2 | 20.00 | 2.67 | 35.60 | 6  | 7.80  | 1.30 | 12.27 |
| 1 | 1 | 24 | 2 | 3 | 20.40 | 2.36 | 40.55 | 8  | 9.59  | 1.20 | 14.88 |
| 1 | 1 | 24 | 2 | 4 | 24.00 | 2.56 | 41.79 | 10 | 12.12 | 1.21 | 15.62 |
| 1 | 1 | 24 | 2 | 5 | 18.30 | 2.57 | 33.52 | 8  | 10.01 | 1.25 | 12.60 |
| 1 | 1 | 24 | 2 | 6 | 17.40 | 2.29 | 29.85 | 8  | 8.84  | 1.11 | 10.64 |
| 1 | 1 | 24 | 2 | 7 | 13.80 | 2.26 | 18.33 | 4  | 5.18  | 1.30 | 7.75  |
| 1 | 1 | 24 | 2 | 8 | 7.90  | 1.90 | 13.44 | 3  | 3.56  | 1.19 | 4.78  |
| 1 | 1 | 24 | 3 | 1 | 12.70 | 2.51 | 28.40 | 4  | 6.21  | 1.55 | 12.11 |
| 1 | 1 | 24 | 3 | 2 | 13.40 | 2.06 | 25.17 | 4  | 3.39  | 0.85 | 11.22 |
| 1 | 1 | 24 | 3 | 3 | 14.00 | 2.09 | 20.13 | 4  | 5.08  | 1.27 | 11.78 |
| 1 | 1 | 24 | 3 | 4 | 12.30 | 2.89 | 23.75 | 5  | 6.67  | 1.33 | 8.35  |
| 1 | 1 | 24 | 3 | 5 | 11.40 | 2.85 | 19.54 | 6  | 7.37  | 1.23 | 10.78 |
| 1 | 1 | 24 | 3 | 6 | 15.10 | 1.90 | 19.50 | 2  | 1.98  | 0.99 | 7.27  |
| 1 | 1 | 24 | 3 | 7 | 12.90 | 2.25 | 18.88 | 4  | 4.98  | 1.25 | 4.52  |
| 1 | 1 | 24 | 3 | 8 | 12.80 | 2.43 | 24.71 | 4  | 5.22  | 1.31 | 10.80 |
| 1 | 1 | 3  | 1 | 1 | 10.50 | 1.85 | 7.30  | 6  | 3.19  | 0.53 | 3.86  |
| 1 | 1 | 3  | 1 | 2 | 11.80 | 1.74 | 6.70  | 5  | 1.53  | 0.31 | 1.40  |
| 1 | 1 | 3  | 1 | 3 | 12.00 | 2.40 | 5.14  | 1  | 0.20  | 0.20 | 1.45  |
| 1 | 1 | 3  | 1 | 4 | 13.50 | 1.82 | 7.60  | 4  | 1.37  | 0.34 | 1.66  |
| 1 | 1 | 3  | 1 | 5 | 9.30  | 1.95 | 5.00  | 3  | 1.06  | 0.35 | 0.70  |
| 1 | 1 | 3  | 1 | 6 | 7.60  | 1.60 | 4.86  | 3  | 1.70  | 0.57 | 0.42  |

|   |   |   |   |   |       |      |       |    |      |      |      |
|---|---|---|---|---|-------|------|-------|----|------|------|------|
| 1 | 1 | 3 | 1 | 7 | 7.30  | 1.85 | 4.40  | 2  | 0.95 | 0.48 | 1.05 |
| 1 | 1 | 3 | 1 | 8 | 6.00  | 1.85 | 2.56  | 1  | 0.42 | 0.42 | 0.62 |
| 1 | 1 | 3 | 2 | 1 | 6.60  | 1.80 | 8.64  | 5  | 2.20 | 0.44 | 3.09 |
| 1 | 1 | 3 | 2 | 2 | 8.40  | 1.83 | 6.60  | 3  | 1.49 | 0.50 | 2.22 |
| 1 | 1 | 3 | 2 | 3 | 9.40  | 1.69 | 7.83  | 5  | 2.40 | 0.48 | 1.86 |
| 1 | 1 | 3 | 2 | 4 | 8.80  | 1.61 | 5.36  | 4  | 1.66 | 0.42 | 1.33 |
| 1 | 1 | 3 | 2 | 5 | 10.00 | 1.64 | 8.44  | 3  | 0.98 | 0.33 | 1.95 |
| 1 | 1 | 3 | 2 | 6 | 7.60  | 2.25 | 5.70  | 2  | 1.70 | 0.85 | 4.62 |
| 1 | 1 | 3 | 2 | 7 | 6.90  | 1.68 | 6.25  | 4  | 1.97 | 0.49 | 1.90 |
| 1 | 1 | 3 | 2 | 8 | 8.00  | 2.09 | 6.00  | 4  | 1.31 | 0.33 | 1.97 |
| 1 | 1 | 3 | 3 | 1 | 8.50  | 1.54 | 5.22  | 1  | 0.70 | 0.07 | 2.88 |
| 1 | 1 | 3 | 3 | 2 | 10.00 | 1.44 | 12.45 | 6  | 4.30 | 0.72 | 2.51 |
| 1 | 1 | 3 | 3 | 3 | 8.80  | 1.73 | 6.25  | 2  | 1.25 | 0.63 | 2.60 |
| 1 | 1 | 3 | 3 | 4 | 9.50  | 1.53 | 10.33 | 6  | 4.26 | 0.71 | 2.97 |
| 1 | 1 | 3 | 3 | 5 | 11.20 | 2.28 | 7.99  | 5  | 1.68 | 0.34 | 3.50 |
| 1 | 1 | 3 | 3 | 6 | 7.90  | 2.04 | 5.53  | 4  | 1.55 | 0.39 | 1.82 |
| 1 | 1 | 3 | 3 | 7 | 6.50  | 1.69 | 6.06  | 3  | 1.80 | 0.60 | 0.80 |
| 1 | 1 | 3 | 3 | 8 | 6.50  | 1.61 | 5.55  | 4  | 2.32 | 0.58 | 1.07 |
| 1 | 1 | 8 | 1 | 1 | 10.00 | 1.80 | 8.95  | 4  | 1.62 | 0.41 | 4.08 |
| 1 | 1 | 8 | 1 | 2 | 8.80  | 2.20 | 8.28  | 4  | 1.35 | 0.34 | 4.38 |
| 1 | 1 | 8 | 1 | 3 | 10.50 | 1.80 | 8.26  | 3  | 1.13 | 0.38 | 4.41 |
| 1 | 1 | 8 | 1 | 4 | 14.30 | 2.15 | 15.20 | 8  | 3.78 | 0.47 | 7.21 |
| 1 | 1 | 8 | 1 | 5 | 9.40  | 1.84 | 7.87  | 3  | 1.03 | 0.34 | 3.38 |
| 1 | 1 | 8 | 1 | 6 | 6.40  | 1.80 | 6.33  | 3  | 1.18 | 0.39 | 3.17 |
| 1 | 1 | 8 | 1 | 7 | 6.90  | 1.54 | 5.17  | 2  | 1.09 | 0.55 | 1.72 |
| 1 | 1 | 8 | 1 | 8 | 8.50  | 1.89 | 5.99  | 2  | 0.82 | 0.41 | 3.03 |
| 1 | 1 | 8 | 2 | 1 | 11.70 | 2.03 | 18.68 | 6  | 4.28 | 0.71 | 3.44 |
| 1 | 1 | 8 | 2 | 2 | 11.80 | 1.98 | 16.49 | 8  | 5.76 | 0.72 | 5.25 |
| 1 | 1 | 8 | 2 | 3 | 9.50  | 1.81 | 10.02 | 3  | 2.07 | 0.69 | 3.21 |
| 1 | 1 | 8 | 2 | 4 | 10.30 | 1.96 | 11.04 | 3  | 2.08 | 0.69 | 2.72 |
| 1 | 1 | 8 | 2 | 5 | 10.00 | 1.70 | 9.90  | 3  | 1.86 | 0.62 | 2.87 |
| 1 | 1 | 8 | 2 | 6 | 7.90  | 2.06 | 6.77  | 4  | 2.60 | 0.65 | 1.72 |
| 1 | 1 | 8 | 2 | 7 | 6.03  | 2.24 | 4.82  | 3  | 1.74 | 0.58 | 1.52 |
| 1 | 1 | 8 | 2 | 8 | 7.50  | 1.67 | 4.53  | 1  | 1.63 | 1.63 | 0.90 |
| 1 | 1 | 8 | 3 | 1 | 14.10 | 2.05 | 20.65 | 10 | 6.51 | 0.65 | 4.08 |
| 1 | 1 | 8 | 3 | 2 | 13.80 | 2.18 | 17.10 | 5  | 3.15 | 0.63 | 4.99 |



|   |   |    |   |   |       |      |       |    |      |      |       |
|---|---|----|---|---|-------|------|-------|----|------|------|-------|
| 1 | 1 | 8  | 3 | 3 | 12.30 | 1.80 | 11.75 | 3  | 1.52 | 0.51 | 2.79  |
| 1 | 1 | 8  | 3 | 4 | 13.30 | 2.04 | 12.25 | 5  | 2.80 | 0.56 | 4.50  |
| 1 | 1 | 8  | 3 | 5 | 12.20 | 1.89 | 12.80 | 4  | 2.28 | 0.57 | 2.82  |
| 1 | 1 | 8  | 3 | 6 | 10.40 | 1.65 | 8.43  | 2  | 1.09 | 0.55 | 2.55  |
| 1 | 1 | 8  | 3 | 7 | 11.80 | 1.74 | 10.26 | 4  | 2.32 | 0.58 | 2.67  |
| 1 | 1 | 8  | 3 | 8 | 11.60 | 2.75 | 9.24  | 5  | 3.49 | 0.70 | 3.38  |
| 1 | 1 | 6  | 1 | 1 | 15.50 | 2.14 | 21.05 | 5  | 2.05 | 0.41 | 8.43  |
| 1 | 1 | 6  | 1 | 2 | 20.90 | 2.26 | 32.78 | 9  | 6.92 | 0.77 | 11.42 |
| 1 | 1 | 6  | 1 | 3 | 13.80 | 2.36 | 16.49 | 5  | 3.00 | 0.60 | 4.63  |
| 1 | 1 | 6  | 1 | 4 | 17.90 | 2.32 | 23.94 | 7  | 4.42 | 0.63 | 7.38  |
| 1 | 1 | 6  | 1 | 5 | 20.00 | 1.96 | 23.92 | 8  | 4.25 | 0.53 | 10.97 |
| 1 | 1 | 6  | 1 | 6 | 21.20 | 2.31 | 28.60 | 10 | 5.10 | 0.51 | 10.38 |
| 1 | 1 | 6  | 1 | 7 | 18.10 | 2.20 | 26.89 | 9  | 5.42 | 0.60 | 12.11 |
| 1 | 1 | 6  | 1 | 8 | 14.50 | 2.18 | 17.49 | 5  | 3.05 | 0.61 | 6.10  |
| 1 | 1 | 6  | 2 | 1 | 15.20 | 2.37 | 19.53 | 5  | 3.32 | 0.66 | 5.19  |
| 1 | 1 | 6  | 2 | 2 | 16.30 | 1.89 | 16.38 | 7  | 6.20 | 0.89 | 5.54  |
| 1 | 1 | 6  | 2 | 3 | 17.00 | 2.19 | 16.55 | 9  | 5.85 | 0.65 | 4.14  |
| 1 | 1 | 6  | 2 | 4 | 16.00 | 2.04 | 18.42 | 7  | 5.43 | 0.78 | 4.78  |
| 1 | 1 | 6  | 2 | 5 | 16.30 | 2.14 | 18.26 | 7  | 5.98 | 0.85 | 7.99  |
| 1 | 1 | 6  | 2 | 6 | 19.10 | 2.12 | 22.24 | 2  | 1.49 | 0.75 | 9.75  |
| 1 | 1 | 6  | 2 | 7 | 20.10 | 2.18 | 22.25 | 7  | 7.33 | 1.05 | 5.98  |
| 1 | 1 | 6  | 2 | 8 | 9.50  | 2.10 | 9.54  | 4  | 2.82 | 0.71 | 9.79  |
| 1 | 1 | 6  | 3 | 1 | 15.90 | 2.07 | 18.67 | 8  | 3.24 | 0.41 | 7.13  |
| 1 | 1 | 6  | 3 | 2 | 19.20 | 2.44 | 28.26 | 12 | 5.61 | 0.47 | 10.75 |
| 1 | 1 | 6  | 3 | 3 | 20.20 | 2.43 | 29.63 | 11 | 5.10 | 0.46 | 12.04 |
| 1 | 1 | 6  | 3 | 4 | 16.70 | 2.47 | 20.25 | 6  | 2.35 | 0.39 | 11.19 |
| 1 | 1 | 6  | 3 | 5 | 13.70 | 2.07 | 14.08 | 5  | 2.30 | 0.46 | 6.15  |
| 1 | 1 | 6  | 3 | 6 | 21.00 | 2.23 | 22.62 | 6  | 1.80 | 0.30 | 12.65 |
| 1 | 1 | 6  | 3 | 7 | 15.00 | 2.24 | 19.15 | 6  | 2.85 | 0.48 | 8.52  |
| 1 | 1 | 6  | 3 | 8 | 16.00 | 2.03 | 22.15 | 3  | 2.15 | 0.72 | 2.77  |
| 1 | 1 | 12 | 1 | 1 | 15.20 | 2.14 | 23.84 | 11 | 8.10 | 0.74 | 5.44  |
| 1 | 1 | 12 | 1 | 2 | 11.60 | 1.91 | 13.42 | 10 | 7.66 | 0.77 | 6.68  |
| 1 | 1 | 12 | 1 | 3 | 15.80 | 1.85 | 21.29 | 6  | 4.63 | 0.77 | 4.03  |
| 1 | 1 | 12 | 1 | 4 | 10.50 | 2.05 | 13.46 | 6  | 4.30 | 0.72 | 3.90  |
| 1 | 1 | 12 | 1 | 5 | 19.20 | 2.00 | 28.50 | 12 | 9.15 | 0.76 | 8.11  |
| 1 | 1 | 12 | 1 | 6 | 9.80  | 1.88 | 9.87  | 4  | 3.03 | 0.76 | 3.26  |

|   |   |    |   |   |       |      |       |    |      |      |       |
|---|---|----|---|---|-------|------|-------|----|------|------|-------|
| 1 | 1 | 12 | 1 | 7 | 18.50 | 2.08 | 24.31 | 12 | 8.22 | 0.69 | 7.02  |
| 1 | 1 | 12 | 1 | 8 | 14.50 | 1.63 | 18.90 | 9  | 6.70 | 0.74 | 5.44  |
| 1 | 1 | 12 | 2 | 1 | 16.00 | 1.94 | 21.32 | 8  | 6.50 | 0.81 | 8.43  |
| 1 | 1 | 12 | 2 | 2 | 15.00 | 1.84 | 17.02 | 8  | 5.55 | 0.69 | 5.40  |
| 1 | 1 | 12 | 2 | 3 | 14.00 | 1.98 | 19.18 | 10 | 7.38 | 0.74 | 5.79  |
| 1 | 1 | 12 | 2 | 4 | 14.90 | 1.98 | 22.50 | 4  | 3.36 | 0.84 | 3.88  |
| 1 | 1 | 12 | 2 | 5 | 10.50 | 1.95 | 11.65 | 9  | 7.30 | 0.81 | 5.25  |
| 1 | 1 | 12 | 2 | 6 | 10.90 | 1.90 | 14.25 | 6  | 4.52 | 0.75 | 4.40  |
| 1 | 1 | 12 | 2 | 7 | 12.00 | 1.85 | 14.06 | 5  | 4.00 | 0.80 | 5.06  |
| 1 | 1 | 12 | 2 | 8 | 15.00 | 1.89 | 17.96 | 5  | 3.94 | 0.79 | 7.22  |
| 1 | 1 | 12 | 3 | 1 | 9.80  | 1.75 | 10.06 | 3  | 2.17 | 0.72 | 1.28  |
| 1 | 1 | 12 | 3 | 2 | 10.00 | 1.75 | 10.01 | 5  | 3.28 | 0.66 | 3.03  |
| 1 | 1 | 12 | 3 | 3 | 13.80 | 1.33 | 14.40 | 6  | 4.03 | 0.67 | 4.73  |
| 1 | 1 | 12 | 3 | 4 | 10.60 | 1.50 | 8.40  | 3  | 1.81 | 0.60 | 3.09  |
| 1 | 1 | 12 | 3 | 5 | 10.30 | 1.83 | 7.19  | 5  | 1.99 | 0.40 | 2.02  |
| 1 | 1 | 12 | 3 | 6 | 15.70 | 1.75 | 13.92 | 6  | 3.56 | 0.59 | 3.61  |
| 1 | 1 | 12 | 3 | 7 | 12.50 | 1.90 | 14.17 | 7  | 5.01 | 0.72 | 3.54  |
| 1 | 1 | 12 | 3 | 8 | 9.30  | 1.64 | 8.74  | 5  | 3.17 | 0.63 | 2.31  |
| 1 | 1 | 25 | 1 | 1 | 28.50 | 1.79 | 28.12 | 6  | 4.50 | 0.75 | 6.98  |
| 1 | 1 | 25 | 1 | 2 | 23.10 | 1.87 | 27.34 | 5  | 4.60 | 0.92 | 6.40  |
| 1 | 1 | 25 | 1 | 3 | 29.80 | 1.99 | 35.20 | 4  | 2.96 | 0.74 | 4.13  |
| 1 | 1 | 25 | 1 | 4 | 15.70 | 1.78 | 17.38 | 8  | 7.10 | 0.89 | 10.68 |
| 1 | 1 | 25 | 1 | 5 | 10.80 | 2.00 | 11.27 | 3  | 2.20 | 0.73 | 4.80  |
| 1 | 1 | 25 | 1 | 6 | 15.90 | 1.73 | 15.61 | 4  | 3.64 | 0.91 | 6.30  |
| 1 | 1 | 25 | 1 | 7 | 8.80  | 2.01 | 7.53  | 4  | 2.81 | 0.70 | 5.15  |
| 1 | 1 | 25 | 1 | 8 | 8.40  | 1.45 | 7.87  | 2  | 1.66 | 0.83 | 3.99  |
| 1 | 1 | 25 | 2 | 1 | 14.60 | 1.80 | 17.86 | 12 | 7.31 | 0.61 | 10.86 |
| 1 | 1 | 25 | 2 | 2 | 15.40 | 2.10 | 16.86 | 8  | 6.96 | 0.87 | 10.52 |
| 1 | 1 | 25 | 2 | 3 | 11.60 | 1.61 | 11.50 | 11 | 9.03 | 0.82 | 13.04 |
| 1 | 1 | 25 | 2 | 4 | 20.20 | 1.95 | 26.82 | 5  | 4.04 | 0.81 | 7.36  |
| 1 | 1 | 25 | 2 | 5 | 10.70 | 1.89 | 9.25  | 2  | 1.75 | 0.88 | 5.30  |
| 1 | 1 | 25 | 2 | 6 | 13.40 | 1.97 | 16.83 | 4  | 2.80 | 0.70 | 7.59  |
| 1 | 1 | 25 | 2 | 7 | 11.00 | 1.49 | 10.91 | 2  | 1.40 | 0.70 | 3.46  |
| 1 | 1 | 25 | 2 | 8 | 9.00  | 1.67 | 8.35  | 4  | 2.00 | 0.50 | 3.17  |
| 1 | 1 | 25 | 3 | 1 | 19.90 | 1.27 | 21.06 | 8  | 6.37 | 0.80 | 6.67  |
| 1 | 1 | 25 | 3 | 2 | 14.40 | 2.02 | 12.73 | 5  | 3.48 | 0.70 | 5.30  |

|   |   |    |   |   |       |      |       |    |       |      |      |
|---|---|----|---|---|-------|------|-------|----|-------|------|------|
| 1 | 1 | 25 | 3 | 3 | 11.20 | 1.89 | 7.92  | 2  | 0.99  | 0.50 | 4.08 |
| 1 | 1 | 25 | 3 | 4 | 12.50 | 1.66 | 13.33 | 6  | 3.68  | 0.61 | 5.00 |
| 1 | 1 | 25 | 3 | 5 | 14.60 | 1.66 | 13.77 | 3  | 1.85  | 0.62 | 7.04 |
| 1 | 1 | 25 | 3 | 6 | 12.50 | 1.84 | 14.72 | 5  | 4.40  | 0.88 | 5.64 |
| 1 | 1 | 25 | 3 | 7 | 12.30 | 1.59 | 9.09  | 2  | 1.11  | 0.56 | 4.68 |
| 1 | 1 | 25 | 3 | 8 | 7.80  | 1.62 | 7.30  | 1  | 0.84  | 0.84 | 3.66 |
| 1 | 1 | 21 | 1 | 1 | 13.10 | 1.81 | 9.76  | 5  | 3.44  | 0.69 | 2.93 |
| 1 | 1 | 21 | 1 | 2 | 16.08 | 1.66 | 10.51 | 8  | 4.33  | 0.54 | 3.02 |
| 1 | 1 | 21 | 1 | 3 | 10.20 | 1.76 | 7.41  | 9  | 2.85  | 0.32 | 3.97 |
| 1 | 1 | 21 | 1 | 4 | 14.06 | 1.96 | 19.34 | 5  | 4.06  | 0.81 | 2.81 |
| 1 | 1 | 21 | 1 | 5 | 11.10 | 1.76 | 10.11 | 6  | 4.06  | 0.68 | 4.09 |
| 1 | 1 | 21 | 1 | 6 | 12.80 | 1.94 | 9.56  | 5  | 4.03  | 0.81 | 3.62 |
| 1 | 1 | 21 | 1 | 7 | 10.90 | 1.75 | 6.52  | 4  | 2.99  | 0.75 | 2.09 |
| 1 | 1 | 21 | 1 | 8 | 13.60 | 2.02 | 20.91 | 8  | 8.35  | 1.04 | 7.01 |
| 1 | 1 | 21 | 2 | 1 | 11.60 | 1.44 | 5.42  | 3  | 1.37  | 0.46 | 3.07 |
| 1 | 1 | 21 | 2 | 2 | 11.50 | 1.79 | 6.54  | 3  | 2.15  | 0.72 | 3.08 |
| 1 | 1 | 21 | 2 | 3 | 16.20 | 2.13 | 14.00 | 9  | 4.38  | 0.49 | 6.21 |
| 1 | 1 | 21 | 2 | 4 | 17.90 | 2.23 | 42.80 | 12 | 17.05 | 1.42 | 7.29 |
| 1 | 1 | 21 | 2 | 5 | 12.10 | 1.56 | 4.77  | 3  | 2.50  | 0.83 | 1.67 |
| 1 | 1 | 21 | 2 | 6 | 12.40 | 2.18 | 7.69  | 4  | 2.05  | 0.51 | 3.08 |
| 1 | 1 | 21 | 2 | 7 | 9.00  | 2.10 | 7.36  | 4  | 3.28  | 0.82 | 2.12 |
| 1 | 1 | 21 | 2 | 8 | 11.60 | 1.74 | 7.11  | 4  | 1.21  | 0.30 | 4.23 |
| 1 | 1 | 21 | 3 | 1 | 12.40 | 1.87 | 6.25  | 5  | 2.34  | 0.47 | 2.45 |
| 1 | 1 | 21 | 3 | 2 | 14.50 | 1.66 | 13.68 | 6  | 4.56  | 0.76 | 3.21 |
| 1 | 1 | 21 | 3 | 3 | 13.20 | 1.76 | 13.72 | 8  | 6.54  | 0.82 | 2.33 |
| 1 | 1 | 21 | 3 | 4 | 15.10 | 1.83 | 10.23 | 4  | 2.43  | 0.61 | 3.38 |
| 1 | 1 | 21 | 3 | 5 | 14.70 | 1.50 | 8.07  | 6  | 3.48  | 0.58 | 3.63 |
| 1 | 1 | 21 | 3 | 6 | 14.10 | 1.55 | 9.77  | 2  | 1.42  | 0.71 | 5.42 |
| 1 | 1 | 21 | 3 | 7 | 11.50 | 2.26 | 6.31  | 1  | 0.62  | 0.62 | 3.90 |
| 1 | 1 | 21 | 3 | 8 | 13.00 | 1.60 | 5.94  | 3  | 1.49  | 0.50 | 3.56 |
| 2 | 1 | 16 | 1 | 1 | 13.60 | 2.30 | 17.56 | 3  | 1.52  | 0.51 | 6.23 |
| 2 | 1 | 16 | 1 | 2 | 11.80 | 2.40 | 13.40 | 4  | 2.78  | 0.70 | 3.89 |
| 2 | 1 | 16 | 1 | 3 | 12.60 | 1.82 | 14.54 | 5  | 2.62  | 0.52 | 4.95 |
| 2 | 1 | 16 | 1 | 4 | 9.80  | 2.25 | 14.82 | 4  | 3.16  | 0.79 | 6.35 |
| 2 | 1 | 16 | 1 | 5 | 9.50  | 2.04 | 11.76 | 3  | 2.33  | 0.78 | 4.82 |
| 2 | 1 | 16 | 1 | 6 | 13.00 | 2.50 | 19.12 | 5  | 4.49  | 0.90 | 8.10 |

|   |   |    |   |   |       |      |       |    |      |      |       |
|---|---|----|---|---|-------|------|-------|----|------|------|-------|
| 2 | 1 | 16 | 1 | 7 | 13.20 | 2.35 | 26.86 | 9  | 6.11 | 0.68 | 10.80 |
| 2 | 1 | 16 | 1 | 8 | 16.50 | 2.35 | 27.32 | 8  | 5.74 | 0.72 | 11.07 |
| 2 | 1 | 16 | 2 | 1 | 16.00 | 2.50 | 26.92 | 5  | 3.29 | 0.66 | 2.32  |
| 2 | 1 | 16 | 2 | 2 | 13.00 | 2.25 | 20.18 | 5  | 4.09 | 0.82 | 8.19  |
| 2 | 1 | 16 | 2 | 3 | 9.70  | 2.29 | 13.78 | 7  | 4.50 | 0.64 | 6.48  |
| 2 | 1 | 16 | 2 | 4 | 8.90  | 1.84 | 8.68  | 5  | 4.30 | 0.86 | 4.81  |
| 2 | 1 | 16 | 2 | 5 | 13.50 | 2.16 | 20.20 | 9  | 6.05 | 0.67 | 8.86  |
| 2 | 1 | 16 | 2 | 6 | 12.50 | 2.40 | 17.95 | 6  | 3.45 | 0.58 | 5.82  |
| 2 | 1 | 16 | 2 | 7 | 10.40 | 2.40 | 17.07 | 8  | 6.45 | 0.81 | 6.44  |
| 2 | 1 | 16 | 2 | 8 | 10.20 | 2.35 | 12.50 | 3  | 2.82 | 0.94 | 6.45  |
| 2 | 1 | 16 | 3 | 1 | 15.30 | 2.50 | 27.12 | 8  | 6.52 | 0.82 | 12.06 |
| 2 | 1 | 16 | 3 | 2 | 11.20 | 2.10 | 13.04 | 5  | 3.64 | 0.73 | 3.83  |
| 2 | 1 | 16 | 3 | 3 | 13.50 | 2.30 | 14.63 | 10 | 4.06 | 0.41 | 2.78  |
| 2 | 1 | 16 | 3 | 4 | 13.20 | 2.39 | 22.00 | 6  | 5.40 | 0.90 | 9.45  |
| 2 | 1 | 16 | 3 | 5 | 11.20 | 2.10 | 18.87 | 6  | 5.18 | 0.86 | 8.83  |
| 2 | 1 | 16 | 3 | 6 | 9.50  | 2.40 | 14.15 | 5  | 3.36 | 0.67 | 4.60  |
| 2 | 1 | 16 | 3 | 7 | 11.30 | 2.05 | 10.84 | 4  | 2.19 | 0.55 | 2.30  |
| 2 | 1 | 16 | 3 | 8 | 11.50 | 2.24 | 13.72 | 4  | 6.64 | 1.66 | 5.40  |
| 2 | 1 | 1  | 1 | 1 | 9.20  | 2.45 | 21.11 | 8  | 4.38 | 0.55 | 10.47 |
| 2 | 1 | 1  | 1 | 2 | 10.10 | 2.20 | 14.51 | 6  | 3.24 | 0.54 | 6.11  |
| 2 | 1 | 1  | 1 | 3 | 7.30  | 2.20 | 7.00  | 3  | 2.07 | 0.69 | 3.20  |
| 2 | 1 | 1  | 1 | 4 | 6.70  | 2.15 | 8.34  | 3  | 1.84 | 0.61 | 4.30  |
| 2 | 1 | 1  | 1 | 5 | 8.70  | 2.30 | 8.69  | 3  | 3.02 | 1.01 | 4.48  |
| 2 | 1 | 1  | 1 | 6 | 7.30  | 1.95 | 5.74  | 2  | 1.76 | 0.88 | 3.33  |
| 2 | 1 | 1  | 1 | 7 | 7.10  | 2.15 | 8.71  | 3  | 2.58 | 0.86 | 3.92  |
| 2 | 1 | 1  | 1 | 8 | 7.00  | 2.10 | 8.81  | 3  | 2.35 | 0.78 | 4.43  |
| 2 | 1 | 1  | 2 | 1 | 11.60 | 2.25 | 16.70 | 4  | 1.71 | 0.43 | 5.33  |
| 2 | 1 | 1  | 2 | 2 | 14.80 | 2.40 | 26.98 | 12 | 6.94 | 0.58 | 13.05 |
| 2 | 1 | 1  | 2 | 3 | 8.70  | 2.14 | 8.98  | 2  | 1.09 | 0.55 | 3.07  |
| 2 | 1 | 1  | 2 | 4 | 8.40  | 1.96 | 6.04  | 1  | 0.42 | 0.42 | 3.32  |
| 2 | 1 | 1  | 2 | 5 | 9.00  | 2.20 | 8.80  | 2  | 0.83 | 0.42 | 4.77  |
| 2 | 1 | 1  | 2 | 6 | 8.30  | 1.80 | 5.49  | 2  | 0.70 | 0.35 | 2.92  |
| 2 | 1 | 1  | 2 | 7 | 5.90  | 2.10 | 4.36  | 1  | 0.34 | 0.34 | 2.80  |
| 2 | 1 | 1  | 2 | 8 | 8.20  | 1.85 | 7.36  | 2  | 0.64 | 0.32 | 4.28  |
| 2 | 1 | 1  | 3 | 1 | 10.20 | 1.95 | 9.54  | 2  | 1.27 | 0.64 | 4.50  |
| 2 | 1 | 1  | 3 | 2 | 7.70  | 2.05 | 7.39  | 3  | 1.24 | 0.41 | 3.42  |

|   |   |    |   |   |       |      |       |    |      |      |      |
|---|---|----|---|---|-------|------|-------|----|------|------|------|
| 2 | 1 | 1  | 3 | 3 | 8.50  | 2.29 | 9.69  | 4  | 1.48 | 0.37 | 4.90 |
| 2 | 1 | 1  | 3 | 4 | 8.00  | 1.95 | 7.18  | 3  | 0.75 | 0.25 | 3.34 |
| 2 | 1 | 1  | 3 | 5 | 6.00  | 2.15 | 6.74  | 2  | 1.29 | 0.65 | 3.18 |
| 2 | 1 | 1  | 3 | 6 | 6.00  | 2.15 | 6.93  | 3  | 1.29 | 0.43 | 2.97 |
| 2 | 1 | 1  | 3 | 7 | 8.70  | 2.20 | 8.28  | 3  | 1.18 | 0.39 | 4.09 |
| 2 | 1 | 1  | 3 | 8 | 7.10  | 1.65 | 5.87  | 2  | 0.82 | 0.41 | 3.21 |
| 2 | 1 | 3  | 1 | 1 | 14.40 | 2.15 | 17.53 | 5  | 2.69 | 0.54 | 5.00 |
| 2 | 1 | 3  | 1 | 2 | 14.40 | 2.00 | 15.21 | 7  | 3.74 | 0.53 | 6.65 |
| 2 | 1 | 3  | 1 | 3 | 12.80 | 2.09 | 16.69 | 6  | 4.58 | 0.76 | 5.01 |
| 2 | 1 | 3  | 1 | 4 | 13.00 | 2.15 | 15.57 | 8  | 4.33 | 0.54 | 5.22 |
| 2 | 1 | 3  | 1 | 5 | 11.00 | 1.85 | 12.93 | 5  | 3.66 | 0.73 | 4.15 |
| 2 | 1 | 3  | 1 | 6 | 17.70 | 2.00 | 19.74 | 11 | 5.13 | 0.47 | 8.39 |
| 2 | 1 | 3  | 1 | 7 | 14.20 | 2.00 | 15.34 | 4  | 2.40 | 0.60 | 4.62 |
| 2 | 1 | 3  | 1 | 8 | 13.10 | 2.00 | 11.89 | 6  | 2.45 | 0.41 | 5.97 |
| 2 | 1 | 3  | 2 | 1 | 19.00 | 2.00 | 24.30 | 11 | 6.89 | 0.63 | 8.45 |
| 2 | 1 | 3  | 2 | 2 | 11.50 | 1.99 | 19.52 | 8  | 6.09 | 0.76 | 6.16 |
| 2 | 1 | 3  | 2 | 3 | 16.10 | 2.09 | 23.28 | 9  | 6.12 | 0.68 | 7.88 |
| 2 | 1 | 3  | 2 | 4 | 14.60 | 2.05 | 22.83 | 9  | 7.47 | 0.83 | 7.37 |
| 2 | 1 | 3  | 2 | 5 | 12.40 | 2.10 | 14.45 | 7  | 3.84 | 0.55 | 4.96 |
| 2 | 1 | 3  | 2 | 6 | 14.20 | 2.40 | 18.83 | 7  | 3.50 | 0.50 | 5.86 |
| 2 | 1 | 3  | 2 | 7 | 14.00 | 2.11 | 17.37 | 8  | 4.82 | 0.60 | 6.26 |
| 2 | 1 | 3  | 2 | 8 | 11.60 | 2.15 | 14.03 | 7  | 3.81 | 0.54 | 4.98 |
| 2 | 1 | 3  | 3 | 1 | 15.10 | 2.25 | 20.98 | 8  | 6.33 | 0.79 | 6.85 |
| 2 | 1 | 3  | 3 | 2 | 12.00 | 1.89 | 14.30 | 8  | 5.68 | 0.71 | 4.75 |
| 2 | 1 | 3  | 3 | 3 | 11.40 | 2.05 | 14.36 | 6  | 4.89 | 0.82 | 4.24 |
| 2 | 1 | 3  | 3 | 4 | 9.50  | 2.14 | 10.07 | 4  | 3.36 | 0.84 | 3.21 |
| 2 | 1 | 3  | 3 | 5 | 13.90 | 1.90 | 16.70 | 9  | 5.61 | 0.62 | 5.24 |
| 2 | 1 | 3  | 3 | 6 | 17.00 | 2.09 | 21.72 | 9  | 7.74 | 0.86 | 6.42 |
| 2 | 1 | 3  | 3 | 7 | 13.20 | 2.10 | 15.42 | 5  | 3.74 | 0.75 | 3.15 |
| 2 | 1 | 3  | 3 | 8 | 11.80 | 1.95 | 10.62 | 4  | 3.17 | 0.79 | 5.62 |
| 2 | 1 | 15 | 1 | 1 | 17.20 | 2.10 | 18.44 | 1  | 6.37 | 6.37 | 8.66 |
| 2 | 1 | 15 | 1 | 2 | 15.00 | 2.20 | 20.68 | 10 | 5.80 | 0.58 | 9.57 |
| 2 | 1 | 15 | 1 | 3 | 11.00 | 2.05 | 13.65 | 6  | 5.82 | 0.97 | 5.48 |
| 2 | 1 | 15 | 1 | 4 | 10.00 | 2.05 | 10.69 | 5  | 3.66 | 0.73 | 4.31 |
| 2 | 1 | 15 | 1 | 5 | 11.20 | 1.95 | 11.63 | 5  | 4.04 | 0.81 | 4.42 |
| 2 | 1 | 15 | 1 | 6 | 11.50 | 2.00 | 12.70 | 6  | 4.62 | 0.77 | 4.66 |

|   |   |    |   |   |       |      |       |    |      |      |      |
|---|---|----|---|---|-------|------|-------|----|------|------|------|
| 2 | 1 | 15 | 1 | 7 | 11.60 | 2.03 | 11.55 | 5  | 2.92 | 0.58 | 4.97 |
| 2 | 1 | 15 | 1 | 8 | 11.10 | 2.10 | 11.80 | 4  | 2.91 | 0.73 | 5.17 |
| 2 | 1 | 15 | 2 | 1 | 16.60 | 2.19 | 17.35 | 6  | 1.55 | 0.26 | 6.50 |
| 2 | 1 | 15 | 2 | 2 | 16.70 | 2.15 | 22.94 | 11 | 7.63 | 0.69 | 8.45 |
| 2 | 1 | 15 | 2 | 3 | 17.80 | 2.00 | 23.90 | 12 | 6.70 | 0.56 | 9.71 |
| 2 | 1 | 15 | 2 | 4 | 11.80 | 1.95 | 12.11 | 6  | 3.11 | 0.52 | 5.04 |
| 2 | 1 | 15 | 2 | 5 | 16.10 | 2.00 | 15.87 | 6  | 1.47 | 0.25 | 8.03 |
| 2 | 1 | 15 | 2 | 6 | 15.00 | 2.15 | 15.11 | 6  | 1.20 | 0.20 | 6.20 |
| 2 | 1 | 15 | 2 | 7 | 14.80 | 2.14 | 19.65 | 7  | 4.87 | 0.70 | 7.27 |
| 2 | 1 | 15 | 2 | 8 | 11.00 | 1.85 | 11.42 | 7  | 3.45 | 0.49 | 3.98 |
| 2 | 1 | 15 | 3 | 1 | 13.00 | 2.15 | 17.01 | 7  | 5.07 | 0.72 | 5.76 |
| 2 | 1 | 15 | 3 | 2 | 11.80 | 2.14 | 10.13 | 5  | 1.54 | 0.31 | 2.04 |
| 2 | 1 | 15 | 3 | 3 | 12.90 | 1.90 | 12.05 | 5  | 3.60 | 0.72 | 4.22 |
| 2 | 1 | 15 | 3 | 4 | 12.00 | 1.95 | 10.81 | 6  | 3.22 | 0.54 | 2.56 |
| 2 | 1 | 15 | 3 | 5 | 9.30  | 1.65 | 7.57  | 5  | 1.77 | 0.35 | 1.80 |
| 2 | 1 | 15 | 3 | 6 | 11.50 | 2.00 | 11.10 | 5  | 2.74 | 0.55 | 3.77 |
| 2 | 1 | 15 | 3 | 7 | 8.70  | 1.85 | 7.22  | 4  | 1.30 | 0.33 | 2.78 |
| 2 | 1 | 15 | 3 | 8 | 11.70 | 1.95 | 11.54 | 5  | 3.34 | 0.67 | 3.94 |
| 2 | 1 | 14 | 1 | 1 | 14.10 | 2.06 | 16.42 | 5  | 1.57 | 0.31 | 7.65 |
| 2 | 1 | 14 | 1 | 2 | 9.90  | 2.05 | 10.14 | 4  | 2.29 | 0.57 | 2.77 |
| 2 | 1 | 14 | 1 | 3 | 8.40  | 2.05 | 8.04  | 4  | 1.39 | 0.35 | 2.74 |
| 2 | 1 | 14 | 1 | 4 | 13.50 | 1.95 | 14.94 | 7  | 1.83 | 0.26 | 5.91 |
| 2 | 1 | 14 | 1 | 5 | 10.90 | 2.01 | 11.57 | 6  | 1.95 | 0.33 | 3.72 |
| 2 | 1 | 14 | 1 | 6 | 9.40  | 1.70 | 7.20  | 2  | 0.70 | 0.35 | 3.22 |
| 2 | 1 | 14 | 1 | 7 | 8.80  | 1.70 | 6.60  | 3  | 0.57 | 0.19 | 2.69 |
| 2 | 1 | 14 | 1 | 8 | 4.60  | 1.70 | 5.83  | 2  | 0.62 | 0.31 | 2.27 |
| 2 | 1 | 14 | 2 | 1 | 10.70 | 2.15 | 12.98 | 6  | 3.75 | 0.63 | 4.52 |
| 2 | 1 | 14 | 2 | 2 | 8.00  | 1.90 | 7.74  | 2  | 1.18 | 0.59 | 2.94 |
| 2 | 1 | 14 | 2 | 3 | 13.70 | 2.30 | 19.23 | 9  | 5.45 | 0.61 | 6.16 |
| 2 | 1 | 14 | 2 | 4 | 12.30 | 2.25 | 18.67 | 10 | 6.50 | 0.65 | 5.72 |
| 2 | 1 | 14 | 2 | 5 | 10.20 | 2.10 | 12.76 | 5  | 2.86 | 0.57 | 4.12 |
| 2 | 1 | 14 | 2 | 6 | 11.80 | 2.20 | 14.09 | 5  | 2.53 | 0.51 | 5.40 |
| 2 | 1 | 14 | 2 | 7 | 9.00  | 2.15 | 11.23 | 5  | 3.21 | 0.64 | 4.14 |
| 2 | 1 | 14 | 2 | 8 | 9.20  | 2.25 | 10.46 | 5  | 3.12 | 0.62 | 3.92 |
| 2 | 1 | 14 | 3 | 1 | 12.80 | 2.05 | 15.00 | 8  | 4.18 | 0.52 | 4.33 |
| 2 | 1 | 14 | 3 | 2 | 10.50 | 2.10 | 11.99 | 4  | 2.72 | 0.68 | 4.90 |

|   |   |    |   |   |       |      |       |    |      |      |       |
|---|---|----|---|---|-------|------|-------|----|------|------|-------|
| 2 | 1 | 14 | 3 | 3 | 11.10 | 2.05 | 12.55 | 6  | 3.62 | 0.60 | 4.15  |
| 2 | 1 | 14 | 3 | 4 | 10.50 | 2.10 | 11.65 | 3  | 1.18 | 0.39 | 3.27  |
| 2 | 1 | 14 | 3 | 5 | 9.10  | 1.95 | 9.69  | 10 | 3.97 | 0.40 | 5.68  |
| 2 | 1 | 14 | 3 | 6 | 10.80 | 2.20 | 13.13 | 7  | 3.28 | 0.47 | 4.21  |
| 2 | 1 | 14 | 3 | 7 | 8.40  | 2.00 | 9.49  | 4  | 2.32 | 0.58 | 3.95  |
| 2 | 1 | 14 | 3 | 8 | 6.20  | 2.10 | 6.99  | 4  | 2.05 | 0.51 | 2.50  |
| 2 | 1 | 4  | 1 | 1 | 19.00 | 2.35 | 29.94 | 12 | 6.07 | 0.51 | 15.43 |
| 2 | 1 | 4  | 1 | 2 | 15.50 | 2.30 | 22.71 | 6  | 3.36 | 0.56 | 12.59 |
| 2 | 1 | 4  | 1 | 3 | 14.60 | 2.15 | 16.01 | 4  | 1.44 | 0.36 | 7.10  |
| 2 | 1 | 4  | 1 | 4 | 14.50 | 2.35 | 20.84 | 6  | 3.28 | 0.55 | 10.52 |
| 2 | 1 | 4  | 1 | 5 | 14.10 | 2.35 | 23.77 | 8  | 4.49 | 0.56 | 10.57 |
| 2 | 1 | 4  | 1 | 6 | 22.50 | 2.20 | 30.20 | 11 | 5.33 | 0.48 | 15.28 |
| 2 | 1 | 4  | 1 | 7 | 13.50 | 2.35 | 18.83 | 6  | 3.26 | 0.54 | 7.99  |
| 2 | 1 | 4  | 1 | 8 | 12.30 | 1.95 | 16.68 | 6  | 2.66 | 0.44 | 8.00  |
| 2 | 1 | 4  | 2 | 1 | 16.70 | 2.35 | 27.58 | 10 | 5.10 | 0.51 | 13.56 |
| 2 | 1 | 4  | 2 | 2 | 18.20 | 2.40 | 23.50 | 11 | 5.75 | 0.52 | 10.42 |
| 2 | 1 | 4  | 2 | 3 | 18.30 | 2.40 | 30.50 | 9  | 6.41 | 0.71 | 14.97 |
| 2 | 1 | 4  | 2 | 4 | 17.60 | 2.60 | 25.06 | 4  | 2.25 | 0.56 | 13.57 |
| 2 | 1 | 4  | 2 | 5 | 16.40 | 2.35 | 24.94 | 8  | 4.16 | 0.52 | 11.88 |
| 2 | 1 | 4  | 2 | 6 | 21.00 | 2.50 | 35.48 | 9  | 5.56 | 0.62 | 16.57 |
| 2 | 1 | 4  | 2 | 7 | 15.60 | 2.55 | 24.26 | 9  | 5.62 | 0.62 | 12.35 |
| 2 | 1 | 4  | 2 | 8 | 12.50 | 2.60 | 21.27 | 7  | 4.55 | 0.65 | 11.47 |
| 2 | 1 | 4  | 3 | 1 | 18.50 | 2.30 | 25.94 | 7  | 4.70 | 0.67 | 12.53 |
| 2 | 1 | 4  | 3 | 2 | 19.00 | 2.50 | 32.98 | 15 | 7.24 | 0.48 | 14.36 |
| 2 | 1 | 4  | 3 | 3 | 12.40 | 2.20 | 18.67 | 6  | 3.30 | 0.55 | 8.79  |
| 2 | 1 | 4  | 3 | 4 | 18.00 | 2.20 | 30.87 | 13 | 6.57 | 0.51 | 14.64 |
| 2 | 1 | 4  | 3 | 5 | 13.00 | 2.25 | 18.27 | 6  | 2.52 | 0.42 | 9.10  |
| 2 | 1 | 4  | 3 | 6 | 19.00 | 2.30 | 17.35 | 8  | 3.69 | 0.46 | 8.46  |
| 2 | 1 | 4  | 3 | 7 | 13.50 | 2.45 | 21.17 | 5  | 2.68 | 0.54 | 10.36 |
| 2 | 1 | 4  | 3 | 8 | 13.20 | 2.60 | 24.65 | 6  | 3.32 | 0.55 | 13.96 |
| 2 | 1 | 6  | 1 | 1 | 13.20 | 2.05 | 19.35 | 9  | 6.09 | 0.68 | 5.81  |
| 2 | 1 | 6  | 1 | 2 | 11.80 | 1.95 | 14.07 | 8  | 4.76 | 0.60 | 2.29  |
| 2 | 1 | 6  | 1 | 3 | 12.10 | 2.00 | 15.32 | 6  | 4.07 | 0.68 | 2.58  |
| 2 | 1 | 6  | 1 | 4 | 14.50 | 2.15 | 21.25 | 11 | 7.40 | 0.67 | 6.31  |
| 2 | 1 | 6  | 1 | 5 | 13.60 | 2.05 | 16.95 | 8  | 4.91 | 0.61 | 3.62  |
| 2 | 1 | 6  | 1 | 6 | 11.20 | 1.90 | 14.50 | 9  | 4.34 | 0.48 | 5.32  |

|   |   |    |   |   |       |      |       |    |      |      |       |
|---|---|----|---|---|-------|------|-------|----|------|------|-------|
| 2 | 1 | 6  | 1 | 7 | 12.70 | 2.25 | 13.00 | 11 | 7.12 | 0.65 | 7.24  |
| 2 | 1 | 6  | 1 | 8 | 13.10 | 1.95 | 21.04 | 7  | 4.42 | 0.63 | 1.94  |
| 2 | 1 | 6  | 2 | 1 | 10.40 | 2.15 | 10.54 | 4  | 2.46 | 0.62 | 3.89  |
| 2 | 1 | 6  | 2 | 2 | 13.70 | 2.15 | 20.96 | 10 | 6.96 | 0.70 | 6.83  |
| 2 | 1 | 6  | 2 | 3 | 10.90 | 1.80 | 11.99 | 5  | 3.44 | 0.69 | 6.06  |
| 2 | 1 | 6  | 2 | 4 | 10.10 | 2.05 | 12.77 | 9  | 6.59 | 0.73 | 6.56  |
| 2 | 1 | 6  | 2 | 5 | 14.30 | 2.15 | 21.50 | 7  | 5.64 | 0.81 | 3.77  |
| 2 | 1 | 6  | 2 | 6 | 10.20 | 1.95 | 11.35 | 5  | 3.30 | 0.66 | 4.63  |
| 2 | 1 | 6  | 2 | 7 | 12.20 | 1.80 | 13.33 | 7  | 4.20 | 0.60 | 3.45  |
| 2 | 1 | 6  | 2 | 8 | 9.90  | 2.10 | 10.90 | 5  | 3.29 | 0.66 | 3.97  |
| 2 | 1 | 6  | 3 | 1 | 12.80 | 2.00 | 19.79 | 6  | 3.23 | 0.54 | 4.52  |
| 2 | 1 | 6  | 3 | 2 | 11.00 | 1.80 | 19.79 | 11 | 6.94 | 0.63 | 6.30  |
| 2 | 1 | 6  | 3 | 3 | 10.00 | 1.85 | 12.49 | 6  | 3.56 | 0.59 | 4.61  |
| 2 | 1 | 6  | 3 | 4 | 11.80 | 1.85 | 13.47 | 6  | 4.11 | 0.69 | 5.59  |
| 2 | 1 | 6  | 3 | 5 | 10.40 | 1.95 | 9.39  | 4  | 2.49 | 0.62 | 3.60  |
| 2 | 1 | 6  | 3 | 6 | 9.00  | 2.10 | 10.43 | 4  | 2.86 | 0.72 | 4.05  |
| 2 | 1 | 6  | 3 | 7 | 9.30  | 1.75 | 6.88  | 4  | 1.64 | 0.41 | 2.44  |
| 2 | 1 | 6  | 3 | 8 | 8.00  | 1.90 | 10.46 | 5  | 3.17 | 0.63 | 4.08  |
| 2 | 1 | 19 | 1 | 1 | 13.00 | 2.05 | 17.20 | 5  | 3.78 | 0.76 | 6.76  |
| 2 | 1 | 19 | 1 | 2 | 8.10  | 2.02 | 7.78  | 3  | 1.14 | 0.38 | 3.23  |
| 2 | 1 | 19 | 1 | 3 | 16.30 | 2.55 | 25.45 | 6  | 5.50 | 0.92 | 13.22 |
| 2 | 1 | 19 | 1 | 4 | 9.20  | 2.25 | 15.00 | 6  | 4.27 | 0.71 | 6.16  |
| 2 | 1 | 19 | 1 | 5 | 6.70  | 2.15 | 7.52  | 2  | 1.65 | 0.83 | 3.63  |
| 2 | 1 | 19 | 1 | 6 | 7.10  | 2.30 | 8.85  | 3  | 2.24 | 0.75 | 3.67  |
| 2 | 1 | 19 | 1 | 7 | 12.10 | 2.35 | 11.91 | 4  | 2.64 | 0.66 | 4.85  |
| 2 | 1 | 19 | 1 | 8 | 6.50  | 1.60 | 5.23  | 3  | 1.46 | 0.49 | 1.95  |
| 2 | 1 | 19 | 2 | 1 | 12.60 | 2.30 | 20.24 | 3  | 2.36 | 0.79 | 4.45  |
| 2 | 1 | 19 | 2 | 2 | 8.00  | 2.30 | 6.87  | 5  | 3.75 | 0.75 | 4.03  |
| 2 | 1 | 19 | 2 | 3 | 7.70  | 2.10 | 9.55  | 3  | 2.40 | 0.80 | 8.66  |
| 2 | 1 | 19 | 2 | 4 | 13.00 | 2.15 | 18.00 | 7  | 5.20 | 0.74 | 7.40  |
| 2 | 1 | 19 | 2 | 5 | 7.80  | 2.25 | 9.51  | 3  | 2.41 | 0.80 | 4.77  |
| 2 | 1 | 19 | 2 | 6 | 8.50  | 1.90 | 8.51  | 7  | 2.26 | 0.32 | 4.32  |
| 2 | 1 | 19 | 2 | 7 | 7.40  | 2.15 | 9.45  | 3  | 2.57 | 0.86 | 3.70  |
| 2 | 1 | 19 | 2 | 8 | 6.90  | 2.15 | 7.57  | 2  | 1.68 | 0.84 | 2.65  |
| 2 | 1 | 19 | 3 | 1 | 12.60 | 2.40 | 23.62 | 7  | 6.62 | 0.95 | 9.93  |
| 2 | 1 | 19 | 3 | 2 | 12.90 | 2.35 | 17.91 | 3  | 4.27 | 1.42 | 8.18  |



|   |   |    |   |   |       |      |       |    |      |      |      |
|---|---|----|---|---|-------|------|-------|----|------|------|------|
| 2 | 1 | 19 | 3 | 3 | 9.20  | 2.30 | 10.25 | 5  | 2.47 | 0.49 | 4.48 |
| 2 | 1 | 19 | 3 | 4 | 7.80  | 2.15 | 8.31  | 5  | 2.30 | 0.46 | 5.07 |
| 2 | 1 | 19 | 3 | 5 | 8.90  | 2.15 | 9.55  | 2  | 1.69 | 0.85 | 3.36 |
| 2 | 1 | 19 | 3 | 6 | 8.90  | 2.15 | 8.30  | 3  | 2.10 | 0.70 | 3.64 |
| 2 | 1 | 19 | 3 | 7 | 6.20  | 2.25 | 8.62  | 3  | 2.18 | 0.73 | 3.50 |
| 2 | 1 | 19 | 3 | 8 | 5.50  | 2.30 | 6.93  | 2  | 1.77 | 0.89 | 2.86 |
| 2 | 1 | 13 | 1 | 1 | 9.50  | 2.15 | 7.10  | 2  | 0.97 | 0.49 | 2.96 |
| 2 | 1 | 13 | 1 | 2 | 11.20 | 1.85 | 6.98  | 3  | 1.14 | 0.38 | 2.24 |
| 2 | 1 | 13 | 1 | 3 | 9.80  | 2.10 | 8.95  | 4  | 2.67 | 0.67 | 2.85 |
| 2 | 1 | 13 | 1 | 4 | 15.30 | 1.95 | 15.57 | 6  | 3.70 | 0.62 | 5.79 |
| 2 | 1 | 13 | 1 | 5 | 17.60 | 1.65 | 13.22 | 8  | 4.01 | 0.50 | 3.73 |
| 2 | 1 | 13 | 1 | 6 | 9.70  | 2.05 | 11.73 | 5  | 3.31 | 0.66 | 4.71 |
| 2 | 1 | 13 | 1 | 7 | 17.50 | 1.85 | 14.13 | 4  | 2.12 | 0.53 | 7.32 |
| 2 | 1 | 13 | 1 | 8 | 7.10  | 1.90 | 6.32  | 2  | 1.51 | 0.76 | 2.69 |
| 2 | 1 | 13 | 2 | 1 | 20.40 | 2.10 | 19.14 | 5  | 2.13 | 0.43 | 5.77 |
| 2 | 1 | 13 | 2 | 2 | 14.50 | 1.95 | 12.35 | 3  | 1.49 | 0.50 | 5.22 |
| 2 | 1 | 13 | 2 | 3 | 12.10 | 1.95 | 9.49  | 2  | 1.07 | 0.54 | 5.20 |
| 2 | 1 | 13 | 2 | 4 | 13.10 | 2.15 | 15.67 | 6  | 3.49 | 0.58 | 5.87 |
| 2 | 1 | 13 | 2 | 5 | 12.10 | 1.95 | 8.15  | 3  | 1.42 | 0.47 | 4.75 |
| 2 | 1 | 13 | 2 | 6 | 19.40 | 1.80 | 21.33 | 6  | 1.98 | 0.33 | 9.38 |
| 2 | 1 | 13 | 2 | 7 | 12.10 | 2.00 | 18.10 | 6  | 3.17 | 0.53 | 7.94 |
| 2 | 1 | 13 | 2 | 8 | 12.30 | 1.90 | 9.92  | 2  | 1.23 | 0.62 | 3.55 |
| 2 | 1 | 13 | 3 | 1 | 12.40 | 2.00 | 8.21  | 1  | 0.63 | 0.63 | 3.24 |
| 2 | 1 | 13 | 3 | 2 | 18.20 | 1.90 | 17.06 | 4  | 0.90 | 0.23 | 7.16 |
| 2 | 1 | 13 | 3 | 3 | 11.00 | 1.95 | 9.94  | 2  | 0.96 | 0.48 | 4.64 |
| 2 | 1 | 13 | 3 | 4 | 6.50  | 2.15 | 6.99  | 3  | 1.06 | 0.35 | 2.42 |
| 2 | 1 | 13 | 3 | 5 | 7.40  | 2.20 | 9.19  | 3  | 2.25 | 0.75 | 4.09 |
| 2 | 1 | 13 | 3 | 6 | 9.30  | 1.75 | 9.67  | 4  | 2.42 | 0.61 | 2.05 |
| 2 | 1 | 13 | 3 | 7 | 9.00  | 1.90 | 9.73  | 4  | 1.61 | 0.40 | 2.89 |
| 2 | 1 | 13 | 3 | 8 | 6.00  | 1.80 | 6.33  | 3  | 1.56 | 0.52 | 2.78 |
| 2 | 1 | 5  | 1 | 1 | 13.10 | 1.85 | 13.95 | 9  | 4.70 | 0.52 | 5.70 |
| 2 | 1 | 5  | 1 | 2 | 9.90  | 1.90 | 10.78 | 5  | 3.27 | 0.65 | 4.36 |
| 2 | 1 | 5  | 1 | 3 | 12.00 | 1.95 | 15.23 | 9  | 5.04 | 0.56 | 5.55 |
| 2 | 1 | 5  | 1 | 4 | 9.50  | 1.65 | 9.73  | 8  | 3.30 | 0.41 | 4.02 |
| 2 | 1 | 5  | 1 | 5 | 13.20 | 2.00 | 15.17 | 9  | 5.82 | 0.65 | 6.18 |
| 2 | 1 | 5  | 1 | 6 | 11.10 | 1.70 | 13.48 | 11 | 4.48 | 0.41 | 4.54 |

|   |   |   |   |   |       |      |       |    |      |      |      |
|---|---|---|---|---|-------|------|-------|----|------|------|------|
| 2 | 1 | 5 | 1 | 7 | 8.00  | 1.65 | 8.03  | 5  | 2.57 | 0.51 | 2.80 |
| 2 | 1 | 5 | 1 | 8 | 6.10  | 1.90 | 5.50  | 3  | 1.87 | 0.62 | 2.39 |
| 2 | 1 | 5 | 2 | 1 | 13.00 | 1.90 | 15.32 | 7  | 3.02 | 0.43 | 6.55 |
| 2 | 1 | 5 | 2 | 2 | 9.20  | 1.70 | 8.89  | 5  | 1.91 | 0.38 | 4.68 |
| 2 | 1 | 5 | 2 | 3 | 10.20 | 1.75 | 10.20 | 4  | 2.31 | 0.58 | 5.19 |
| 2 | 1 | 5 | 2 | 4 | 12.80 | 1.90 | 13.70 | 9  | 3.17 | 0.35 | 5.74 |
| 2 | 1 | 5 | 2 | 5 | 8.10  | 1.65 | 5.84  | 3  | 1.14 | 0.38 | 2.06 |
| 2 | 1 | 5 | 2 | 6 | 8.30  | 1.65 | 7.97  | 5  | 2.37 | 0.47 | 3.60 |
| 2 | 1 | 5 | 2 | 7 | 7.30  | 1.70 | 5.67  | 3  | 1.25 | 0.42 | 2.72 |
| 2 | 1 | 5 | 2 | 8 | 12.40 | 1.75 | 8.50  | 6  | 2.59 | 0.43 | 3.40 |
| 2 | 1 | 5 | 3 | 1 | 11.60 | 1.90 | 13.94 | 6  | 3.46 | 0.58 | 5.72 |
| 2 | 1 | 5 | 3 | 2 | 11.60 | 1.85 | 12.58 | 8  | 3.94 | 0.49 | 5.13 |
| 2 | 1 | 5 | 3 | 3 | 12.00 | 1.90 | 14.99 | 9  | 3.83 | 0.43 | 5.62 |
| 2 | 1 | 5 | 3 | 4 | 14.90 | 2.15 | 19.03 | 17 | 9.12 | 0.54 | 8.29 |
| 2 | 1 | 5 | 3 | 5 | 12.10 | 1.85 | 13.25 | 9  | 4.76 | 0.53 | 5.65 |
| 2 | 1 | 5 | 3 | 6 | 11.40 | 1.95 | 15.40 | 8  | 3.61 | 0.45 | 6.26 |
| 2 | 1 | 5 | 3 | 7 | 11.40 | 1.70 | 11.94 | 5  | 2.62 | 0.52 | 4.72 |
| 2 | 1 | 5 | 3 | 8 | 8.30  | 1.90 | 9.34  | 4  | 2.39 | 0.60 | 4.43 |
| 2 | 1 | 2 | 1 | 1 | 11.30 | 2.00 | 14.18 | 7  | 5.41 | 0.77 | 4.86 |
| 2 | 1 | 2 | 1 | 2 | 13.60 | 1.85 | 14.99 | 9  | 5.36 | 0.60 | 4.73 |
| 2 | 1 | 2 | 1 | 3 | 11.90 | 2.05 | 14.57 | 7  | 4.67 | 0.67 | 5.36 |
| 2 | 1 | 2 | 1 | 4 | 13.20 | 1.85 | 8.74  | 3  | 1.42 | 0.47 | 6.83 |
| 2 | 1 | 2 | 1 | 5 | 9.00  | 1.90 | 2.38  | 4  | 2.63 | 0.66 | 3.75 |
| 2 | 1 | 2 | 1 | 6 | 15.00 | 1.80 | 19.31 | 9  | 5.94 | 0.66 | 7.49 |
| 2 | 1 | 2 | 1 | 7 | 16.60 | 1.80 | 14.15 | 6  | 3.28 | 0.55 | 4.69 |
| 2 | 1 | 2 | 1 | 8 | 12.20 | 2.00 | 12.58 | 6  | 3.28 | 0.55 | 5.11 |
| 2 | 1 | 2 | 2 | 1 | 12.60 | 2.15 | 15.28 | 7  | 4.75 | 0.68 | 5.88 |
| 2 | 1 | 2 | 2 | 2 | 12.00 | 1.75 | 10.95 | 5  | 3.43 | 0.69 | 4.28 |
| 2 | 1 | 2 | 2 | 3 | 17.00 | 2.00 | 21.35 | 10 | 6.92 | 0.69 | 8.22 |
| 2 | 1 | 2 | 2 | 4 | 12.00 | 1.80 | 12.47 | 7  | 4.45 | 0.64 | 4.70 |
| 2 | 1 | 2 | 2 | 5 | 14.60 | 1.95 | 16.11 | 7  | 4.57 | 0.65 | 5.84 |
| 2 | 1 | 2 | 2 | 6 | 13.60 | 1.70 | 16.35 | 8  | 5.35 | 0.67 | 7.04 |
| 2 | 1 | 2 | 2 | 7 | 13.80 | 1.80 | 14.98 | 6  | 4.06 | 0.68 | 6.35 |
| 2 | 1 | 2 | 2 | 8 | 11.00 | 1.95 | 11.94 | 6  | 4.19 | 0.70 | 4.42 |
| 2 | 1 | 2 | 3 | 1 | 11.70 | 1.85 | 10.06 | 5  | 2.14 | 0.43 | 4.30 |
| 2 | 1 | 2 | 3 | 2 | 9.90  | 1.95 | 10.47 | 5  | 3.69 | 0.74 | 5.70 |

|   |   |    |   |   |       |      |       |    |      |      |      |
|---|---|----|---|---|-------|------|-------|----|------|------|------|
| 2 | 1 | 2  | 3 | 3 | 8.80  | 2.05 | 9.72  | 7  | 3.72 | 0.53 | 5.55 |
| 2 | 1 | 2  | 3 | 4 | 12.00 | 2.15 | 13.44 | 3  | 1.87 | 0.62 | 3.56 |
| 2 | 1 | 2  | 3 | 5 | 8.80  | 1.85 | 10.51 | 5  | 3.53 | 0.71 | 3.31 |
| 2 | 1 | 2  | 3 | 6 | 9.70  | 1.95 | 10.74 | 5  | 3.62 | 0.72 | 4.14 |
| 2 | 1 | 2  | 3 | 7 | 8.80  | 1.60 | 8.61  | 5  | 2.67 | 0.53 | 3.12 |
| 2 | 1 | 2  | 3 | 8 | 8.90  | 1.90 | 8.65  | 4  | 2.46 | 0.62 | 3.50 |
| 2 | 1 | 12 | 1 | 1 | 9.30  | 1.40 | 7.56  | 5  | 1.98 | 0.40 | 2.84 |
| 2 | 1 | 12 | 1 | 2 | 13.50 | 1.50 | 9.15  | 9  | 2.16 | 0.24 | 3.85 |
| 2 | 1 | 12 | 1 | 3 | 11.70 | 1.60 | 11.76 | 9  | 3.16 | 0.35 | 4.01 |
| 2 | 1 | 12 | 1 | 4 | 9.80  | 1.40 | 5.88  | 7  | 1.93 | 0.28 | 2.46 |
| 2 | 1 | 12 | 1 | 5 | 9.40  | 1.35 | 6.63  | 7  | 2.24 | 0.32 | 2.47 |
| 2 | 1 | 12 | 1 | 6 | 10.10 | 1.35 | 6.71  | 4  | 1.06 | 0.27 | 2.84 |
| 2 | 1 | 12 | 1 | 7 | 11.00 | 1.45 | 6.63  | 5  | 1.76 | 0.35 | 2.76 |
| 2 | 1 | 12 | 1 | 8 | 10.00 | 1.45 | 7.56  | 8  | 2.23 | 0.28 | 2.92 |
| 2 | 1 | 12 | 2 | 1 | 13.30 | 1.65 | 12.69 | 6  | 2.29 | 0.38 | 5.83 |
| 2 | 1 | 12 | 2 | 2 | 13.60 | 1.50 | 10.40 | 10 | 3.09 | 0.31 | 4.67 |
| 2 | 1 | 12 | 2 | 3 | 14.60 | 1.75 | 15.80 | 12 | 4.94 | 0.41 | 6.42 |
| 2 | 1 | 12 | 2 | 4 | 14.20 | 1.75 | 16.31 | 11 | 5.42 | 0.49 | 6.25 |
| 2 | 1 | 12 | 2 | 5 | 12.50 | 1.55 | 8.09  | 5  | 1.96 | 0.39 | 4.16 |
| 2 | 1 | 12 | 2 | 6 | 12.20 | 1.40 | 8.88  | 7  | 2.12 | 0.30 | 3.50 |
| 2 | 1 | 12 | 2 | 7 | 11.50 | 1.70 | 7.17  | 2  | 0.95 | 0.48 | 3.96 |
| 2 | 1 | 12 | 2 | 8 | 7.40  | 1.65 | 6.65  | 5  | 2.00 | 0.40 | 2.18 |
| 2 | 1 | 12 | 3 | 1 | 14.80 | 1.85 | 17.07 | 9  | 3.86 | 0.43 | 6.09 |
| 2 | 1 | 12 | 3 | 2 | 12.60 | 1.85 | 13.53 | 9  | 3.02 | 0.34 | 5.42 |
| 2 | 1 | 12 | 3 | 3 | 12.60 | 1.70 | 10.93 | 8  | 1.64 | 0.21 | 5.27 |
| 2 | 1 | 12 | 3 | 4 | 12.80 | 1.70 | 11.18 | 7  | 2.24 | 0.32 | 4.92 |
| 2 | 1 | 12 | 3 | 5 | 14.80 | 1.70 | 13.10 | 12 | 1.94 | 0.16 | 5.63 |
| 2 | 1 | 12 | 3 | 6 | 14.70 | 1.80 | 14.94 | 10 | 3.61 | 0.36 | 5.68 |
| 2 | 1 | 12 | 3 | 7 | 14.20 | 1.70 | 14.90 | 7  | 1.30 | 0.19 | 4.32 |
| 2 | 1 | 12 | 3 | 8 | 11.00 | 1.45 | 8.79  | 11 | 4.59 | 0.42 | 5.99 |
| 2 | 1 | 9  | 1 | 1 | 14.00 | 1.85 | 18.83 | 9  | 6.07 | 0.67 | 6.53 |
| 2 | 1 | 9  | 1 | 2 | 15.60 | 1.90 | 18.48 | 10 | 6.82 | 0.68 | 5.50 |
| 2 | 1 | 9  | 1 | 3 | 12.10 | 1.80 | 16.56 | 9  | 5.94 | 0.66 | 5.56 |
| 2 | 1 | 9  | 1 | 4 | 13.20 | 1.90 | 17.22 | 8  | 5.31 | 0.66 | 5.19 |
| 2 | 1 | 9  | 1 | 5 | 13.30 | 1.75 | 11.71 | 2  | 1.15 | 0.58 | 5.23 |
| 2 | 1 | 9  | 1 | 6 | 15.00 | 1.80 | 19.03 | 9  | 5.72 | 0.64 | 6.66 |

|   |   |    |   |   |       |      |       |    |      |      |      |
|---|---|----|---|---|-------|------|-------|----|------|------|------|
| 2 | 1 | 9  | 1 | 7 | 13.30 | 1.95 | 15.59 | 7  | 4.93 | 0.70 | 6.59 |
| 2 | 1 | 9  | 1 | 8 | 12.30 | 1.65 | 10.78 | 4  | 2.20 | 0.55 | 3.48 |
| 2 | 1 | 9  | 2 | 1 | 9.00  | 1.85 | 10.03 | 5  | 3.55 | 0.71 | 3.50 |
| 2 | 1 | 9  | 2 | 2 | 13.20 | 2.00 | 21.31 | 10 | 6.03 | 0.60 | 7.46 |
| 2 | 1 | 9  | 2 | 3 | 12.50 | 1.90 | 14.54 | 6  | 3.23 | 0.54 | 5.90 |
| 2 | 1 | 9  | 2 | 4 | 11.20 | 1.75 | 11.53 | 5  | 2.21 | 0.44 | 4.60 |
| 2 | 1 | 9  | 2 | 5 | 10.80 | 1.80 | 11.20 | 5  | 3.20 | 0.64 | 3.36 |
| 2 | 1 | 9  | 2 | 6 | 11.20 | 1.50 | 9.82  | 6  | 2.42 | 0.40 | 3.30 |
| 2 | 1 | 9  | 2 | 7 | 9.50  | 1.60 | 6.33  | 2  | 1.20 | 0.60 | 2.66 |
| 2 | 1 | 9  | 2 | 8 | 9.00  | 1.65 | 7.48  | 3  | 1.54 | 0.51 | 2.70 |
| 2 | 1 | 9  | 3 | 1 | 11.20 | 1.90 | 13.55 | 7  | 4.36 | 0.62 | 5.26 |
| 2 | 1 | 9  | 3 | 2 | 13.00 | 1.80 | 14.43 | 6  | 2.95 | 0.49 | 5.02 |
| 2 | 1 | 9  | 3 | 3 | 11.20 | 2.00 | 14.52 | 7  | 4.88 | 0.70 | 4.84 |
| 2 | 1 | 9  | 3 | 4 | 17.10 | 1.80 | 22.59 | 9  | 4.30 | 0.48 | 5.93 |
| 2 | 1 | 9  | 3 | 5 | 11.20 | 1.95 | 17.06 | 9  | 5.81 | 0.65 | 5.46 |
| 2 | 1 | 9  | 3 | 6 | 12.50 | 1.55 | 7.44  | 5  | 2.58 | 0.52 | 4.42 |
| 2 | 1 | 9  | 3 | 7 | 12.60 | 2.00 | 16.89 | 7  | 4.44 | 0.63 | 7.70 |
| 2 | 1 | 9  | 3 | 8 | 8.70  | 1.80 | 8.72  | 4  | 2.94 | 0.74 | 2.87 |
| 2 | 1 | 18 | 1 | 1 | 10.80 | 1.85 | 10.74 | 4  | 2.68 | 0.67 | 4.53 |
| 2 | 1 | 18 | 1 | 2 | 9.50  | 1.75 | 9.45  | 3  | 1.94 | 0.65 | 4.18 |
| 2 | 1 | 18 | 1 | 3 | 12.90 | 1.75 | 17.38 | 6  | 3.95 | 0.66 | 7.64 |
| 2 | 1 | 18 | 1 | 4 | 12.50 | 1.60 | 5.80  | 4  | 1.25 | 0.31 | 2.52 |
| 2 | 1 | 18 | 1 | 5 | 8.40  | 1.75 | 8.69  | 4  | 2.43 | 0.61 | 3.64 |
| 2 | 1 | 18 | 1 | 6 | 6.40  | 1.55 | 5.48  | 3  | 1.66 | 0.55 | 2.20 |
| 2 | 1 | 18 | 1 | 7 | 7.80  | 1.80 | 7.84  | 3  | 2.01 | 0.67 | 3.32 |
| 2 | 1 | 18 | 1 | 8 | 6.20  | 1.65 | 3.58  | 1  | 0.44 | 0.44 | 1.83 |
| 2 | 1 | 18 | 2 | 1 | 15.30 | 2.05 | 18.32 | 7  | 4.03 | 0.58 | 7.56 |
| 2 | 1 | 18 | 2 | 2 | 11.90 | 2.00 | 14.08 | 6  | 3.90 | 0.65 | 6.48 |
| 2 | 1 | 18 | 2 | 3 | 11.80 | 1.60 | 7.08  | 3  | 1.54 | 0.51 | 3.67 |
| 2 | 1 | 18 | 2 | 4 | 10.80 | 1.85 | 9.41  | 4  | 2.07 | 0.52 | 4.03 |
| 2 | 1 | 18 | 2 | 5 | 10.60 | 1.85 | 10.81 | 3  | 1.74 | 0.58 | 5.04 |
| 2 | 1 | 18 | 2 | 6 | 9.40  | 1.75 | 9.00  | 5  | 3.22 | 0.64 | 3.73 |
| 2 | 1 | 18 | 2 | 7 | 6.20  | 1.80 | 5.42  | 2  | 1.41 | 0.71 | 2.45 |
| 2 | 1 | 18 | 2 | 8 | 8.10  | 1.70 | 5.67  | 3  | 0.53 | 0.18 | 2.83 |
| 2 | 1 | 18 | 3 | 1 | 10.80 | 1.85 | 10.61 | 5  | 2.90 | 0.58 | 4.33 |
| 2 | 1 | 18 | 3 | 2 | 9.40  | 1.90 | 10.37 | 4  | 2.56 | 0.64 | 4.68 |

|   |   |    |   |   |       |      |       |   |      |      |      |
|---|---|----|---|---|-------|------|-------|---|------|------|------|
| 2 | 1 | 18 | 3 | 3 | 12.10 | 1.90 | 14.24 | 4 | 2.69 | 0.67 | 6.59 |
| 2 | 1 | 18 | 3 | 4 | 10.10 | 1.85 | 10.88 | 5 | 3.38 | 0.68 | 4.25 |
| 2 | 1 | 18 | 3 | 5 | 8.50  | 1.70 | 5.60  | 2 | 0.72 | 0.36 | 2.80 |
| 2 | 1 | 18 | 3 | 6 | 7.80  | 1.85 | 6.42  | 3 | 1.22 | 0.41 | 2.72 |
| 2 | 1 | 18 | 3 | 7 | 12.20 | 1.75 | 7.66  | 3 | 1.68 | 0.56 | 3.62 |
| 2 | 1 | 18 | 3 | 8 | 8.50  | 1.85 | 7.45  | 3 | 1.74 | 0.58 | 3.41 |
| 2 | 1 | 17 | 1 | 1 | 13.70 | 2.05 | 12.42 | 3 | 2.15 | 0.72 | 6.34 |
| 2 | 1 | 17 | 1 | 2 | 7.40  | 2.05 | 8.49  | 3 | 2.72 | 0.91 | 3.37 |
| 2 | 1 | 17 | 1 | 3 | 7.60  | 1.95 | 6.46  | 2 | 1.52 | 0.76 | 2.69 |
| 2 | 1 | 17 | 1 | 4 | 7.00  | 1.75 | 5.00  | 1 | 0.76 | 0.76 | 2.27 |
| 2 | 1 | 17 | 1 | 5 | 9.20  | 1.60 | 6.68  | 1 | 0.65 | 0.65 | 2.70 |
| 2 | 1 | 17 | 1 | 6 | 6.70  | 1.80 | 4.27  | 2 | 1.15 | 0.58 | 1.25 |
| 2 | 1 | 17 | 1 | 7 | 8.50  | 1.70 | 4.47  | 3 | 1.30 | 0.43 | 1.42 |
| 2 | 1 | 17 | 1 | 8 | 7.20  | 1.65 | 3.28  | 1 | 0.21 | 0.21 | 1.67 |
| 2 | 1 | 17 | 2 | 1 | 12.40 | 1.80 | 9.34  | 5 | 1.27 | 0.25 | 3.49 |
| 2 | 1 | 17 | 2 | 2 | 10.60 | 2.10 | 9.14  | 3 | 2.00 | 0.67 | 4.26 |
| 2 | 1 | 17 | 2 | 3 | 7.50  | 1.75 | 5.47  | 3 | 1.75 | 0.58 | 1.56 |
| 2 | 1 | 17 | 2 | 4 | 6.30  | 2.00 | 5.46  | 2 | 1.03 | 0.52 | 2.05 |
| 2 | 1 | 17 | 2 | 5 | 8.50  | 1.80 | 5.92  | 2 | 0.63 | 0.32 | 2.94 |
| 2 | 1 | 17 | 2 | 6 | 8.80  | 1.85 | 6.45  | 3 | 1.50 | 0.50 | 2.39 |
| 2 | 1 | 17 | 2 | 7 | 6.20  | 1.90 | 5.52  | 2 | 1.03 | 0.52 | 2.45 |
| 2 | 1 | 17 | 2 | 8 | 7.50  | 1.60 | 5.46  | 3 | 1.31 | 0.44 | 1.62 |
| 2 | 1 | 17 | 3 | 1 | 15.00 | 1.95 | 13.83 | 2 | 1.58 | 0.79 | 6.66 |
| 2 | 1 | 17 | 3 | 2 | 13.70 | 2.10 | 15.82 | 6 | 4.56 | 0.76 | 6.40 |
| 2 | 1 | 17 | 3 | 3 | 8.60  | 1.80 | 7.60  | 3 | 1.20 | 0.40 | 3.42 |
| 2 | 1 | 17 | 3 | 4 | 5.80  | 1.95 | 8.00  | 2 | 0.70 | 0.35 | 4.31 |
| 2 | 1 | 17 | 3 | 5 | 5.30  | 1.80 | 4.33  | 1 | 0.76 | 0.76 | 2.11 |
| 2 | 1 | 17 | 3 | 6 | 9.20  | 2.05 | 11.14 | 4 | 1.88 | 0.47 | 5.71 |
| 2 | 1 | 17 | 3 | 7 | 8.10  | 1.65 | 5.69  | 2 | 1.08 | 0.54 | 2.52 |
| 2 | 1 | 17 | 3 | 8 | 5.90  | 1.90 | 4.57  | 2 | 1.04 | 0.52 | 2.26 |
| 2 | 1 | 11 | 1 | 1 | 9.80  | 2.25 | 10.90 | 5 | 2.99 | 0.60 | 3.96 |
| 2 | 1 | 11 | 1 | 2 | 13.90 | 1.90 | 13.75 | 6 | 3.68 | 0.61 | 5.77 |
| 2 | 1 | 11 | 1 | 3 | 11.50 | 2.00 | 6.76  | 5 | 1.68 | 0.34 | 1.27 |
| 2 | 1 | 11 | 1 | 4 | 10.20 | 2.05 | 11.18 | 4 | 3.00 | 0.75 | 5.15 |
| 2 | 1 | 11 | 1 | 5 | 13.00 | 1.95 | 11.31 | 7 | 2.85 | 0.41 | 2.38 |
| 2 | 1 | 11 | 1 | 6 | 11.30 | 1.90 | 6.68  | 3 | 0.88 | 0.29 | 2.60 |

|   |   |    |   |   |       |      |       |    |      |      |      |
|---|---|----|---|---|-------|------|-------|----|------|------|------|
| 2 | 1 | 11 | 1 | 7 | 11.30 | 2.00 | 9.51  | 4  | 2.40 | 0.60 | 2.60 |
| 2 | 1 | 11 | 1 | 8 | 11.00 | 1.85 | 7.25  | 4  | 1.87 | 0.47 | 2.11 |
| 2 | 1 | 11 | 2 | 1 | 13.20 | 1.90 | 10.35 | 4  | 1.11 | 0.28 | 2.98 |
| 2 | 1 | 11 | 2 | 2 | 9.50  | 2.05 | 10.25 | 4  | 2.61 | 0.65 | 4.49 |
| 2 | 1 | 11 | 2 | 3 | 10.80 | 1.95 | 6.01  | 2  | 0.78 | 0.39 | 2.92 |
| 2 | 1 | 11 | 2 | 4 | 6.60  | 1.90 | 8.62  | 3  | 2.46 | 0.82 | 3.57 |
| 2 | 1 | 11 | 2 | 5 | 9.20  | 1.95 | 7.82  | 2  | 1.17 | 0.59 | 2.42 |
| 2 | 1 | 11 | 2 | 6 | 6.90  | 2.00 | 6.00  | 2  | 1.18 | 0.59 | 3.24 |
| 2 | 1 | 11 | 2 | 7 | 6.00  | 1.85 | 7.12  | 2  | 1.21 | 0.61 | 3.14 |
| 2 | 1 | 11 | 2 | 8 | 8.00  | 1.80 | 7.17  | 5  | 2.24 | 0.45 | 2.94 |
| 2 | 1 | 11 | 3 | 1 | 10.00 | 2.00 | 7.76  | 4  | 1.84 | 0.46 | 3.13 |
| 2 | 1 | 11 | 3 | 2 | 10.00 | 1.90 | 6.59  | 3  | 1.82 | 0.61 | 2.58 |
| 2 | 1 | 11 | 3 | 3 | 10.00 | 1.95 | 8.61  | 3  | 1.17 | 0.39 | 4.21 |
| 2 | 1 | 11 | 3 | 4 | 9.40  | 1.80 | 7.23  | 3  | 1.98 | 0.66 | 2.76 |
| 2 | 1 | 11 | 3 | 5 | 11.00 | 2.10 | 11.68 | 4  | 3.16 | 0.79 | 3.51 |
| 2 | 1 | 11 | 3 | 6 | 11.80 | 1.95 | 11.27 | 6  | 3.35 | 0.56 | 4.28 |
| 2 | 1 | 11 | 3 | 7 | 7.30  | 2.10 | 7.01  | 3  | 2.05 | 0.68 | 3.15 |
| 2 | 1 | 11 | 3 | 8 | 6.30  | 1.85 | 5.00  | 2  | 0.80 | 0.04 | 0.96 |
| 2 | 1 | 8  | 1 | 1 | 13.30 | 1.75 | 16.72 | 11 | 7.16 | 0.65 | 2.45 |
| 2 | 1 | 8  | 1 | 2 | 12.40 | 1.90 | 15.90 | 11 | 8.03 | 0.73 | 1.99 |
| 2 | 1 | 8  | 1 | 3 | 15.40 | 1.80 | 16.12 | 13 | 7.91 | 0.61 | 2.00 |
| 2 | 1 | 8  | 1 | 4 | 12.90 | 1.53 | 10.80 | 8  | 4.13 | 0.52 | 1.96 |
| 2 | 1 | 8  | 1 | 5 | 12.00 | 1.85 | 7.81  | 4  | 2.62 | 0.66 | 1.53 |
| 2 | 1 | 8  | 1 | 6 | 12.00 | 1.70 | 10.67 | 7  | 4.39 | 0.63 | 1.07 |
| 2 | 1 | 8  | 1 | 7 | 10.50 | 1.80 | 10.03 | 7  | 4.68 | 0.67 | 1.33 |
| 2 | 1 | 8  | 1 | 8 | 11.70 | 1.50 | 7.76  | 4  | 2.23 | 0.56 | 0.89 |
| 2 | 1 | 8  | 2 | 1 | 10.70 | 1.70 | 15.46 | 12 | 5.32 | 0.44 | 4.87 |
| 2 | 1 | 8  | 2 | 2 | 10.80 | 1.75 | 11.68 | 8  | 3.91 | 0.49 | 3.90 |
| 2 | 1 | 8  | 2 | 3 | 11.80 | 1.85 | 13.42 | 10 | 4.91 | 0.49 | 3.99 |
| 2 | 1 | 8  | 2 | 4 | 12.20 | 1.85 | 11.60 | 8  | 3.21 | 0.40 | 4.62 |
| 2 | 1 | 8  | 2 | 5 | 12.20 | 1.95 | 15.01 | 10 | 4.90 | 0.49 | 5.23 |
| 2 | 1 | 8  | 2 | 6 | 10.50 | 1.60 | 9.01  | 7  | 2.40 | 0.34 | 2.95 |
| 2 | 1 | 8  | 2 | 7 | 11.30 | 1.60 | 6.88  | 3  | 1.42 | 0.47 | 2.84 |
| 2 | 1 | 8  | 2 | 8 | 9.00  | 1.65 | 6.92  | 5  | 2.15 | 0.43 | 2.26 |
| 2 | 1 | 8  | 3 | 1 | 14.90 | 1.75 | 14.28 | 10 | 4.42 | 0.44 | 4.50 |
| 2 | 1 | 8  | 3 | 2 | 10.30 | 1.75 | 9.40  | 8  | 3.37 | 0.42 | 3.09 |

|   |   |    |   |   |       |      |       |   |      |      |       |
|---|---|----|---|---|-------|------|-------|---|------|------|-------|
| 2 | 1 | 8  | 3 | 3 | 11.50 | 1.65 | 8.04  | 6 | 2.45 | 0.41 | 2.87  |
| 2 | 1 | 8  | 3 | 4 | 10.50 | 1.80 | 10.05 | 7 | 3.35 | 0.48 | 4.04  |
| 2 | 1 | 8  | 3 | 5 | 14.10 | 1.65 | 9.28  | 7 | 2.80 | 0.40 | 3.34  |
| 2 | 1 | 8  | 3 | 6 | 9.30  | 1.55 | 6.30  | 4 | 1.60 | 0.40 | 2.48  |
| 2 | 1 | 8  | 3 | 7 | 9.20  | 1.60 | 8.23  | 6 | 2.35 | 0.39 | 3.25  |
| 2 | 1 | 8  | 3 | 8 | 10.00 | 1.75 | 9.04  | 7 | 2.89 | 0.41 | 3.63  |
| 2 | 1 | 20 | 1 | 1 | 10.10 | 1.85 | 7.82  | 4 | 2.28 | 0.57 | 3.33  |
| 2 | 1 | 20 | 1 | 2 | 11.70 | 1.90 | 11.59 | 7 | 3.70 | 0.53 | 4.95  |
| 2 | 1 | 20 | 1 | 3 | 10.60 | 1.75 | 5.63  | 2 | 0.36 | 0.18 | 3.15  |
| 2 | 1 | 20 | 1 | 4 | 7.50  | 1.95 | 6.73  | 4 | 2.10 | 0.53 | 2.85  |
| 2 | 1 | 20 | 1 | 5 | 7.50  | 1.95 | 7.84  | 4 | 2.61 | 0.65 | 3.19  |
| 2 | 1 | 20 | 1 | 6 | 7.10  | 1.75 | 7.01  | 3 | 1.77 | 0.59 | 3.58  |
| 2 | 1 | 20 | 1 | 7 | 7.40  | 1.85 | 6.02  | 3 | 2.44 | 0.81 | 2.19  |
| 2 | 1 | 20 | 1 | 8 | 8.40  | 1.70 | 6.60  | 3 | 1.86 | 0.62 | 2.97  |
| 2 | 1 | 20 | 2 | 1 | 14.30 | 2.20 | 15.21 | 4 | 2.75 | 0.69 | 5.84  |
| 2 | 1 | 20 | 2 | 2 | 14.70 | 2.20 | 18.42 | 8 | 3.48 | 0.44 | 6.68  |
| 2 | 1 | 20 | 2 | 3 | 11.70 | 2.25 | 16.55 | 6 | 3.97 | 0.66 | 7.19  |
| 2 | 1 | 20 | 2 | 4 | 10.40 | 2.05 | 11.23 | 3 | 2.06 | 0.69 | 5.50  |
| 2 | 1 | 20 | 2 | 5 | 9.00  | 1.95 | 7.11  | 4 | 1.83 | 0.46 | 2.99  |
| 2 | 1 | 20 | 2 | 6 | 8.20  | 1.80 | 8.00  | 4 | 2.94 | 0.74 | 3.05  |
| 2 | 1 | 20 | 2 | 7 | 9.90  | 1.85 | 7.34  | 3 | 0.76 | 0.25 | 3.84  |
| 2 | 1 | 20 | 2 | 8 | 6.90  | 1.95 | 6.54  | 3 | 1.84 | 0.61 | 2.84  |
| 2 | 1 | 20 | 3 | 1 | 13.70 | 2.05 | 14.44 | 8 | 3.25 | 0.41 | 6.36  |
| 2 | 1 | 20 | 3 | 2 | 13.60 | 1.90 | 13.14 | 9 | 4.22 | 0.47 | 5.44  |
| 2 | 1 | 20 | 3 | 3 | 8.10  | 1.80 | 6.65  | 4 | 1.96 | 0.49 | 3.13  |
| 2 | 1 | 20 | 3 | 4 | 8.40  | 1.55 | 6.00  | 3 | 1.32 | 0.44 | 2.85  |
| 2 | 1 | 20 | 3 | 5 | 9.50  | 1.85 | 6.30  | 4 | 1.16 | 0.29 | 3.45  |
| 2 | 1 | 20 | 3 | 6 | 7.90  | 1.80 | 5.60  | 3 | 1.42 | 0.47 | 2.15  |
| 2 | 1 | 20 | 3 | 7 | 10.20 | 1.90 | 8.00  | 4 | 1.70 | 0.43 | 3.76  |
| 2 | 1 | 20 | 3 | 8 | 8.20  | 1.75 | 4.92  | 3 | 1.08 | 0.36 | 2.43  |
| 2 | 1 | 7  | 1 | 1 | 9.60  | 1.85 | 10.10 | 5 | 1.26 | 0.25 | 5.16  |
| 2 | 1 | 7  | 1 | 2 | 9.10  | 1.68 | 9.74  | 4 | 2.51 | 0.63 | 3.96  |
| 2 | 1 | 7  | 1 | 3 | 16.40 | 2.14 | 22.37 | 8 | 5.26 | 0.66 | 10.31 |
| 2 | 1 | 7  | 1 | 4 | 13.20 | 1.97 | 14.59 | 4 | 2.68 | 0.67 | 6.91  |
| 2 | 1 | 7  | 1 | 5 | 12.40 | 1.92 | 13.98 | 6 | 3.48 | 0.58 | 5.09  |
| 2 | 1 | 7  | 1 | 6 | 14.50 | 1.62 | 11.59 | 4 | 2.41 | 0.60 | 5.33  |

|   |   |    |   |   |       |      |       |    |      |      |       |
|---|---|----|---|---|-------|------|-------|----|------|------|-------|
| 2 | 1 | 7  | 1 | 7 | 14.10 | 1.99 | 14.10 | 4  | 1.51 | 0.38 | 7.04  |
| 2 | 1 | 7  | 1 | 8 | 5.00  | 1.61 | 3.96  | 1  | 0.50 | 0.50 | 2.06  |
| 2 | 1 | 7  | 2 | 1 | 18.20 | 1.92 | 26.10 | 9  | 6.35 | 0.71 | 11.67 |
| 2 | 1 | 7  | 2 | 2 | 16.30 | 1.96 | 24.00 | 9  | 5.75 | 0.64 | 9.26  |
| 2 | 1 | 7  | 2 | 3 | 16.10 | 1.86 | 18.44 | 6  | 2.29 | 0.38 | 9.09  |
| 2 | 1 | 7  | 2 | 4 | 17.00 | 2.05 | 21.17 | 8  | 3.74 | 0.47 | 11.25 |
| 2 | 1 | 7  | 2 | 5 | 14.60 | 2.06 | 19.43 | 7  | 4.59 | 0.66 | 8.64  |
| 2 | 1 | 7  | 2 | 6 | 14.90 | 1.95 | 19.77 | 9  | 5.30 | 0.59 | 7.79  |
| 2 | 1 | 7  | 2 | 7 | 15.10 | 2.00 | 17.18 | 6  | 3.03 | 0.51 | 8.56  |
| 2 | 1 | 7  | 2 | 8 | 13.20 | 1.96 | 13.81 | 4  | 1.54 | 0.39 | 7.76  |
| 2 | 1 | 7  | 3 | 1 | 18.60 | 2.18 | 25.65 | 14 | 8.91 | 0.64 | 10.48 |
| 2 | 1 | 7  | 3 | 2 | 20.70 | 2.30 | 31.21 | 10 | 6.62 | 0.66 | 13.74 |
| 2 | 1 | 7  | 3 | 3 | 19.90 | 2.00 | 28.96 | 12 | 6.94 | 0.58 | 12.53 |
| 2 | 1 | 7  | 3 | 4 | 20.10 | 2.05 | 24.19 | 11 | 6.35 | 0.58 | 9.77  |
| 2 | 1 | 7  | 3 | 5 | 16.50 | 1.97 | 23.16 | 9  | 5.73 | 0.64 | 9.87  |
| 2 | 1 | 7  | 3 | 6 | 13.60 | 2.05 | 20.02 | 8  | 5.68 | 0.71 | 8.26  |
| 2 | 1 | 7  | 3 | 7 | 15.00 | 2.07 | 19.82 | 10 | 6.09 | 0.61 | 8.29  |
| 2 | 1 | 7  | 3 | 8 | 8.00  | 1.42 | 10.81 | 5  | 3.12 | 0.62 | 5.01  |
| 2 | 1 | 10 | 1 | 1 | 12.80 | 1.75 | 11.09 | 8  | 2.65 | 0.33 | 3.75  |
| 2 | 1 | 10 | 1 | 2 | 13.50 | 1.55 | 10.46 | 10 | 1.93 | 0.19 | 3.62  |
| 2 | 1 | 10 | 1 | 3 | 10.30 | 1.60 | 9.60  | 7  | 4.00 | 0.57 | 2.76  |
| 2 | 1 | 10 | 1 | 4 | 11.80 | 1.75 | 10.81 | 6  | 3.93 | 0.66 | 3.34  |
| 2 | 1 | 10 | 1 | 5 | 9.30  | 1.80 | 8.30  | 5  | 1.70 | 0.34 | 3.24  |
| 2 | 1 | 10 | 1 | 6 | 11.30 | 1.55 | 7.84  | 4  | 0.89 | 0.22 | 3.66  |
| 2 | 1 | 10 | 1 | 7 | 9.00  | 1.50 | 6.25  | 5  | 1.39 | 0.28 | 2.57  |
| 2 | 1 | 10 | 1 | 8 | 8.20  | 1.80 | 7.58  | 3  | 1.81 | 0.60 | 2.85  |
| 2 | 1 | 10 | 2 | 1 | 12.90 | 1.95 | 16.39 | 11 | 5.80 | 0.53 | 4.73  |
| 2 | 1 | 10 | 2 | 2 | 14.80 | 1.80 | 17.19 | 8  | 6.30 | 0.79 | 5.09  |
| 2 | 1 | 10 | 2 | 3 | 14.10 | 1.95 | 13.68 | 7  | 1.90 | 0.27 | 6.10  |
| 2 | 1 | 10 | 2 | 4 | 14.60 | 1.85 | 18.31 | 10 | 7.55 | 0.76 | 5.55  |
| 2 | 1 | 10 | 2 | 5 | 11.30 | 1.95 | 12.74 | 9  | 3.49 | 0.39 | 4.67  |
| 2 | 1 | 10 | 2 | 6 | 13.60 | 1.85 | 14.01 | 8  | 3.01 | 0.38 | 5.97  |
| 2 | 1 | 10 | 2 | 7 | 14.60 | 1.90 | 15.67 | 11 | 4.10 | 0.37 | 6.17  |
| 2 | 1 | 10 | 2 | 8 | 13.00 | 1.80 | 15.30 | 9  | 5.80 | 0.64 | 4.70  |
| 2 | 1 | 10 | 3 | 1 | 14.80 | 1.80 | 14.04 | 10 | 2.70 | 0.27 | 5.49  |
| 2 | 1 | 10 | 3 | 2 | 12.50 | 1.60 | 10.83 | 7  | 1.75 | 0.25 | 3.82  |



|   |   |    |   |   |       |      |       |    |      |      |       |
|---|---|----|---|---|-------|------|-------|----|------|------|-------|
| 2 | 1 | 10 | 3 | 3 | 13.30 | 1.80 | 13.24 | 7  | 5.04 | 0.72 | 4.28  |
| 2 | 1 | 10 | 3 | 4 | 17.50 | 1.75 | 15.47 | 10 | 2.50 | 0.25 | 6.17  |
| 2 | 1 | 10 | 3 | 5 | 14.70 | 1.70 | 10.95 | 6  | 1.75 | 0.29 | 2.74  |
| 2 | 1 | 10 | 3 | 6 | 13.70 | 1.70 | 10.38 | 6  | 1.87 | 0.31 | 4.67  |
| 2 | 1 | 10 | 3 | 7 | 10.80 | 1.60 | 6.45  | 3  | 0.94 | 0.31 | 3.61  |
| 2 | 1 | 10 | 3 | 8 | 11.00 | 1.75 | 10.87 | 6  | 3.56 | 0.59 | 3.27  |
| 2 | 2 | 9  | 1 | 1 | 7.20  | 1.50 | 6.25  | 3  | 1.80 | 0.60 | 1.57  |
| 2 | 2 | 9  | 1 | 2 | 6.00  | 1.45 | 5.28  | 3  | 1.84 | 0.61 | 1.66  |
| 2 | 2 | 9  | 1 | 3 | 6.20  | 1.25 | 7.63  | 5  | 2.58 | 0.52 | 2.07  |
| 2 | 2 | 9  | 1 | 4 | 6.70  | 1.50 | 7.00  | 4  | 2.34 | 0.59 | 1.92  |
| 2 | 2 | 9  | 1 | 5 | 9.00  | 1.20 | 6.87  | 5  | 2.02 | 0.40 | 1.89  |
| 2 | 2 | 9  | 1 | 6 | 10.00 | 1.40 | 10.22 | 7  | 3.65 | 0.52 | 3.06  |
| 2 | 2 | 9  | 1 | 7 | 9.60  | 1.36 | 8.54  | 4  | 2.44 | 0.61 | 2.59  |
| 2 | 2 | 9  | 1 | 8 | 9.80  | 1.35 | 8.05  | 5  | 2.59 | 0.52 | 2.10  |
| 2 | 2 | 9  | 2 | 1 | 8.20  | 1.42 | 7.88  | 4  | 2.07 | 0.52 | 2.81  |
| 2 | 2 | 9  | 2 | 2 | 10.40 | 1.25 | 7.60  | 5  | 1.57 | 0.31 | 2.33  |
| 2 | 2 | 9  | 2 | 3 | 11.00 | 1.45 | 12.27 | 9  | 4.81 | 0.53 | 3.48  |
| 2 | 2 | 9  | 2 | 4 | 8.00  | 1.50 | 7.88  | 5  | 3.18 | 0.64 | 2.67  |
| 2 | 2 | 9  | 2 | 5 | 10.20 | 1.40 | 8.61  | 5  | 2.42 | 0.48 | 4.48  |
| 2 | 2 | 9  | 2 | 6 | 9.60  | 1.50 | 11.73 | 7  | 3.95 | 0.56 | 0.87  |
| 2 | 2 | 9  | 2 | 7 | 8.00  | 1.52 | 10.65 | 7  | 3.40 | 0.49 | 2.69  |
| 2 | 2 | 9  | 2 | 8 | 10.00 | 1.40 | 8.50  | 6  | 2.60 | 0.43 | 1.75  |
| 2 | 2 | 9  | 3 | 1 | 13.00 | 1.56 | 17.50 | 8  | 5.03 | 0.63 | 5.44  |
| 2 | 2 | 9  | 3 | 2 | 10.50 | 1.55 | 11.20 | 6  | 3.52 | 0.59 | 3.81  |
| 2 | 2 | 9  | 3 | 3 | 12.10 | 1.40 | 13.56 | 7  | 4.26 | 0.61 | 3.98  |
| 2 | 2 | 9  | 3 | 4 | 14.00 | 1.60 | 15.77 | 8  | 4.55 | 0.57 | 4.22  |
| 2 | 2 | 9  | 3 | 5 | 10.00 | 1.55 | 13.16 | 9  | 5.47 | 0.61 | 4.05  |
| 2 | 2 | 9  | 3 | 6 | 11.00 | 1.40 | 16.28 | 9  | 5.00 | 0.56 | 4.83  |
| 2 | 2 | 9  | 3 | 7 | 11.10 | 1.50 | 12.32 | 3  | 1.55 | 0.52 | 1.92  |
| 2 | 2 | 9  | 3 | 8 | 8.00  | 1.45 | 6.91  | 6  | 3.96 | 0.66 | 3.78  |
| 2 | 2 | 4  | 1 | 1 | 13.40 | 1.75 | 20.10 | 10 | 4.27 | 0.43 | 7.18  |
| 2 | 2 | 4  | 1 | 2 | 14.10 | 1.60 | 23.28 | 11 | 4.30 | 0.39 | 10.62 |
| 2 | 2 | 4  | 1 | 3 | 14.30 | 1.70 | 15.71 | 10 | 2.85 | 0.29 | 5.63  |
| 2 | 2 | 4  | 1 | 4 | 8.20  | 1.58 | 11.72 | 5  | 3.32 | 0.66 | 4.30  |
| 2 | 2 | 4  | 1 | 5 | 11.80 | 1.35 | 11.99 | 6  | 2.20 | 0.37 | 3.30  |
| 2 | 2 | 4  | 1 | 6 | 10.40 | 1.27 | 10.58 | 6  | 1.56 | 0.26 | 3.96  |

|   |   |   |   |   |       |      |       |    |      |      |      |
|---|---|---|---|---|-------|------|-------|----|------|------|------|
| 2 | 2 | 4 | 1 | 7 | 9.20  | 1.58 | 11.73 | 6  | 2.56 | 0.43 | 4.50 |
| 2 | 2 | 4 | 1 | 8 | 9.00  | 1.56 | 10.08 | 5  | 1.98 | 0.40 | 4.30 |
| 2 | 2 | 4 | 2 | 1 | 15.50 | 1.56 | 13.33 | 6  | 1.65 | 0.28 | 5.63 |
| 2 | 2 | 4 | 2 | 2 | 13.00 | 1.65 | 12.98 | 5  | 1.57 | 0.31 | 5.75 |
| 2 | 2 | 4 | 2 | 3 | 14.40 | 1.65 | 16.89 | 7  | 2.06 | 0.29 | 7.89 |
| 2 | 2 | 4 | 2 | 4 | 11.80 | 1.90 | 15.57 | 8  | 3.08 | 0.39 | 6.70 |
| 2 | 2 | 4 | 2 | 5 | 13.50 | 1.45 | 10.28 | 5  | 1.66 | 0.33 | 5.47 |
| 2 | 2 | 4 | 2 | 6 | 13.00 | 1.50 | 14.99 | 9  | 4.35 | 0.48 | 5.52 |
| 2 | 2 | 4 | 2 | 7 | 13.00 | 1.55 | 19.32 | 12 | 4.11 | 0.34 | 8.30 |
| 2 | 2 | 4 | 2 | 8 | 9.00  | 1.60 | 9.43  | 4  | 1.20 | 0.30 | 4.20 |
| 2 | 2 | 4 | 3 | 1 | 16.40 | 1.70 | 21.96 | 12 | 6.39 | 0.53 | 7.85 |
| 2 | 2 | 4 | 3 | 2 | 13.00 | 1.75 | 20.46 | 10 | 5.56 | 0.56 | 6.58 |
| 2 | 2 | 4 | 3 | 3 | 13.20 | 1.40 | 12.98 | 9  | 3.22 | 0.36 | 4.62 |
| 2 | 2 | 4 | 3 | 4 | 11.40 | 1.51 | 15.40 | 7  | 3.75 | 0.54 | 5.70 |
| 2 | 2 | 4 | 3 | 5 | 12.40 | 1.55 | 18.42 | 9  | 5.25 | 0.58 | 7.20 |
| 2 | 2 | 4 | 3 | 6 | 18.40 | 1.95 | 28.97 | 16 | 8.68 | 0.54 | 9.36 |
| 2 | 2 | 4 | 3 | 7 | 15.40 | 1.76 | 24.28 | 12 | 6.52 | 0.54 | 8.85 |
| 2 | 2 | 4 | 3 | 8 | 13.40 | 1.75 | 19.96 | 12 | 6.89 | 0.57 | 6.68 |
| 2 | 2 | 3 | 1 | 1 | 9.56  | 1.76 | 14.57 | 8  | 3.21 | 0.40 | 6.24 |
| 2 | 2 | 3 | 1 | 2 | 7.00  | 1.50 | 8.86  | 3  | 1.45 | 0.48 | 3.91 |
| 2 | 2 | 3 | 1 | 3 | 9.00  | 1.70 | 13.38 | 7  | 2.93 | 0.42 | 5.17 |
| 2 | 2 | 3 | 1 | 4 | 10.20 | 1.86 | 16.54 | 5  | 2.50 | 0.50 | 5.94 |
| 2 | 2 | 3 | 1 | 5 | 7.00  | 1.76 | 12.77 | 7  | 3.28 | 0.47 | 5.07 |
| 2 | 2 | 3 | 1 | 6 | 7.10  | 1.75 | 8.64  | 5  | 1.74 | 0.35 | 2.82 |
| 2 | 2 | 3 | 1 | 7 | 5.00  | 1.75 | 8.17  | 4  | 1.62 | 0.41 | 3.57 |
| 2 | 2 | 3 | 1 | 8 | 5.50  | 1.70 | 5.91  | 3  | 1.06 | 0.35 | 2.86 |
| 2 | 2 | 3 | 2 | 1 | 10.00 | 1.95 | 15.62 | 7  | 2.31 | 0.33 | 6.63 |
| 2 | 2 | 3 | 2 | 2 | 10.50 | 1.90 | 16.24 | 9  | 2.43 | 0.27 | 5.40 |
| 2 | 2 | 3 | 2 | 3 | 7.00  | 1.65 | 9.08  | 3  | 1.70 | 0.57 | 4.02 |
| 2 | 2 | 3 | 2 | 4 | 6.00  | 1.37 | 6.76  | 1  | 0.34 | 0.34 | 4.48 |
| 2 | 2 | 3 | 2 | 5 | 5.00  | 1.62 | 6.64  | 2  | 0.69 | 0.35 | 2.46 |
| 2 | 2 | 3 | 2 | 6 | 6.40  | 1.82 | 10.04 | 4  | 1.78 | 0.45 | 4.37 |
| 2 | 2 | 3 | 2 | 7 | 6.80  | 1.80 | 10.49 | 5  | 2.12 | 0.42 | 3.50 |
| 2 | 2 | 3 | 2 | 8 | 6.00  | 1.70 | 7.32  | 3  | 0.98 | 0.33 | 3.51 |
| 2 | 2 | 3 | 3 | 1 | 5.50  | 1.46 | 4.88  | 1  | 0.23 | 0.23 | 2.30 |
| 2 | 2 | 3 | 3 | 2 | 6.20  | 1.75 | 8.79  | 4  | 2.21 | 0.55 | 3.26 |

|   |   |    |   |   |       |      |       |    |      |      |       |
|---|---|----|---|---|-------|------|-------|----|------|------|-------|
| 2 | 2 | 3  | 3 | 3 | 8.10  | 1.50 | 11.71 | 5  | 2.62 | 0.52 | 5.25  |
| 2 | 2 | 3  | 3 | 4 | 7.20  | 1.85 | 11.94 | 5  | 2.86 | 0.57 | 4.79  |
| 2 | 2 | 3  | 3 | 5 | 7.00  | 1.65 | 7.08  | 3  | 1.16 | 0.39 | 3.60  |
| 2 | 2 | 3  | 3 | 6 | 6.50  | 1.80 | 9.56  | 5  | 3.28 | 0.66 | 3.02  |
| 2 | 2 | 3  | 3 | 7 | 6.00  | 1.47 | 8.01  | 4  | 1.98 | 0.50 | 2.28  |
| 2 | 2 | 3  | 3 | 8 | 6.00  | 1.48 | 5.30  | 2  | 0.63 | 0.32 | 2.43  |
| 2 | 2 | 16 | 1 | 1 | 10.20 | 1.75 | 15.51 | 6  | 2.48 | 0.41 | 6.76  |
| 2 | 2 | 16 | 1 | 2 | 11.16 | 1.85 | 15.81 | 6  | 1.94 | 0.32 | 2.28  |
| 2 | 2 | 16 | 1 | 3 | 10.00 | 1.55 | 11.23 | 5  | 1.58 | 0.32 | 5.22  |
| 2 | 2 | 16 | 1 | 4 | 12.00 | 1.60 | 21.70 | 11 | 5.11 | 0.46 | 8.09  |
| 2 | 2 | 16 | 1 | 5 | 15.70 | 1.75 | 26.44 | 12 | 5.51 | 0.46 | 11.55 |
| 2 | 2 | 16 | 1 | 6 | 13.00 | 1.35 | 16.89 | 12 | 3.92 | 0.33 | 5.92  |
| 2 | 2 | 16 | 1 | 7 | 7.00  | 1.75 | 10.65 | 4  | 1.48 | 0.37 | 4.90  |
| 2 | 2 | 16 | 1 | 8 | 12.80 | 1.66 | 16.45 | 5  | 2.05 | 0.41 | 7.40  |
| 2 | 2 | 16 | 2 | 1 | 10.50 | 1.65 | 16.46 | 6  | 2.71 | 0.45 | 6.70  |
| 2 | 2 | 16 | 2 | 2 | 11.00 | 1.70 | 19.85 | 5  | 1.49 | 0.30 | 11.14 |
| 2 | 2 | 16 | 2 | 3 | 11.20 | 1.70 | 19.80 | 8  | 3.44 | 0.43 | 10.23 |
| 2 | 2 | 16 | 2 | 4 | 10.00 | 1.80 | 16.16 | 7  | 2.30 | 0.33 | 8.45  |
| 2 | 2 | 16 | 2 | 5 | 8.00  | 1.70 | 10.55 | 4  | 1.07 | 0.27 | 6.07  |
| 2 | 2 | 16 | 2 | 6 | 13.00 | 1.85 | 15.79 | 7  | 1.68 | 0.24 | 8.57  |
| 2 | 2 | 16 | 2 | 7 | 12.50 | 1.75 | 23.17 | 8  | 4.18 | 0.52 | 9.48  |
| 2 | 2 | 16 | 2 | 8 | 13.00 | 1.65 | 13.14 | 6  | 2.61 | 0.44 | 7.07  |
| 2 | 2 | 16 | 3 | 1 | 16.00 | 1.75 | 26.68 | 6  | 3.80 | 0.63 | 3.19  |
| 2 | 2 | 16 | 3 | 2 | 15.10 | 1.85 | 17.55 | 6  | 3.41 | 0.57 | 8.47  |
| 2 | 2 | 16 | 3 | 3 | 15.10 | 1.86 | 23.36 | 6  | 1.25 | 0.21 | 7.43  |
| 2 | 2 | 16 | 3 | 4 | 11.80 | 1.75 | 12.94 | 2  | 1.00 | 0.50 | 9.00  |
| 2 | 2 | 16 | 3 | 5 | 10.80 | 1.65 | 13.33 | 10 | 6.27 | 0.63 | 10.25 |
| 2 | 2 | 16 | 3 | 6 | 11.40 | 1.78 | 12.32 | 7  | 3.13 | 0.45 | 14.90 |
| 2 | 2 | 16 | 3 | 7 | 8.00  | 1.70 | 10.51 | 5  | 1.92 | 0.38 | 10.50 |
| 2 | 2 | 16 | 3 | 8 | 7.00  | 1.65 | 8.86  | 3  | 1.17 | 0.39 | 4.60  |
| 2 | 2 | 27 | 1 | 1 | 10.00 | 1.65 | 18.98 | 8  | 6.42 | 0.80 | 7.20  |
| 2 | 2 | 27 | 1 | 2 | 11.80 | 1.65 | 18.61 | 8  | 4.33 | 0.54 | 7.78  |
| 2 | 2 | 27 | 1 | 3 | 12.00 | 1.70 | 20.57 | 9  | 5.40 | 0.60 | 7.47  |
| 2 | 2 | 27 | 1 | 4 | 10.20 | 1.56 | 14.11 | 6  | 3.20 | 0.53 | 6.49  |
| 2 | 2 | 27 | 1 | 5 | 12.40 | 1.70 | 19.22 | 8  | 5.35 | 0.67 | 7.48  |
| 2 | 2 | 27 | 1 | 6 | 11.00 | 1.73 | 13.06 | 3  | 1.85 | 0.62 | 4.15  |

|   |   |    |   |   |       |      |       |    |      |      |       |
|---|---|----|---|---|-------|------|-------|----|------|------|-------|
| 2 | 2 | 27 | 1 | 7 | 11.00 | 1.65 | 16.39 | 8  | 4.60 | 0.58 | 4.15  |
| 2 | 2 | 27 | 1 | 8 | 9.40  | 1.65 | 8.00  | 4  | 2.18 | 0.55 | 3.15  |
| 2 | 2 | 27 | 2 | 1 | 13.00 | 1.53 | 15.89 | 8  | 2.42 | 0.30 | 7.20  |
| 2 | 2 | 27 | 2 | 2 | 11.50 | 1.70 | 20.92 | 8  | 5.33 | 0.67 | 7.78  |
| 2 | 2 | 27 | 2 | 3 | 14.00 | 1.52 | 19.91 | 12 | 5.40 | 0.45 | 7.17  |
| 2 | 2 | 27 | 2 | 4 | 13.80 | 1.53 | 16.81 | 8  | 2.20 | 0.28 | 6.49  |
| 2 | 2 | 27 | 2 | 5 | 12.00 | 1.81 | 15.99 | 8  | 2.35 | 0.29 | 6.48  |
| 2 | 2 | 27 | 2 | 6 | 15.00 | 1.83 | 26.38 | 13 | 7.46 | 0.57 | 8.55  |
| 2 | 2 | 27 | 2 | 7 | 11.00 | 1.51 | 13.79 | 8  | 2.23 | 0.28 | 7.58  |
| 2 | 2 | 27 | 2 | 8 | 12.00 | 1.76 | 16.59 | 8  | 2.01 | 0.25 | 6.62  |
| 2 | 2 | 27 | 3 | 1 | 13.10 | 1.76 | 22.11 | 9  | 2.71 | 0.30 | 5.86  |
| 2 | 2 | 27 | 3 | 2 | 14.50 | 1.77 | 19.46 | 10 | 6.35 | 0.64 | 6.94  |
| 2 | 2 | 27 | 3 | 3 | 13.10 | 1.53 | 15.26 | 3  | 1.04 | 0.35 | 8.24  |
| 2 | 2 | 27 | 3 | 4 | 14.00 | 1.80 | 24.18 | 7  | 4.68 | 0.67 | 10.10 |
| 2 | 2 | 27 | 3 | 5 | 11.00 | 1.57 | 13.77 | 3  | 1.70 | 0.57 | 6.99  |
| 2 | 2 | 27 | 3 | 6 | 14.00 | 1.63 | 24.24 | 9  | 4.68 | 0.52 | 6.92  |
| 2 | 2 | 27 | 3 | 7 | 13.00 | 1.62 | 17.00 | 7  | 2.71 | 0.39 | 10.36 |
| 2 | 2 | 27 | 3 | 8 | 10.50 | 1.55 | 7.87  | 5  | 1.66 | 0.33 | 4.76  |
| 2 | 2 | 18 | 1 | 1 | 6.00  | 1.56 | 8.87  | 4  | 2.86 | 0.72 | 3.85  |
| 2 | 2 | 18 | 1 | 2 | 7.20  | 1.43 | 8.45  | 3  | 1.68 | 0.56 | 3.99  |
| 2 | 2 | 18 | 1 | 3 | 9.50  | 1.48 | 11.57 | 5  | 3.23 | 0.65 | 5.14  |
| 2 | 2 | 18 | 1 | 4 | 10.00 | 1.80 | 14.61 | 6  | 4.45 | 0.74 | 5.80  |
| 2 | 2 | 18 | 1 | 5 | 11.00 | 1.63 | 12.97 | 5  | 3.52 | 0.70 | 5.26  |
| 2 | 2 | 18 | 1 | 6 | 9.00  | 1.43 | 11.73 | 4  | 2.96 | 0.74 | 5.13  |
| 2 | 2 | 18 | 1 | 7 | 9.00  | 1.61 | 9.46  | 4  | 2.47 | 0.62 | 5.04  |
| 2 | 2 | 18 | 1 | 8 | 7.00  | 1.60 | 7.65  | 3  | 2.38 | 0.79 | 2.70  |
| 2 | 2 | 18 | 2 | 1 | 7.00  | 1.65 | 9.76  | 4  | 3.88 | 0.97 | 3.92  |
| 2 | 2 | 18 | 2 | 2 | 9.40  | 1.60 | 10.99 | 4  | 2.94 | 0.74 | 4.24  |
| 2 | 2 | 18 | 2 | 3 | 8.00  | 1.56 | 9.52  | 4  | 3.54 | 0.89 | 3.53  |
| 2 | 2 | 18 | 2 | 4 | 8.10  | 1.46 | 9.62  | 4  | 2.95 | 0.74 | 3.79  |
| 2 | 2 | 18 | 2 | 5 | 9.10  | 1.56 | 8.99  | 3  | 2.15 | 0.72 | 2.54  |
| 2 | 2 | 18 | 2 | 6 | 9.10  | 1.48 | 9.75  | 4  | 2.60 | 0.65 | 4.37  |
| 2 | 2 | 18 | 2 | 7 | 7.00  | 1.59 | 8.93  | 3  | 2.86 | 0.95 | 3.58  |
| 2 | 2 | 18 | 2 | 8 | 6.00  | 1.65 | 7.78  | 3  | 2.40 | 0.80 | 2.96  |
| 2 | 2 | 18 | 3 | 1 | 9.10  | 1.32 | 10.63 | 4  | 2.75 | 0.69 | 4.63  |
| 2 | 2 | 18 | 3 | 2 | 11.00 | 1.32 | 11.13 | 3  | 1.97 | 0.66 | 5.48  |

|   |   |    |   |   |       |      |       |    |       |      |       |
|---|---|----|---|---|-------|------|-------|----|-------|------|-------|
| 2 | 2 | 18 | 3 | 3 | 10.10 | 1.70 | 11.83 | 4  | 2.83  | 0.71 | 5.18  |
| 2 | 2 | 18 | 3 | 4 | 10.80 | 1.58 | 12.87 | 5  | 4.06  | 0.81 | 5.37  |
| 2 | 2 | 18 | 3 | 5 | 7.00  | 1.65 | 8.40  | 2  | 1.66  | 0.83 | 3.19  |
| 2 | 2 | 18 | 3 | 6 | 8.00  | 1.64 | 10.86 | 4  | 2.85  | 0.71 | 3.62  |
| 2 | 2 | 18 | 3 | 7 | 10.00 | 1.48 | 11.60 | 6  | 4.63  | 0.77 | 5.18  |
| 2 | 2 | 18 | 3 | 8 | 10.40 | 1.57 | 11.27 | 4  | 3.86  | 0.97 | 4.84  |
| 2 | 2 | 28 | 1 | 1 | 13.20 | 2.00 | 37.48 | 13 | 9.33  | 0.72 | 15.56 |
| 2 | 2 | 28 | 1 | 2 | 9.00  | 1.75 | 16.80 | 6  | 3.89  | 0.65 | 6.90  |
| 2 | 2 | 28 | 1 | 3 | 11.00 | 1.95 | 22.03 | 8  | 4.98  | 0.62 | 9.35  |
| 2 | 2 | 28 | 1 | 4 | 10.20 | 1.65 | 16.94 | 7  | 3.86  | 0.55 | 8.72  |
| 2 | 2 | 28 | 1 | 5 | 10.50 | 2.15 | 24.65 | 5  | 4.51  | 0.90 | 12.80 |
| 2 | 2 | 28 | 1 | 6 | 11.00 | 1.65 | 25.75 | 12 | 7.28  | 0.61 | 11.86 |
| 2 | 2 | 28 | 1 | 7 | 9.80  | 1.61 | 15.86 | 5  | 4.29  | 0.86 | 6.80  |
| 2 | 2 | 28 | 1 | 8 | 9.20  | 1.61 | 15.44 | 5  | 2.79  | 0.56 | 8.95  |
| 2 | 2 | 28 | 2 | 1 | 14.20 | 2.20 | 40.10 | 10 | 8.55  | 0.86 | 19.25 |
| 2 | 2 | 28 | 2 | 2 | 11.00 | 2.05 | 28.67 | 8  | 7.10  | 0.89 | 12.74 |
| 2 | 2 | 28 | 2 | 3 | 11.00 | 2.05 | 40.99 | 11 | 8.04  | 0.73 | 19.10 |
| 2 | 2 | 28 | 2 | 4 | 11.30 | 2.05 | 30.35 | 8  | 7.65  | 0.96 | 12.61 |
| 2 | 2 | 28 | 2 | 5 | 10.90 | 2.10 | 25.54 | 8  | 7.62  | 0.95 | 14.38 |
| 2 | 2 | 28 | 2 | 6 | 10.50 | 2.15 | 34.18 | 11 | 8.64  | 0.79 | 16.01 |
| 2 | 2 | 28 | 2 | 7 | 9.20  | 1.80 | 17.98 | 7  | 4.65  | 0.66 | 8.87  |
| 2 | 2 | 28 | 2 | 8 | 10.00 | 1.85 | 28.08 | 10 | 7.71  | 0.77 | 11.05 |
| 2 | 2 | 28 | 3 | 1 | 9.40  | 1.80 | 15.28 | 5  | 3.69  | 0.74 | 6.67  |
| 2 | 2 | 28 | 3 | 2 | 14.20 | 2.15 | 45.64 | 11 | 11.14 | 1.01 | 19.53 |
| 2 | 2 | 28 | 3 | 3 | 11.80 | 2.05 | 32.96 | 10 | 8.48  | 0.85 | 14.97 |
| 2 | 2 | 28 | 3 | 4 | 12.00 | 2.15 | 33.87 | 9  | 7.40  | 0.82 | 15.63 |
| 2 | 2 | 28 | 3 | 5 | 13.00 | 2.05 | 37.35 | 12 | 10.15 | 0.85 | 17.13 |
| 2 | 2 | 28 | 3 | 6 | 9.50  | 2.06 | 19.46 | 5  | 4.36  | 0.87 | 8.47  |
| 2 | 2 | 28 | 3 | 7 | 11.00 | 1.80 | 27.49 | 7  | 4.14  | 0.59 | 15.37 |
| 2 | 2 | 28 | 3 | 8 | 9.50  | 2.20 | 24.79 | 4  | 3.30  | 0.83 | 14.10 |
| 2 | 2 | 22 | 1 | 1 | 11.00 | 1.55 | 12.82 | 6  | 3.55  | 0.59 | 6.57  |
| 2 | 2 | 22 | 1 | 2 | 9.00  | 1.55 | 11.97 | 4  | 2.28  | 0.57 | 3.68  |
| 2 | 2 | 22 | 1 | 3 | 12.20 | 1.43 | 13.98 | 4  | 2.17  | 0.54 | 4.13  |
| 2 | 2 | 22 | 1 | 4 | 8.80  | 1.43 | 9.90  | 3  | 1.57  | 0.52 | 3.74  |
| 2 | 2 | 22 | 1 | 5 | 6.60  | 1.63 | 9.51  | 3  | 1.46  | 0.49 | 3.06  |
| 2 | 2 | 22 | 1 | 6 | 8.00  | 1.55 | 6.53  | 3  | 2.16  | 0.72 | 5.08  |

|   |   |    |   |   |       |      |       |       |      |      |       |
|---|---|----|---|---|-------|------|-------|-------|------|------|-------|
| 2 | 2 | 22 | 1 | 7 | 7.50  | 1.50 | 8.85  | 2     | 0.95 | 0.48 | 4.28  |
| 2 | 2 | 22 | 1 | 8 | 8.00  | 1.55 | 9.67  | 2     | 1.31 | 0.66 | 4.04  |
| 2 | 2 | 22 | 2 | 1 | 11.80 | 1.60 | 15.46 | 4     | 2.52 | 0.63 | 5.18  |
| 2 | 2 | 22 | 2 | 2 | 8.20  | 1.55 | 10.80 | 5     | 3.01 | 0.60 | 4.25  |
| 2 | 2 | 22 | 2 | 3 | 9.50  | 1.60 | 10.36 | 5     | 2.62 | 0.52 | 4.18  |
| 2 | 2 | 22 | 2 | 4 | 7.00  | 1.45 | 8.02  | 4     | 2.34 | 0.59 | 4.07  |
| 2 | 2 | 22 | 2 | 5 | 7.10  | 1.50 | 7.07  | 3     | 2.01 | 0.67 | 3.54  |
| 2 | 2 | 22 | 2 | 6 | 9.50  | 1.85 | 12.05 | 1     | 0.64 | 0.64 | 2.97  |
| 2 | 2 | 22 | 2 | 7 | 7.20  | 1.60 | 8.09  | 4     | 1.45 | 0.36 | 3.68  |
| 2 | 2 | 22 | 2 | 8 | 5.00  | 1.60 | 7.47  | 4     | 2.08 | 0.52 | 3.78  |
| 2 | 2 | 22 | 3 | 1 | 13.00 | 1.85 | 17.29 | 3     | 1.10 | 0.37 | 7.43  |
| 2 | 2 | 22 | 3 | 2 | 14.00 | 1.58 | 15.43 | 6     | 2.33 | 0.39 | 6.56  |
| 2 | 2 | 22 | 3 | 3 | 12.80 | 1.75 | 20.98 | 6     | 2.93 | 0.49 | 7.37  |
| 2 | 2 | 22 | 3 | 4 | 13.00 | 1.74 | 16.59 | 5     | 2.65 | 0.53 | 6.22  |
| 2 | 2 | 22 | 3 | 5 | 16.50 | 1.83 | 26.16 | 7     | 3.99 | 0.57 | 10.77 |
| 2 | 2 | 22 | 3 | 6 | 11.50 | 1.75 | 17.15 | 7     | 3.75 | 0.54 | 6.50  |
| 2 | 2 | 22 | 3 | 7 | 17.00 | 1.95 | 32.38 | 11    | 6.47 | 0.59 | 11.91 |
| 2 | 2 | 22 | 3 | 8 | 14.00 | 1.76 | 19.92 | 5     | 2.44 | 0.49 | 9.08  |
| 2 | 2 | 33 | 1 | 1 | 12.00 | 1.55 | 18.22 | 10    | 6.64 | 0.66 | 5.75  |
| 2 | 2 | 33 | 1 | 2 | 9.00  | 1.55 | 10.15 | 5     | 3.44 | 0.69 | 4.10  |
| 2 | 2 | 33 | 1 | 3 | 11.20 | 1.60 | 15.34 | 8     | 4.94 | 0.62 | 5.47  |
| 2 | 2 | 33 | 1 | 4 | 10.00 | 1.80 | 15.14 | 7     | 5.01 | 0.72 | 5.62  |
| 2 | 2 | 33 | 1 | 5 | 11.80 | 1.76 | 14.96 | 6     | 3.75 | 0.63 | 6.25  |
| 2 | 2 | 33 | 1 | 6 | 12.00 | 1.60 | 13.66 | 11    | 7.72 | 0.70 | 7.44  |
| 2 | 2 | 33 | 1 | 7 | 12.00 | 1.40 | 15.77 | 8     | 4.47 | 0.56 | 5.01  |
| 2 | 2 | 33 | 1 | 8 | 10.50 | 1.51 | 11.20 | 6     | 3.25 | 0.54 | 4.30  |
| 2 | 2 | 33 | 2 | 1 | 12.00 | 1.77 | 20.25 | 11.00 | 6.49 | 0.59 | 7.38  |
| 2 | 2 | 33 | 2 | 2 | 13.40 | 1.60 | 17.88 | 11.00 | 6.20 | 0.56 | 6.67  |
| 2 | 2 | 33 | 2 | 3 | 11.80 | 1.50 | 14.15 | 8     | 3.48 | 0.44 | 5.48  |
| 2 | 2 | 33 | 2 | 4 | 10.50 | 1.70 | 12.67 | 6     | 3.56 | 0.59 | 3.19  |
| 2 | 2 | 33 | 2 | 5 | 14.20 | 1.82 | 19.79 | 10    | 6.75 | 0.68 | 8.30  |
| 2 | 2 | 33 | 2 | 6 | 10.80 | 1.74 | 13.94 | 6     | 3.85 | 0.64 | 3.86  |
| 2 | 2 | 33 | 2 | 7 | 14.00 | 1.71 | 16.47 | 10    | 5.11 | 0.51 | 6.14  |
| 2 | 2 | 33 | 2 | 8 | 11.50 | 1.60 | 16.57 | 9     | 5.18 | 0.58 | 6.78  |
| 2 | 2 | 33 | 3 | 1 | 12.60 | 1.61 | 17.66 | 8     | 5.42 | 0.68 | 6.69  |
| 2 | 2 | 33 | 3 | 2 | 11.00 | 1.70 | 15.17 | 10    | 5.82 | 0.58 | 4.97  |

|   |   |    |   |   |       |      |       |    |      |      |       |
|---|---|----|---|---|-------|------|-------|----|------|------|-------|
| 2 | 2 | 33 | 3 | 3 | 12.10 | 1.60 | 18.42 | 10 | 7.84 | 0.78 | 6.11  |
| 2 | 2 | 33 | 3 | 4 | 11.50 | 1.56 | 14.22 | 6  | 3.91 | 0.65 | 5.33  |
| 2 | 2 | 33 | 3 | 5 | 11.00 | 1.75 | 13.54 | 6  | 4.72 | 0.79 | 6.72  |
| 2 | 2 | 33 | 3 | 6 | 10.50 | 1.70 | 14.72 | 8  | 5.27 | 0.66 | 5.08  |
| 2 | 2 | 33 | 3 | 7 | 11.50 | 1.75 | 15.47 | 6  | 4.21 | 0.70 | 6.84  |
| 2 | 2 | 33 | 3 | 8 | 11.20 | 1.60 | 11.45 | 7  | 4.26 | 0.61 | 3.74  |
| 2 | 2 | 26 | 1 | 1 | 13.00 | 1.55 | 17.53 | 1  | 0.74 | 0.74 | 4.49  |
| 2 | 2 | 26 | 1 | 2 | 12.00 | 1.50 | 14.38 | 4  | 2.65 | 0.66 | 5.47  |
| 2 | 2 | 26 | 1 | 3 | 15.50 | 1.35 | 17.38 | 4  | 2.54 | 0.64 | 3.89  |
| 2 | 2 | 26 | 1 | 4 | 13.00 | 1.45 | 12.01 | 6  | 5.20 | 0.87 | 6.26  |
| 2 | 2 | 26 | 1 | 5 | 9.00  | 1.65 | 9.16  | 4  | 2.56 | 0.64 | 5.81  |
| 2 | 2 | 26 | 1 | 6 | 13.20 | 1.60 | 19.32 | 4  | 3.12 | 0.78 | 3.81  |
| 2 | 2 | 26 | 1 | 7 | 11.00 | 1.60 | 9.83  | 2  | 1.70 | 0.85 | 3.62  |
| 2 | 2 | 26 | 1 | 8 | 11.20 | 1.44 | 7.84  | 2  | 1.54 | 0.77 | 2.12  |
| 2 | 2 | 26 | 2 | 1 | 8.50  | 1.50 | 8.45  | 5  | 3.53 | 0.71 | 7.83  |
| 2 | 2 | 26 | 2 | 2 | 7.50  | 1.69 | 8.42  | 7  | 4.64 | 0.66 | 6.46  |
| 2 | 2 | 26 | 2 | 3 | 12.00 | 1.55 | 14.47 | 10 | 5.94 | 0.59 | 5.57  |
| 2 | 2 | 26 | 2 | 4 | 11.50 | 1.70 | 17.58 | 5  | 3.01 | 0.60 | 4.83  |
| 2 | 2 | 26 | 2 | 5 | 13.00 | 1.65 | 16.07 | 3  | 1.98 | 0.66 | 3.60  |
| 2 | 2 | 26 | 2 | 6 | 8.00  | 1.95 | 11.43 | 6  | 5.95 | 0.99 | 7.16  |
| 2 | 2 | 26 | 2 | 7 | 8.00  | 1.80 | 10.47 | 2  | 1.64 | 0.82 | 4.83  |
| 2 | 2 | 26 | 2 | 8 | 6.50  | 1.50 | 5.82  | 3  | 1.22 | 0.41 | 4.11  |
| 2 | 2 | 26 | 3 | 1 | 15.00 | 1.90 | 26.57 | 4  | 3.50 | 0.88 | 3.92  |
| 2 | 2 | 26 | 3 | 2 | 12.50 | 1.70 | 16.58 | 7  | 5.81 | 0.83 | 5.30  |
| 2 | 2 | 26 | 3 | 3 | 12.00 | 1.60 | 14.94 | 6  | 5.29 | 0.88 | 6.69  |
| 2 | 2 | 26 | 3 | 4 | 12.80 | 1.90 | 18.79 | 8  | 7.27 | 0.91 | 13.18 |
| 2 | 2 | 26 | 3 | 5 | 13.00 | 1.70 | 18.30 | 8  | 6.57 | 0.82 | 5.71  |
| 2 | 2 | 26 | 3 | 6 | 13.50 | 1.80 | 24.01 | 8  | 6.82 | 0.85 | 8.06  |
| 2 | 2 | 26 | 3 | 7 | 12.00 | 1.70 | 17.53 | 6  | 4.40 | 0.73 | 5.60  |
| 2 | 2 | 26 | 3 | 8 | 10.50 | 1.70 | 12.18 | 5  | 3.93 | 0.79 | 5.02  |
| 2 | 2 | 31 | 1 | 1 | 9.60  | 1.50 | 16.66 | 7  | 5.04 | 0.72 | 5.13  |
| 2 | 2 | 31 | 1 | 2 | 9.60  | 1.70 | 12.30 | 5  | 3.48 | 0.70 | 4.59  |
| 2 | 2 | 31 | 1 | 3 | 8.50  | 1.35 | 12.07 | 5  | 3.36 | 0.67 | 4.59  |
| 2 | 2 | 31 | 1 | 4 | 6.80  | 1.40 | 8.04  | 7  | 4.65 | 0.66 | 4.98  |
| 2 | 2 | 31 | 1 | 5 | 10.50 | 1.60 | 16.65 | 5  | 3.81 | 0.76 | 4.12  |
| 2 | 2 | 31 | 1 | 6 | 13.00 | 1.45 | 17.47 | 7  | 2.76 | 0.39 | 6.46  |

|   |   |    |   |   |       |      |       |    |      |      |      |
|---|---|----|---|---|-------|------|-------|----|------|------|------|
| 2 | 2 | 31 | 1 | 7 | 8.90  | 1.36 | 10.15 | 5  | 2.86 | 0.57 | 4.08 |
| 2 | 2 | 31 | 1 | 8 | 6.00  | 1.31 | 7.80  | 4  | 2.61 | 0.65 | 2.37 |
| 2 | 2 | 31 | 2 | 1 | 7.80  | 1.30 | 6.72  | 4  | 2.28 | 0.57 | 1.26 |
| 2 | 2 | 31 | 2 | 2 | 8.00  | 1.31 | 7.27  | 5  | 2.32 | 0.46 | 1.96 |
| 2 | 2 | 31 | 2 | 3 | 9.50  | 1.59 | 12.08 | 6  | 3.84 | 0.64 | 3.91 |
| 2 | 2 | 31 | 2 | 4 | 8.50  | 1.25 | 10.66 | 6  | 3.94 | 0.66 | 3.93 |
| 2 | 2 | 31 | 2 | 5 | 8.70  | 1.55 | 10.44 | 5  | 3.40 | 0.68 | 3.07 |
| 2 | 2 | 31 | 2 | 6 | 8.00  | 1.45 | 10.09 | 5  | 3.45 | 0.69 | 3.14 |
| 2 | 2 | 31 | 2 | 7 | 7.50  | 1.42 | 9.99  | 6  | 3.44 | 0.57 | 3.36 |
| 2 | 2 | 31 | 2 | 8 | 9.00  | 1.30 | 11.44 | 6  | 3.80 | 0.63 | 3.25 |
| 2 | 2 | 31 | 3 | 1 | 9.30  | 1.45 | 11.90 | 8  | 2.91 | 0.36 | 3.51 |
| 2 | 2 | 31 | 3 | 2 | 11.50 | 1.60 | 15.20 | 10 | 4.30 | 0.43 | 4.38 |
| 2 | 2 | 31 | 3 | 3 | 10.00 | 1.60 | 11.70 | 7  | 2.17 | 0.31 | 4.23 |
| 2 | 2 | 31 | 3 | 4 | 10.60 | 1.20 | 12.75 | 11 | 2.41 | 0.22 | 3.83 |
| 2 | 2 | 31 | 3 | 5 | 11.80 | 1.41 | 13.08 | 5  | 2.08 | 0.42 | 2.68 |
| 2 | 2 | 31 | 3 | 6 | 13.30 | 1.60 | 13.99 | 9  | 3.19 | 0.35 | 4.72 |
| 2 | 2 | 31 | 3 | 7 | 11.00 | 1.93 | 20.30 | 11 | 4.83 | 0.44 | 8.23 |
| 2 | 2 | 31 | 3 | 8 | 9.00  | 1.47 | 10.50 | 4  | 1.17 | 0.29 | 4.36 |
| 2 | 2 | 24 | 1 | 1 | 13.70 | 1.55 | 25.82 | 12 | 7.97 | 0.66 | 8.32 |
| 2 | 2 | 24 | 1 | 2 | 11.00 | 1.45 | 15.53 | 6  | 3.90 | 0.65 | 6.54 |
| 2 | 2 | 24 | 1 | 3 | 11.20 | 1.50 | 15.95 | 6  | 2.92 | 0.49 | 6.25 |
| 2 | 2 | 24 | 1 | 4 | 13.00 | 1.35 | 17.51 | 8  | 4.34 | 0.54 | 6.21 |
| 2 | 2 | 24 | 1 | 5 | 11.80 | 1.50 | 16.60 | 6  | 3.53 | 0.59 | 5.98 |
| 2 | 2 | 24 | 1 | 6 | 12.80 | 1.66 | 21.96 | 12 | 7.03 | 0.59 | 7.62 |
| 2 | 2 | 24 | 1 | 7 | 10.00 | 1.25 | 11.58 | 7  | 3.40 | 0.49 | 4.97 |
| 2 | 2 | 24 | 1 | 8 | 11.00 | 1.36 | 16.56 | 10 | 4.90 | 0.49 | 7.77 |
| 2 | 2 | 24 | 2 | 1 | 11.00 | 1.60 | 18.96 | 8  | 5.59 | 0.70 | 6.75 |
| 2 | 2 | 24 | 2 | 2 | 12.00 | 1.60 | 20.47 | 9  | 6.03 | 0.67 | 7.23 |
| 2 | 2 | 24 | 2 | 3 | 11.20 | 1.45 | 18.83 | 11 | 5.74 | 0.52 | 6.41 |
| 2 | 2 | 24 | 2 | 4 | 12.00 | 1.60 | 15.85 | 6  | 3.50 | 0.58 | 6.84 |
| 2 | 2 | 24 | 2 | 5 | 9.50  | 1.35 | 13.38 | 7  | 3.71 | 0.53 | 5.05 |
| 2 | 2 | 24 | 2 | 6 | 9.50  | 1.30 | 12.92 | 7  | 3.65 | 0.52 | 4.35 |
| 2 | 2 | 24 | 2 | 7 | 11.00 | 1.75 | 12.40 | 6  | 2.73 | 0.46 | 5.49 |
| 2 | 2 | 24 | 2 | 8 | 12.00 | 1.35 | 18.36 | 9  | 5.70 | 0.63 | 6.03 |
| 2 | 2 | 24 | 3 | 1 | 10.60 | 1.55 | 14.88 | 7  | 4.37 | 0.62 | 4.92 |
| 2 | 2 | 24 | 3 | 2 | 13.00 | 1.55 | 20.28 | 9  | 5.89 | 0.65 | 8.61 |



|   |   |    |   |   |       |      |       |    |      |      |      |
|---|---|----|---|---|-------|------|-------|----|------|------|------|
| 2 | 2 | 24 | 3 | 3 | 11.50 | 1.40 | 18.41 | 11 | 5.38 | 0.49 | 5.93 |
| 2 | 2 | 24 | 3 | 4 | 12.00 | 1.60 | 21.38 | 11 | 6.77 | 0.62 | 5.91 |
| 2 | 2 | 24 | 3 | 5 | 10.00 | 1.45 | 18.00 | 10 | 5.75 | 0.58 | 7.08 |
| 2 | 2 | 24 | 3 | 6 | 9.80  | 1.35 | 13.08 | 6  | 3.09 | 0.52 | 3.53 |
| 2 | 2 | 24 | 3 | 7 | 11.00 | 1.45 | 16.11 | 8  | 4.46 | 0.56 | 6.79 |
| 2 | 2 | 24 | 3 | 8 | 12.00 | 1.45 | 16.60 | 8  | 4.71 | 0.59 | 7.80 |
| 2 | 2 | 25 | 1 | 1 | 10.10 | 1.50 | 14.48 | 7  | 3.76 | 0.54 | 3.52 |
| 2 | 2 | 25 | 1 | 2 | 8.50  | 1.56 | 11.75 | 9  | 5.81 | 0.65 | 5.79 |
| 2 | 2 | 25 | 1 | 3 | 11.50 | 1.70 | 20.29 | 9  | 4.79 | 0.53 | 5.79 |
| 2 | 2 | 25 | 1 | 4 | 9.20  | 1.58 | 16.19 | 4  | 2.32 | 0.58 | 2.85 |
| 2 | 2 | 25 | 1 | 5 | 8.10  | 1.55 | 11.10 | 9  | 4.60 | 0.51 | 4.49 |
| 2 | 2 | 25 | 1 | 6 | 10.50 | 1.51 | 12.33 | 9  | 4.46 | 0.50 | 4.69 |
| 2 | 2 | 25 | 1 | 7 | 9.50  | 1.30 | 13.57 | 12 | 5.62 | 0.47 | 3.69 |
| 2 | 2 | 25 | 1 | 8 | 7.80  | 1.44 | 10.69 | 8  | 3.64 | 0.46 | 3.53 |
| 2 | 2 | 25 | 2 | 1 | 7.80  | 1.25 | 8.64  | 6  | 2.60 | 0.43 | 2.95 |
| 2 | 2 | 25 | 2 | 2 | 8.60  | 1.25 | 10.26 | 3  | 1.60 | 0.53 | 5.35 |
| 2 | 2 | 25 | 2 | 3 | 7.10  | 1.45 | 11.57 | 6  | 3.55 | 0.59 | 4.56 |
| 2 | 2 | 25 | 2 | 4 | 7.00  | 1.40 | 10.41 | 7  | 3.48 | 0.50 | 3.78 |
| 2 | 2 | 25 | 2 | 5 | 8.50  | 1.25 | 12.65 | 9  | 3.72 | 0.41 | 4.73 |
| 2 | 2 | 25 | 2 | 6 | 8.30  | 1.30 | 11.09 | 9  | 3.52 | 0.39 | 4.13 |
| 2 | 2 | 25 | 2 | 7 | 7.30  | 1.35 | 9.69  | 5  | 2.71 | 0.54 | 4.12 |
| 2 | 2 | 25 | 2 | 8 | 7.70  | 1.15 | 9.63  | 7  | 2.83 | 0.40 | 4.02 |
| 2 | 2 | 25 | 3 | 1 | 8.90  | 1.55 | 12.26 | 7  | 2.90 | 0.41 | 4.64 |
| 2 | 2 | 25 | 3 | 2 | 8.70  | 1.40 | 12.59 | 7  | 3.16 | 0.45 | 3.92 |
| 2 | 2 | 25 | 3 | 3 | 7.30  | 1.50 | 13.32 | 9  | 4.38 | 0.49 | 4.72 |
| 2 | 2 | 25 | 3 | 4 | 8.10  | 1.55 | 14.41 | 8  | 4.12 | 0.52 | 5.48 |
| 2 | 2 | 25 | 3 | 5 | 9.00  | 1.55 | 18.17 | 13 | 5.96 | 0.46 | 6.85 |
| 2 | 2 | 25 | 3 | 6 | 8.80  | 1.45 | 13.95 | 9  | 4.53 | 0.50 | 5.59 |
| 2 | 2 | 25 | 3 | 7 | 7.90  | 1.31 | 10.62 | 7  | 2.24 | 0.32 | 4.42 |
| 2 | 2 | 25 | 3 | 8 | 7.20  | 1.30 | 8.45  | 5  | 2.41 | 0.48 | 3.06 |
| 2 | 2 | 21 | 1 | 1 | 12.00 | 1.90 | 24.22 | 8  | 8.85 | 1.11 | 8.21 |
| 2 | 2 | 21 | 1 | 2 | 9.30  | 1.65 | 12.96 | 5  | 4.25 | 0.85 | 4.97 |
| 2 | 2 | 21 | 1 | 3 | 8.50  | 1.90 | 14.54 | 4  | 5.03 | 1.26 | 6.98 |
| 2 | 2 | 21 | 1 | 4 | 11.00 | 1.95 | 18.71 | 6  | 6.28 | 1.05 | 7.27 |
| 2 | 2 | 21 | 1 | 5 | 10.00 | 1.70 | 14.95 | 6  | 5.71 | 0.95 | 5.53 |
| 2 | 2 | 21 | 1 | 6 | 10.50 | 1.55 | 15.03 | 8  | 4.47 | 0.56 | 4.65 |

|   |   |    |   |   |       |      |       |    |       |      |       |
|---|---|----|---|---|-------|------|-------|----|-------|------|-------|
| 2 | 2 | 21 | 1 | 7 | 8.20  | 1.85 | 10.66 | 4  | 3.55  | 0.89 | 4.99  |
| 2 | 2 | 21 | 1 | 8 | 11.00 | 1.80 | 11.82 | 3  | 3.44  | 1.15 | 3.34  |
| 2 | 2 | 21 | 2 | 1 | 5.60  | 1.29 | 6.58  | 2  | 1.94  | 0.97 | 2.72  |
| 2 | 2 | 21 | 2 | 2 | 7.90  | 1.65 | 11.62 | 3  | 3.62  | 1.21 | 4.83  |
| 2 | 2 | 21 | 2 | 3 | 7.80  | 1.81 | 12.88 | 3  | 3.65  | 1.22 | 5.78  |
| 2 | 2 | 21 | 2 | 4 | 8.50  | 1.80 | 15.72 | 5  | 4.87  | 0.97 | 5.84  |
| 2 | 2 | 21 | 2 | 5 | 6.40  | 1.65 | 9.85  | 3  | 3.43  | 1.14 | 4.08  |
| 2 | 2 | 21 | 2 | 6 | 8.00  | 1.65 | 10.58 | 4  | 3.96  | 0.99 | 3.80  |
| 2 | 2 | 21 | 2 | 7 | 6.20  | 1.51 | 9.51  | 4  | 3.86  | 0.97 | 3.95  |
| 2 | 2 | 21 | 2 | 8 | 7.50  | 1.85 | 10.50 | 2  | 2.05  | 1.03 | 6.17  |
| 2 | 2 | 21 | 3 | 1 | 13.00 | 1.88 | 25.37 | 8  | 8.94  | 1.12 | 8.23  |
| 2 | 2 | 21 | 3 | 2 | 9.00  | 1.75 | 11.83 | 5  | 5.00  | 1.00 | 4.62  |
| 2 | 2 | 21 | 3 | 3 | 11.50 | 1.80 | 14.38 | 3  | 3.47  | 1.16 | 6.52  |
| 2 | 2 | 21 | 3 | 4 | 13.80 | 1.70 | 25.41 | 9  | 9.31  | 1.03 | 7.98  |
| 2 | 2 | 21 | 3 | 5 | 11.00 | 1.95 | 23.74 | 6  | 6.56  | 1.09 | 8.50  |
| 2 | 2 | 21 | 3 | 6 | 9.20  | 1.84 | 15.44 | 4  | 4.85  | 1.21 | 5.84  |
| 2 | 2 | 21 | 3 | 7 | 7.00  | 1.86 | 14.07 | 4  | 5.24  | 1.31 | 5.10  |
| 2 | 2 | 21 | 3 | 8 | 15.40 | 1.90 | 31.11 | 12 | 11.92 | 0.99 | 10.85 |
| 2 | 2 | 23 | 1 | 1 | 12.00 | 2.00 | 12.73 | 4  | 3.54  | 0.89 | 1.74  |
| 2 | 2 | 23 | 1 | 2 | 16.00 | 1.83 | 21.64 | 6  | 4.91  | 0.82 | 3.90  |
| 2 | 2 | 23 | 1 | 3 | 11.80 | 1.77 | 14.37 | 5  | 3.26  | 0.65 | 6.57  |
| 2 | 2 | 23 | 1 | 4 | 10.80 | 1.98 | 14.03 | 6  | 5.47  | 0.91 | 3.33  |
| 2 | 2 | 23 | 1 | 5 | 16.80 | 1.88 | 23.67 | 5  | 4.13  | 0.83 | 2.27  |
| 2 | 2 | 23 | 1 | 6 | 13.00 | 1.98 | 13.05 | 9  | 7.38  | 0.82 | 2.78  |
| 2 | 2 | 23 | 1 | 7 | 9.12  | 1.82 | 12.75 | 7  | 5.07  | 0.72 | 2.28  |
| 2 | 2 | 23 | 1 | 8 | 12.80 | 1.67 | 18.79 | 4  | 3.59  | 0.90 | 2.11  |
| 2 | 2 | 23 | 2 | 1 | 10.20 | 1.79 | 15.66 | 6  | 3.63  | 0.61 | 5.71  |
| 2 | 2 | 23 | 2 | 2 | 10.50 | 1.81 | 12.90 | 5  | 2.81  | 0.56 | 3.56  |
| 2 | 2 | 23 | 2 | 3 | 6.80  | 1.74 | 10.36 | 4  | 2.51  | 0.63 | 3.38  |
| 2 | 2 | 23 | 2 | 4 | 15.20 | 1.95 | 22.90 | 10 | 6.33  | 0.63 | 8.84  |
| 2 | 2 | 23 | 2 | 5 | 9.00  | 1.63 | 9.27  | 3  | 1.73  | 0.58 | 4.07  |
| 2 | 2 | 23 | 2 | 6 | 9.20  | 1.46 | 8.72  | 2  | 0.85  | 0.43 | 4.40  |
| 2 | 2 | 23 | 2 | 7 | 8.20  | 1.58 | 8.55  | 3  | 1.61  | 0.54 | 3.77  |
| 2 | 2 | 23 | 2 | 8 | 6.80  | 1.72 | 8.59  | 4  | 2.16  | 0.54 | 3.42  |
| 2 | 2 | 23 | 3 | 1 | 11.10 | 1.95 | 17.33 | 6  | 3.84  | 0.64 | 5.04  |
| 2 | 2 | 23 | 3 | 2 | 14.50 | 1.54 | 21.31 | 6  | 4.20  | 0.70 | 6.84  |

|   |   |    |   |   |       |      |       |    |      |      |      |
|---|---|----|---|---|-------|------|-------|----|------|------|------|
| 2 | 2 | 23 | 3 | 3 | 18.20 | 1.90 | 27.22 | 11 | 8.00 | 0.73 | 7.07 |
| 2 | 2 | 23 | 3 | 4 | 11.20 | 1.69 | 15.87 | 4  | 1.83 | 0.46 | 4.92 |
| 2 | 2 | 23 | 3 | 5 | 13.60 | 2.04 | 22.87 | 8  | 4.86 | 0.61 | 9.06 |
| 2 | 2 | 23 | 3 | 6 | 9.00  | 1.87 | 15.64 | 5  | 3.05 | 0.61 | 6.13 |
| 2 | 2 | 23 | 3 | 7 | 9.10  | 1.80 | 12.07 | 4  | 2.61 | 0.65 | 4.39 |
| 2 | 2 | 23 | 3 | 8 | 5.50  | 1.90 | 6.63  | 2  | 1.41 | 0.71 | 2.62 |
| 2 | 2 | 32 | 1 | 1 | 12.80 | 1.51 | 13.65 | 8  | 5.82 | 0.73 | 5.30 |
| 2 | 2 | 32 | 1 | 2 | 11.20 | 1.42 | 14.40 | 9  | 4.85 | 0.54 | 6.28 |
| 2 | 2 | 32 | 1 | 3 | 10.50 | 1.55 | 13.44 | 8  | 4.23 | 0.53 | 6.37 |
| 2 | 2 | 32 | 1 | 4 | 13.50 | 1.70 | 15.97 | 11 | 7.10 | 0.65 | 9.80 |
| 2 | 2 | 32 | 1 | 5 | 8.50  | 1.51 | 9.62  | 7  | 3.72 | 0.53 | 4.95 |
| 2 | 2 | 32 | 1 | 6 | 8.00  | 1.45 | 10.22 | 7  | 3.85 | 0.55 | 4.99 |
| 2 | 2 | 32 | 1 | 7 | 12.00 | 1.47 | 14.83 | 7  | 4.19 | 0.60 | 5.18 |
| 2 | 2 | 32 | 1 | 8 | 7.90  | 1.53 | 11.50 | 9  | 4.88 | 0.54 | 7.34 |
| 2 | 2 | 32 | 2 | 1 | 11.50 | 1.66 | 16.18 | 4  | 2.95 | 0.74 | 5.93 |
| 2 | 2 | 32 | 2 | 2 | 13.00 | 1.65 | 16.28 | 8  | 5.63 | 0.70 | 4.83 |
| 2 | 2 | 32 | 2 | 3 | 11.50 | 1.49 | 16.19 | 8  | 6.18 | 0.77 | 5.70 |
| 2 | 2 | 32 | 2 | 4 | 16.00 | 1.46 | 21.21 | 7  | 4.16 | 0.59 | 4.84 |
| 2 | 2 | 32 | 2 | 5 | 11.90 | 1.40 | 13.01 | 3  | 1.81 | 0.60 | 4.26 |
| 2 | 2 | 32 | 2 | 6 | 11.60 | 1.38 | 12.20 | 2  | 1.47 | 0.74 | 4.74 |
| 2 | 2 | 32 | 2 | 7 | 11.20 | 1.60 | 17.78 | 6  | 3.84 | 0.64 | 5.64 |
| 2 | 2 | 32 | 2 | 8 | 10.00 | 1.46 | 13.30 | 6  | 4.50 | 0.75 | 4.20 |
| 2 | 2 | 32 | 3 | 1 | 9.00  | 1.63 | 11.20 | 6  | 3.50 | 0.58 | 4.00 |
| 2 | 2 | 32 | 3 | 2 | 11.50 | 1.68 | 17.90 | 9  | 6.38 | 0.71 | 6.23 |
| 2 | 2 | 32 | 3 | 3 | 10.00 | 1.55 | 15.40 | 8  | 5.26 | 0.66 | 6.28 |
| 2 | 2 | 32 | 3 | 4 | 13.20 | 1.65 | 20.95 | 12 | 8.28 | 0.69 | 7.14 |
| 2 | 2 | 32 | 3 | 5 | 13.50 | 1.70 | 17.50 | 9  | 6.33 | 0.70 | 6.05 |
| 2 | 2 | 32 | 3 | 6 | 10.20 | 1.15 | 11.54 | 7  | 3.75 | 0.54 | 5.27 |
| 2 | 2 | 32 | 3 | 7 | 12.00 | 1.36 | 11.44 | 7  | 4.37 | 0.62 | 4.23 |
| 2 | 2 | 32 | 3 | 8 | 15.50 | 1.65 | 18.04 | 9  | 6.03 | 0.67 | 6.76 |
| 2 | 2 | 30 | 1 | 1 | 8.00  | 1.85 | 11.62 | 5  | 1.58 | 0.32 | 3.98 |
| 2 | 2 | 30 | 1 | 2 | 8.50  | 1.47 | 9.55  | 8  | 4.42 | 0.55 | 3.70 |
| 2 | 2 | 30 | 1 | 3 | 10.00 | 1.60 | 13.53 | 5  | 1.86 | 0.37 | 5.72 |
| 2 | 2 | 30 | 1 | 4 | 9.00  | 1.50 | 11.83 | 6  | 3.50 | 0.58 | 3.97 |
| 2 | 2 | 30 | 1 | 5 | 9.60  | 1.63 | 15.73 | 7  | 5.39 | 0.77 | 5.33 |
| 2 | 2 | 30 | 1 | 6 | 11.60 | 1.60 | 17.19 | 7  | 4.88 | 0.70 | 6.49 |

|   |   |    |   |   |       |      |       |    |      |      |      |
|---|---|----|---|---|-------|------|-------|----|------|------|------|
| 2 | 2 | 30 | 1 | 7 | 8.20  | 1.39 | 9.64  | 2  | 1.20 | 0.60 | 5.38 |
| 2 | 2 | 30 | 1 | 8 | 7.00  | 1.30 | 7.88  | 3  | 1.88 | 0.63 | 3.39 |
| 2 | 2 | 30 | 2 | 1 | 5.00  | 1.31 | 4.81  | 3  | 1.30 | 0.43 | 2.00 |
| 2 | 2 | 30 | 2 | 2 | 5.50  | 1.36 | 5.85  | 3  | 1.68 | 0.56 | 2.50 |
| 2 | 2 | 30 | 2 | 3 | 7.20  | 1.48 | 8.53  | 4  | 2.83 | 0.71 | 3.36 |
| 2 | 2 | 30 | 2 | 4 | 6.30  | 1.50 | 7.80  | 2  | 1.78 | 0.89 | 2.97 |
| 2 | 2 | 30 | 2 | 5 | 7.80  | 1.34 | 5.55  | 2  | 0.73 | 0.37 | 2.36 |
| 2 | 2 | 30 | 2 | 6 | 7.30  | 1.65 | 8.31  | 4  | 2.57 | 0.64 | 3.13 |
| 2 | 2 | 30 | 2 | 7 | 6.50  | 1.21 | 6.08  | 3  | 1.86 | 0.62 | 2.45 |
| 2 | 2 | 30 | 2 | 8 | 5.00  | 1.31 | 4.49  | 2  | 1.21 | 0.61 | 1.57 |
| 2 | 2 | 30 | 3 | 1 | 11.00 | 1.43 | 12.54 | 7  | 3.95 | 0.56 | 4.31 |
| 2 | 2 | 30 | 3 | 2 | 10.00 | 1.30 | 9.93  | 5  | 2.46 | 0.49 | 3.57 |
| 2 | 2 | 30 | 3 | 3 | 11.00 | 1.59 | 10.89 | 6  | 1.91 | 0.32 | 5.01 |
| 2 | 2 | 30 | 3 | 4 | 10.60 | 1.52 | 12.63 | 4  | 2.62 | 0.66 | 6.11 |
| 2 | 2 | 30 | 3 | 5 | 8.00  | 1.60 | 11.10 | 6  | 4.16 | 0.69 | 3.75 |
| 2 | 2 | 30 | 3 | 6 | 8.90  | 1.54 | 11.04 | 6  | 3.64 | 0.61 | 3.89 |
| 2 | 2 | 30 | 3 | 7 | 8.20  | 1.49 | 7.35  | 3  | 1.80 | 0.60 | 3.76 |
| 2 | 2 | 30 | 3 | 8 | 7.20  | 1.48 | 9.46  | 5  | 3.06 | 0.61 | 3.66 |
| 2 | 2 | 29 | 1 | 1 | 13.20 | 1.90 | 24.52 | 9  | 7.48 | 0.83 | 8.05 |
| 2 | 2 | 29 | 1 | 2 | 7.20  | 1.53 | 7.96  | 3  | 1.12 | 0.37 | 2.56 |
| 2 | 2 | 29 | 1 | 3 | 6.80  | 1.60 | 10.75 | 5  | 3.40 | 0.68 | 3.55 |
| 2 | 2 | 29 | 1 | 4 | 9.20  | 1.59 | 10.21 | 3  | 2.18 | 0.73 | 4.30 |
| 2 | 2 | 29 | 1 | 5 | 10.00 | 1.73 | 13.35 | 5  | 3.69 | 0.74 | 4.87 |
| 2 | 2 | 29 | 1 | 6 | 5.60  | 1.78 | 9.74  | 4  | 2.50 | 0.63 | 3.99 |
| 2 | 2 | 29 | 1 | 7 | 8.80  | 1.90 | 11.81 | 3  | 2.65 | 0.88 | 4.90 |
| 2 | 2 | 29 | 1 | 8 | 8.40  | 1.42 | 8.48  | 3  | 1.90 | 0.63 | 2.81 |
| 2 | 2 | 29 | 2 | 1 | 14.00 | 1.62 | 17.72 | 9  | 5.12 | 0.57 | 6.53 |
| 2 | 2 | 29 | 2 | 2 | 8.00  | 1.59 | 10.43 | 4  | 2.41 | 0.60 | 3.03 |
| 2 | 2 | 29 | 2 | 3 | 7.90  | 1.54 | 13.53 | 4  | 3.40 | 0.85 | 5.18 |
| 2 | 2 | 29 | 2 | 4 | 11.40 | 1.66 | 15.82 | 4  | 3.09 | 0.77 | 5.98 |
| 2 | 2 | 29 | 2 | 5 | 6.80  | 1.82 | 10.66 | 3  | 2.66 | 0.89 | 3.52 |
| 2 | 2 | 29 | 2 | 6 | 10.50 | 1.55 | 13.17 | 10 | 4.00 | 0.40 | 3.84 |
| 2 | 2 | 29 | 2 | 7 | 6.50  | 1.36 | 5.26  | 3  | 1.22 | 0.41 | 3.04 |
| 2 | 2 | 29 | 2 | 8 | 11.20 | 1.22 | 11.58 | 10 | 5.00 | 0.50 | 2.85 |
| 2 | 2 | 29 | 3 | 1 | 17.20 | 1.56 | 24.60 | 14 | 8.54 | 0.61 | 7.22 |
| 2 | 2 | 29 | 3 | 2 | 13.50 | 1.51 | 17.21 | 6  | 4.00 | 0.67 | 5.53 |

|   |   |    |   |   |       |      |       |    |      |      |       |
|---|---|----|---|---|-------|------|-------|----|------|------|-------|
| 2 | 2 | 29 | 3 | 3 | 12.40 | 1.64 | 19.62 | 8  | 5.68 | 0.71 | 6.87  |
| 2 | 2 | 29 | 3 | 4 | 16.20 | 1.73 | 23.98 | 11 | 7.25 | 0.66 | 8.85  |
| 2 | 2 | 29 | 3 | 5 | 9.20  | 1.98 | 18.89 | 6  | 5.52 | 0.92 | 6.70  |
| 2 | 2 | 29 | 3 | 6 | 11.00 | 1.53 | 14.81 | 8  | 5.27 | 0.66 | 6.70  |
| 2 | 2 | 29 | 3 | 7 | 9.00  | 1.58 | 12.25 | 3  | 1.96 | 0.65 | 2.48  |
| 2 | 2 | 29 | 3 | 8 | 9.10  | 1.51 | 11.52 | 4  | 2.65 | 0.66 | 4.01  |
| 2 | 2 | 15 | 1 | 1 | 10.50 | 1.57 | 11.82 | 9  | 2.04 | 0.23 | 4.26  |
| 2 | 2 | 15 | 1 | 2 | 12.30 | 1.75 | 14.28 | 9  | 1.78 | 0.20 | 5.22  |
| 2 | 2 | 15 | 1 | 3 | 10.00 | 1.56 | 8.22  | 2  | 0.74 | 0.37 | 2.88  |
| 2 | 2 | 15 | 1 | 4 | 10.20 | 1.43 | 10.20 | 8  | 1.48 | 0.19 | 3.28  |
| 2 | 2 | 15 | 1 | 5 | 9.40  | 1.47 | 5.87  | 3  | 0.30 | 0.10 | 3.02  |
| 2 | 2 | 15 | 1 | 6 | 7.60  | 1.44 | 4.63  | 3  | 0.48 | 0.16 | 2.12  |
| 2 | 2 | 15 | 1 | 7 | 4.20  | 1.22 | 3.93  | 2  | 0.44 | 0.22 | 1.33  |
| 2 | 2 | 15 | 1 | 8 | 6.00  | 1.45 | 5.53  | 4  | 0.66 | 0.17 | 2.33  |
| 2 | 2 | 15 | 2 | 1 | 10.10 | 1.63 | 11.39 | 4  | 1.36 | 0.34 | 4.63  |
| 2 | 2 | 15 | 2 | 2 | 8.10  | 1.62 | 10.79 | 5  | 1.82 | 0.36 | 4.73  |
| 2 | 2 | 15 | 2 | 3 | 8.00  | 1.41 | 8.25  | 3  | 1.15 | 0.38 | 3.17  |
| 2 | 2 | 15 | 2 | 4 | 10.20 | 1.40 | 9.12  | 3  | 1.23 | 0.41 | 4.96  |
| 2 | 2 | 15 | 2 | 5 | 7.00  | 1.63 | 8.86  | 5  | 1.51 | 0.30 | 3.74  |
| 2 | 2 | 15 | 2 | 6 | 8.00  | 1.40 | 7.34  | 5  | 1.29 | 0.26 | 2.56  |
| 2 | 2 | 15 | 2 | 7 | 8.40  | 1.46 | 8.95  | 5  | 2.17 | 0.43 | 3.77  |
| 2 | 2 | 15 | 2 | 8 | 6.40  | 1.42 | 7.00  | 6  | 1.98 | 0.33 | 2.07  |
| 2 | 2 | 15 | 3 | 1 | 9.00  | 1.15 | 6.25  | 4  | 1.02 | 0.26 | 1.50  |
| 2 | 2 | 15 | 3 | 2 | 7.50  | 1.67 | 8.31  | 3  | 1.47 | 0.49 | 3.52  |
| 2 | 2 | 15 | 3 | 3 | 6.50  | 1.53 | 7.99  | 4  | 1.82 | 0.46 | 3.02  |
| 2 | 2 | 15 | 3 | 4 | 7.40  | 1.53 | 10.39 | 6  | 2.44 | 0.41 | 3.56  |
| 2 | 2 | 15 | 3 | 5 | 10.50 | 1.60 | 14.10 | 6  | 2.86 | 0.48 | 5.02  |
| 2 | 2 | 15 | 3 | 6 | 9.00  | 1.70 | 10.91 | 5  | 2.85 | 0.57 | 3.55  |
| 2 | 2 | 15 | 3 | 7 | 8.50  | 1.61 | 11.47 | 5  | 2.81 | 0.56 | 3.68  |
| 2 | 2 | 15 | 3 | 8 | 11.00 | 1.48 | 10.42 | 5  | 1.78 | 0.36 | 3.84  |
| 2 | 2 | 1  | 1 | 1 | 8.00  | 1.64 | 9.50  | 4  | 1.52 | 0.38 | 3.30  |
| 2 | 2 | 1  | 1 | 2 | 11.20 | 2.11 | 27.33 | 9  | 6.13 | 0.68 | 10.22 |
| 2 | 2 | 1  | 1 | 3 | 10.00 | 1.85 | 20.06 | 6  | 4.03 | 0.67 | 6.60  |
| 2 | 2 | 1  | 1 | 4 | 7.20  | 2.00 | 15.48 | 8  | 5.05 | 0.63 | 9.08  |
| 2 | 2 | 1  | 1 | 5 | 11.00 | 1.90 | 22.96 | 4  | 2.36 | 0.59 | 6.06  |
| 2 | 2 | 1  | 1 | 6 | 10.20 | 1.95 | 25.48 | 7  | 4.92 | 0.70 | 9.80  |

|   |   |   |   |   |       |      |       |    |      |      |       |
|---|---|---|---|---|-------|------|-------|----|------|------|-------|
| 2 | 2 | 1 | 1 | 7 | 10.60 | 1.90 | 22.58 | 8  | 5.43 | 0.68 | 8.52  |
| 2 | 2 | 1 | 1 | 8 | 9.00  | 1.76 | 20.56 | 6  | 3.63 | 0.61 | 8.12  |
| 2 | 2 | 1 | 2 | 1 | 9.20  | 2.20 | 20.74 | 6  | 4.82 | 0.80 | 6.28  |
| 2 | 2 | 1 | 2 | 2 | 9.40  | 2.10 | 20.78 | 7  | 4.89 | 0.70 | 7.61  |
| 2 | 2 | 1 | 2 | 3 | 8.90  | 1.70 | 14.44 | 5  | 2.97 | 0.59 | 5.16  |
| 2 | 2 | 1 | 2 | 4 | 11.60 | 1.90 | 22.55 | 5  | 3.33 | 0.67 | 4.15  |
| 2 | 2 | 1 | 2 | 5 | 7.00  | 1.85 | 11.22 | 6  | 3.96 | 0.66 | 7.47  |
| 2 | 2 | 1 | 2 | 6 | 8.60  | 1.62 | 16.59 | 3  | 1.70 | 0.57 | 7.34  |
| 2 | 2 | 1 | 2 | 7 | 6.50  | 1.55 | 5.18  | 4  | 2.01 | 0.50 | 1.53  |
| 2 | 2 | 1 | 2 | 8 | 6.50  | 1.60 | 8.13  | 4  | 2.30 | 0.58 | 3.50  |
| 2 | 2 | 1 | 3 | 1 | 10.70 | 1.75 | 15.58 | 8  | 3.05 | 0.38 | 5.28  |
| 2 | 2 | 1 | 3 | 2 | 12.20 | 1.80 | 26.91 | 11 | 5.36 | 0.49 | 11.84 |
| 2 | 2 | 1 | 3 | 3 | 13.00 | 1.75 | 29.06 | 12 | 6.09 | 0.51 | 11.15 |
| 2 | 2 | 1 | 3 | 4 | 13.40 | 2.10 | 28.88 | 10 | 6.37 | 0.64 | 10.60 |
| 2 | 2 | 1 | 3 | 5 | 11.20 | 1.85 | 16.48 | 7  | 2.98 | 0.43 | 6.40  |
| 2 | 2 | 1 | 3 | 6 | 6.50  | 1.61 | 10.18 | 4  | 2.06 | 0.52 | 4.92  |
| 2 | 2 | 1 | 3 | 7 | 9.50  | 1.65 | 18.44 | 8  | 3.80 | 0.48 | 8.15  |
| 2 | 2 | 1 | 3 | 8 | 5.20  | 1.75 | 7.90  | 3  | 1.33 | 0.44 | 3.01  |
| 3 | 2 | 1 | 1 | 1 | 15.80 | 1.80 | 17.18 | 7  | 4.32 | 0.62 | 7.81  |
| 3 | 2 | 1 | 1 | 2 | 14.60 | 1.59 | 14.16 | 11 | 5.26 | 0.48 | 5.29  |
| 3 | 2 | 1 | 1 | 3 | 9.90  | 1.99 | 10.83 | 7  | 3.94 | 0.56 | 4.33  |
| 3 | 2 | 1 | 1 | 4 | 9.70  | 1.40 | 7.85  | 7  | 3.29 | 0.47 | 2.83  |
| 3 | 2 | 1 | 1 | 5 | 10.30 | 1.59 | 8.35  | 6  | 3.29 | 0.55 | 3.69  |
| 3 | 2 | 1 | 1 | 6 | 15.20 | 1.70 | 15.75 | 9  | 6.02 | 0.67 | 5.94  |
| 3 | 2 | 1 | 1 | 7 | 8.10  | 1.85 | 9.14  | 5  | 3.09 | 0.62 | 3.79  |
| 3 | 2 | 1 | 1 | 8 | 8.50  | 1.59 | 9.05  | 6  | 3.82 | 0.64 | 4.89  |
| 3 | 2 | 1 | 2 | 1 | 14.70 | 1.84 | 17.06 | 9  | 5.46 | 0.61 | 5.58  |
| 3 | 2 | 1 | 2 | 2 | 14.80 | 1.89 | 16.03 | 11 | 5.68 | 0.52 | 5.95  |
| 3 | 2 | 1 | 2 | 3 | 14.30 | 1.70 | 16.46 | 10 | 5.41 | 0.54 | 6.34  |
| 3 | 2 | 1 | 2 | 4 | 15.20 | 1.89 | 9.93  | 6  | 1.09 | 0.18 | 4.15  |
| 3 | 2 | 1 | 2 | 5 | 12.80 | 1.55 | 11.55 | 5  | 2.92 | 0.58 | 5.12  |
| 3 | 2 | 1 | 2 | 6 | 14.10 | 1.75 | 16.23 | 4  | 2.21 | 0.55 | 2.72  |
| 3 | 2 | 1 | 2 | 7 | 14.50 | 1.79 | 15.95 | 7  | 3.17 | 0.45 | 4.06  |
| 3 | 2 | 1 | 2 | 8 | 6.90  | 1.60 | 4.42  | 6  | 1.64 | 0.27 | 0.65  |
| 3 | 2 | 1 | 3 | 1 | 16.90 | 2.05 | 21.15 | 10 | 8.34 | 0.83 | 9.50  |
| 3 | 2 | 1 | 3 | 2 | 13.20 | 1.80 | 14.42 | 8  | 4.07 | 0.51 | 4.50  |

|   |   |   |   |   |       |      |       |    |      |      |      |
|---|---|---|---|---|-------|------|-------|----|------|------|------|
| 3 | 2 | 1 | 3 | 3 | 14.50 | 1.85 | 16.94 | 10 | 6.16 | 0.62 | 7.77 |
| 3 | 2 | 1 | 3 | 4 | 13.40 | 1.75 | 13.72 | 9  | 4.87 | 0.54 | 3.16 |
| 3 | 2 | 1 | 3 | 5 | 15.40 | 1.70 | 16.14 | 9  | 5.35 | 0.59 | 5.40 |
| 3 | 2 | 1 | 3 | 6 | 12.20 | 1.80 | 11.85 | 8  | 3.92 | 0.49 | 4.17 |
| 3 | 2 | 1 | 3 | 7 | 16.90 | 1.75 | 20.33 | 14 | 7.04 | 0.50 | 7.11 |
| 3 | 2 | 1 | 3 | 8 | 10.90 | 1.85 | 11.99 | 8  | 4.06 | 0.51 | 4.06 |
| 3 | 2 | 2 | 1 | 1 | 9.50  | 1.94 | 10.57 | 4  | 2.68 | 0.67 | 3.75 |
| 3 | 2 | 2 | 1 | 2 | 13.60 | 1.89 | 15.87 | 9  | 4.37 | 0.49 | 5.98 |
| 3 | 2 | 2 | 1 | 3 | 12.20 | 2.08 | 15.03 | 7  | 5.18 | 0.74 | 6.28 |
| 3 | 2 | 2 | 1 | 4 | 15.30 | 1.95 | 17.52 | 8  | 5.52 | 0.69 | 7.02 |
| 3 | 2 | 2 | 1 | 5 | 15.80 | 1.98 | 19.73 | 10 | 7.44 | 0.74 | 9.39 |
| 3 | 2 | 2 | 1 | 6 | 16.50 | 2.04 | 19.13 | 9  | 5.85 | 0.65 | 8.05 |
| 3 | 2 | 2 | 1 | 7 | 10.20 | 2.04 | 10.26 | 3  | 1.95 | 0.65 | 5.74 |
| 3 | 2 | 2 | 1 | 8 | 15.20 | 2.00 | 17.98 | 9  | 5.50 | 0.61 | 6.61 |
| 3 | 2 | 2 | 2 | 1 | 13.70 | 1.95 | 13.20 | 7  | 4.48 | 0.64 | 4.92 |
| 3 | 2 | 2 | 2 | 2 | 10.40 | 1.95 | 12.39 | 6  | 3.58 | 0.60 | 5.32 |
| 3 | 2 | 2 | 2 | 3 | 15.70 | 1.94 | 18.51 | 8  | 5.38 | 0.67 | 8.22 |
| 3 | 2 | 2 | 2 | 4 | 12.40 | 2.00 | 10.89 | 7  | 3.99 | 0.57 | 2.81 |
| 3 | 2 | 2 | 2 | 5 | 13.70 | 1.85 | 19.21 | 12 | 6.96 | 0.58 | 6.63 |
| 3 | 2 | 2 | 2 | 6 | 13.10 | 1.65 | 17.06 | 9  | 5.55 | 0.62 | 7.43 |
| 3 | 2 | 2 | 2 | 7 | 12.00 | 1.89 | 14.18 | 7  | 5.34 | 0.76 | 4.82 |
| 3 | 2 | 2 | 2 | 8 | 12.00 | 1.55 | 12.92 | 7  | 4.67 | 0.67 | 5.49 |
| 3 | 2 | 2 | 3 | 1 | 11.80 | 1.90 | 14.58 | 9  | 4.75 | 0.53 | 5.12 |
| 3 | 2 | 2 | 3 | 2 | 8.60  | 2.00 | 11.55 | 6  | 3.71 | 0.62 | 4.45 |
| 3 | 2 | 2 | 3 | 3 | 9.40  | 1.80 | 9.02  | 5  | 2.90 | 0.58 | 4.08 |
| 3 | 2 | 2 | 3 | 4 | 17.90 | 1.90 | 21.28 | 11 | 6.70 | 0.61 | 9.62 |
| 3 | 2 | 2 | 3 | 5 | 10.90 | 1.83 | 10.74 | 4  | 1.45 | 0.36 | 4.64 |
| 3 | 2 | 2 | 3 | 6 | 12.00 | 1.79 | 12.51 | 6  | 3.87 | 0.65 | 4.95 |
| 3 | 2 | 2 | 3 | 7 | 11.80 | 1.75 | 13.86 | 8  | 4.56 | 0.57 | 5.41 |
| 3 | 2 | 2 | 3 | 8 | 14.80 | 2.00 | 17.72 | 10 | 5.59 | 0.56 | 8.56 |
| 3 | 2 | 3 | 1 | 1 | 15.50 | 1.84 | 18.83 | 13 | 5.93 | 0.46 | 7.61 |
| 3 | 2 | 3 | 1 | 2 | 13.90 | 1.90 | 13.95 | 9  | 4.92 | 0.55 | 4.04 |
| 3 | 2 | 3 | 1 | 3 | 12.10 | 1.70 | 13.17 | 8  | 3.80 | 0.48 | 5.11 |
| 3 | 2 | 3 | 1 | 4 | 12.10 | 1.95 | 14.37 | 9  | 4.78 | 0.53 | 5.11 |
| 3 | 2 | 3 | 1 | 5 | 12.20 | 2.05 | 16.10 | 9  | 5.40 | 0.60 | 5.27 |
| 3 | 2 | 3 | 1 | 6 | 11.40 | 1.85 | 13.08 | 9  | 4.54 | 0.50 | 5.09 |

|   |   |   |   |   |       |      |       |    |      |      |      |
|---|---|---|---|---|-------|------|-------|----|------|------|------|
| 3 | 2 | 3 | 1 | 7 | 11.60 | 1.70 | 9.72  | 6  | 2.58 | 0.43 | 4.11 |
| 3 | 2 | 3 | 1 | 8 | 13.20 | 1.89 | 13.77 | 9  | 4.61 | 0.51 | 5.80 |
| 3 | 2 | 3 | 2 | 1 | 15.50 | 1.80 | 15.87 | 11 | 4.83 | 0.44 | 5.11 |
| 3 | 2 | 3 | 2 | 2 | 11.10 | 1.70 | 10.30 | 7  | 3.40 | 0.49 | 3.53 |
| 3 | 2 | 3 | 2 | 3 | 12.20 | 1.81 | 10.64 | 5  | 2.39 | 0.48 | 3.68 |
| 3 | 2 | 3 | 2 | 4 | 13.10 | 1.84 | 14.79 | 9  | 4.60 | 0.51 | 4.73 |
| 3 | 2 | 3 | 2 | 5 | 11.60 | 2.05 | 13.99 | 8  | 4.09 | 0.51 | 5.13 |
| 3 | 2 | 3 | 2 | 6 | 11.60 | 1.56 | 10.57 | 7  | 3.24 | 0.46 | 4.00 |
| 3 | 2 | 3 | 2 | 7 | 14.20 | 1.80 | 12.55 | 7  | 3.37 | 0.48 | 5.65 |
| 3 | 2 | 3 | 2 | 8 | 12.20 | 1.95 | 12.72 | 6  | 3.68 | 0.61 | 5.15 |
| 3 | 2 | 3 | 3 | 1 | 13.00 | 2.10 | 10.75 | 2  | 0.93 | 0.47 | 3.71 |
| 3 | 2 | 3 | 3 | 2 | 17.30 | 2.09 | 22.75 | 11 | 6.08 | 0.55 | 8.13 |
| 3 | 2 | 3 | 3 | 3 | 12.80 | 1.90 | 14.03 | 7  | 3.00 | 0.43 | 5.36 |
| 3 | 2 | 3 | 3 | 4 | 12.60 | 1.60 | 8.32  | 11 | 4.58 | 0.42 | 8.07 |
| 3 | 2 | 3 | 3 | 5 | 16.00 | 2.13 | 17.80 | 10 | 5.89 | 0.59 | 4.28 |
| 3 | 2 | 3 | 3 | 6 | 14.20 | 1.80 | 13.72 | 8  | 3.27 | 0.41 | 5.39 |
| 3 | 2 | 3 | 3 | 7 | 12.90 | 2.09 | 15.51 | 8  | 4.37 | 0.55 | 5.78 |
| 3 | 2 | 3 | 3 | 8 | 13.60 | 1.65 | 9.20  | 5  | 0.97 | 0.19 | 4.58 |
| 3 | 2 | 4 | 1 | 1 | 12.80 | 2.00 | 13.94 | 5  | 2.46 | 0.49 | 5.86 |
| 3 | 2 | 4 | 1 | 2 | 9.00  | 1.85 | 8.26  | 5  | 2.51 | 0.50 | 7.30 |
| 3 | 2 | 4 | 1 | 3 | 12.20 | 2.10 | 15.61 | 4  | 1.40 | 0.35 | 9.36 |
| 3 | 2 | 4 | 1 | 4 | 15.40 | 2.09 | 15.52 | 5  | 1.36 | 0.27 | 3.56 |
| 3 | 2 | 4 | 1 | 5 | 10.40 | 1.80 | 8.52  | 3  | 1.50 | 0.50 | 4.68 |
| 3 | 2 | 4 | 1 | 6 | 10.10 | 2.10 | 10.72 | 5  | 1.36 | 0.27 | 5.15 |
| 3 | 2 | 4 | 1 | 7 | 7.00  | 2.15 | 7.31  | 4  | 0.58 | 0.15 | 2.83 |
| 3 | 2 | 4 | 1 | 8 | 7.60  | 1.74 | 4.93  | 2  | 1.09 | 0.55 | 2.60 |
| 3 | 2 | 4 | 2 | 1 | 12.30 | 1.75 | 7.35  | 2  | 1.50 | 0.75 | 4.78 |
| 3 | 2 | 4 | 2 | 2 | 14.20 | 1.93 | 12.52 | 1  | 0.37 | 0.37 | 1.86 |
| 3 | 2 | 4 | 2 | 3 | 10.80 | 1.75 | 7.81  | 2  | 1.17 | 0.59 | 5.40 |
| 3 | 2 | 4 | 2 | 4 | 7.80  | 1.90 | 7.72  | 1  | 0.60 | 0.60 | 4.83 |
| 3 | 2 | 4 | 2 | 5 | 11.00 | 1.80 | 9.17  | 4  | 2.33 | 0.58 | 5.87 |
| 3 | 2 | 4 | 2 | 6 | 9.50  | 1.65 | 6.45  | 3  | 0.67 | 0.22 | 6.44 |
| 3 | 2 | 4 | 2 | 7 | 8.80  | 2.05 | 8.49  | 2  | 0.58 | 0.29 | 4.92 |
| 3 | 2 | 4 | 2 | 8 | 8.30  | 2.00 | 7.44  | 7  | 4.24 | 0.61 | 8.76 |
| 3 | 2 | 4 | 3 | 1 | 11.30 | 1.80 | 7.90  | 2  | 1.84 | 0.92 | 5.66 |
| 3 | 2 | 4 | 3 | 2 | 10.30 | 1.94 | 10.18 | 5  | 2.45 | 0.49 | 7.34 |



|   |   |   |   |   |       |      |       |    |      |      |       |
|---|---|---|---|---|-------|------|-------|----|------|------|-------|
| 3 | 2 | 4 | 3 | 3 | 8.60  | 1.95 | 8.44  | 3  | 2.46 | 0.82 | 5.60  |
| 3 | 2 | 4 | 3 | 4 | 7.50  | 1.73 | 7.86  | 4  | 1.50 | 0.38 | 4.58  |
| 3 | 2 | 4 | 3 | 5 | 10.40 | 1.90 | 10.49 | 5  | 1.88 | 0.38 | 4.66  |
| 3 | 2 | 4 | 3 | 6 | 11.50 | 2.05 | 11.22 | 5  | 2.36 | 0.47 | 6.01  |
| 3 | 2 | 4 | 3 | 7 | 13.00 | 2.05 | 12.79 | 6  | 1.72 | 0.29 | 8.10  |
| 3 | 2 | 4 | 3 | 8 | 8.60  | 1.94 | 7.48  | 4  | 1.17 | 0.29 | 4.82  |
| 3 | 2 | 5 | 1 | 1 | 17.90 | 1.80 | 14.05 | 8  | 3.33 | 0.42 | 2.82  |
| 3 | 2 | 5 | 1 | 2 | 16.40 | 1.90 | 15.33 | 6  | 2.56 | 0.43 | 5.89  |
| 3 | 2 | 5 | 1 | 3 | 16.20 | 1.85 | 12.90 | 6  | 4.06 | 0.68 | 1.98  |
| 3 | 2 | 5 | 1 | 4 | 13.90 | 2.00 | 10.59 | 4  | 2.12 | 0.53 | 5.23  |
| 3 | 2 | 5 | 1 | 5 | 16.60 | 1.85 | 12.84 | 3  | 1.29 | 0.43 | 3.27  |
| 3 | 2 | 5 | 1 | 6 | 19.10 | 2.05 | 13.34 | 2  | 1.10 | 0.55 | 5.91  |
| 3 | 2 | 5 | 1 | 7 | 20.00 | 1.99 | 13.74 | 1  | 0.76 | 0.76 | 6.73  |
| 3 | 2 | 5 | 1 | 8 | 13.90 | 1.90 | 8.98  | 2  | 1.21 | 0.61 | 4.34  |
| 3 | 2 | 5 | 2 | 1 | 18.20 | 1.94 | 17.75 | 6  | 4.08 | 0.68 | 4.70  |
| 3 | 2 | 5 | 2 | 2 | 15.40 | 1.95 | 12.49 | 5  | 3.13 | 0.63 | 3.98  |
| 3 | 2 | 5 | 2 | 3 | 16.00 | 2.20 | 11.59 | 7  | 3.84 | 0.55 | 4.75  |
| 3 | 2 | 5 | 2 | 4 | 21.20 | 2.00 | 17.77 | 8  | 4.05 | 0.51 | 6.26  |
| 3 | 2 | 5 | 2 | 5 | 20.80 | 1.89 | 15.79 | 7  | 4.28 | 0.61 | 3.75  |
| 3 | 2 | 5 | 2 | 6 | 19.70 | 1.96 | 20.35 | 6  | 4.16 | 0.69 | 1.55  |
| 3 | 2 | 5 | 2 | 7 | 13.50 | 1.90 | 12.60 | 3  | 1.76 | 0.59 | 2.17  |
| 3 | 2 | 5 | 2 | 8 | 12.50 | 1.89 | 10.26 | 3  | 2.09 | 0.70 | 2.20  |
| 3 | 2 | 5 | 3 | 1 | 15.10 | 1.95 | 13.97 | 7  | 3.27 | 0.47 | 7.52  |
| 3 | 2 | 5 | 3 | 2 | 12.40 | 1.80 | 10.49 | 5  | 2.51 | 0.50 | 4.84  |
| 3 | 2 | 5 | 3 | 3 | 18.60 | 2.09 | 15.82 | 5  | 2.13 | 0.43 | 5.15  |
| 3 | 2 | 5 | 3 | 4 | 18.20 | 1.90 | 15.75 | 9  | 4.29 | 0.48 | 5.39  |
| 3 | 2 | 5 | 3 | 5 | 23.50 | 2.09 | 22.46 | 10 | 4.19 | 0.42 | 5.73  |
| 3 | 2 | 5 | 3 | 6 | 12.30 | 1.80 | 6.11  | 9  | 4.86 | 0.54 | 8.49  |
| 3 | 2 | 5 | 3 | 7 | 11.80 | 1.89 | 6.91  | 5  | 2.50 | 0.50 | 4.59  |
| 3 | 2 | 5 | 3 | 8 | 9.40  | 1.75 | 6.45  | 5  | 1.77 | 0.35 | 4.41  |
| 3 | 2 | 6 | 1 | 1 | 15.30 | 1.89 | 16.25 | 10 | 5.28 | 0.53 | 7.40  |
| 3 | 2 | 6 | 1 | 2 | 13.40 | 1.81 | 16.88 | 8  | 5.97 | 0.75 | 6.38  |
| 3 | 2 | 6 | 1 | 3 | 16.40 | 2.04 | 11.39 | 8  | 6.07 | 0.76 | 7.60  |
| 3 | 2 | 6 | 1 | 4 | 15.30 | 1.64 | 19.29 | 9  | 6.52 | 0.72 | 7.89  |
| 3 | 2 | 6 | 1 | 5 | 12.80 | 2.00 | 13.29 | 7  | 4.99 | 0.71 | 6.60  |
| 3 | 2 | 6 | 1 | 6 | 15.20 | 2.09 | 21.16 | 7  | 5.60 | 0.80 | 11.87 |

|   |   |   |   |   |       |      |       |    |       |      |       |
|---|---|---|---|---|-------|------|-------|----|-------|------|-------|
| 3 | 2 | 6 | 1 | 7 | 14.90 | 1.79 | 21.21 | 10 | 7.46  | 0.75 | 6.53  |
| 3 | 2 | 6 | 1 | 8 | 10.80 | 1.69 | 14.28 | 7  | 5.74  | 0.82 | 5.11  |
| 3 | 2 | 6 | 2 | 1 | 11.90 | 1.89 | 13.12 | 7  | 3.47  | 0.50 | 4.68  |
| 3 | 2 | 6 | 2 | 2 | 12.80 | 1.80 | 15.97 | 7  | 5.92  | 0.85 | 7.56  |
| 3 | 2 | 6 | 2 | 3 | 16.40 | 2.15 | 26.01 | 12 | 9.70  | 0.81 | 9.36  |
| 3 | 2 | 6 | 2 | 4 | 14.60 | 2.14 | 22.47 | 11 | 7.22  | 0.66 | 7.67  |
| 3 | 2 | 6 | 2 | 5 | 18.00 | 1.99 | 24.07 | 13 | 9.06  | 0.70 | 7.58  |
| 3 | 2 | 6 | 2 | 6 | 15.60 | 1.75 | 22.09 | 12 | 9.22  | 0.77 | 8.95  |
| 3 | 2 | 6 | 2 | 7 | 11.40 | 1.95 | 17.90 | 7  | 4.05  | 0.58 | 7.01  |
| 3 | 2 | 6 | 2 | 8 | 14.40 | 1.75 | 13.21 | 4  | 3.25  | 0.81 | 5.75  |
| 3 | 2 | 6 | 3 | 1 | 16.40 | 2.10 | 25.90 | 9  | 7.57  | 0.84 | 10.33 |
| 3 | 2 | 6 | 3 | 2 | 15.80 | 2.25 | 24.73 | 9  | 7.63  | 0.85 | 10.93 |
| 3 | 2 | 6 | 3 | 3 | 15.20 | 2.09 | 20.39 | 9  | 5.80  | 0.64 | 8.89  |
| 3 | 2 | 6 | 3 | 4 | 13.90 | 2.10 | 16.12 | 8  | 5.11  | 0.64 | 5.19  |
| 3 | 2 | 6 | 3 | 5 | 13.90 | 1.95 | 18.12 | 9  | 7.11  | 0.79 | 7.38  |
| 3 | 2 | 6 | 3 | 6 | 14.30 | 1.70 | 19.03 | 9  | 7.31  | 0.81 | 7.89  |
| 3 | 2 | 6 | 3 | 7 | 13.20 | 2.04 | 21.12 | 9  | 8.76  | 0.97 | 7.02  |
| 3 | 2 | 6 | 3 | 8 | 14.40 | 1.84 | 18.02 | 9  | 4.64  | 0.52 | 8.32  |
| 3 | 2 | 7 | 1 | 1 | 15.20 | 2.04 | 23.39 | 6  | 4.80  | 0.80 | 6.90  |
| 3 | 2 | 7 | 1 | 2 | 15.50 | 2.29 | 22.32 | 9  | 6.12  | 0.68 | 6.53  |
| 3 | 2 | 7 | 1 | 3 | 17.30 | 2.21 | 24.45 | 5  | 3.33  | 0.67 | 6.34  |
| 3 | 2 | 7 | 1 | 4 | 17.00 | 1.99 | 20.22 | 7  | 5.64  | 0.81 | 7.62  |
| 3 | 2 | 7 | 1 | 5 | 16.30 | 2.05 | 19.30 | 7  | 5.72  | 0.82 | 5.28  |
| 3 | 2 | 7 | 1 | 6 | 19.00 | 2.20 | 22.25 | 9  | 6.20  | 0.69 | 8.03  |
| 3 | 2 | 7 | 1 | 7 | 15.50 | 2.10 | 23.11 | 5  | 4.83  | 0.97 | 4.10  |
| 3 | 2 | 7 | 1 | 8 | 16.20 | 2.10 | 22.93 | 7  | 5.88  | 0.84 | 5.33  |
| 3 | 2 | 7 | 2 | 1 | 14.00 | 2.15 | 17.78 | 13 | 12.16 | 0.94 | 9.54  |
| 3 | 2 | 7 | 2 | 2 | 16.20 | 2.00 | 19.46 | 5  | 3.93  | 0.79 | 4.36  |
| 3 | 2 | 7 | 2 | 3 | 16.40 | 2.10 | 17.71 | 8  | 6.60  | 0.83 | 8.67  |
| 3 | 2 | 7 | 2 | 4 | 15.20 | 2.05 | 19.84 | 6  | 3.28  | 0.55 | 7.18  |
| 3 | 2 | 7 | 2 | 5 | 11.50 | 2.09 | 14.50 | 9  | 6.84  | 0.76 | 7.27  |
| 3 | 2 | 7 | 2 | 6 | 12.20 | 1.65 | 14.03 | 8  | 7.32  | 0.92 | 9.88  |
| 3 | 2 | 7 | 2 | 7 | 17.60 | 2.10 | 27.02 | 3  | 3.01  | 1.00 | 7.04  |
| 3 | 2 | 7 | 2 | 8 | 8.60  | 1.70 | 6.34  | 2  | 2.10  | 1.05 | 4.00  |
| 3 | 2 | 7 | 3 | 1 | 10.90 | 1.90 | 11.11 | 10 | 7.04  | 0.70 | 8.38  |
| 3 | 2 | 7 | 3 | 2 | 18.70 | 1.90 | 28.42 | 12 | 8.71  | 0.73 | 8.53  |

|   |   |   |   |   |       |      |       |    |      |      |       |
|---|---|---|---|---|-------|------|-------|----|------|------|-------|
| 3 | 2 | 7 | 3 | 3 | 14.30 | 2.00 | 18.75 | 11 | 7.89 | 0.72 | 10.74 |
| 3 | 2 | 7 | 3 | 4 | 12.50 | 2.05 | 16.43 | 6  | 2.50 | 0.42 | 9.59  |
| 3 | 2 | 7 | 3 | 5 | 12.20 | 1.95 | 16.62 | 7  | 4.74 | 0.68 | 7.52  |
| 3 | 2 | 7 | 3 | 6 | 17.40 | 2.19 | 25.30 | 8  | 5.89 | 0.74 | 8.02  |
| 3 | 2 | 7 | 3 | 7 | 9.40  | 2.05 | 13.12 | 11 | 7.27 | 0.66 | 8.38  |
| 3 | 2 | 7 | 3 | 8 | 8.70  | 1.70 | 6.14  | 7  | 6.74 | 0.96 | 9.27  |
| 3 | 2 | 8 | 1 | 1 | 11.20 | 1.80 | 13.21 | 10 | 3.72 | 0.37 | 6.55  |
| 3 | 2 | 8 | 1 | 2 | 12.50 | 1.90 | 12.34 | 9  | 3.53 | 0.39 | 6.80  |
| 3 | 2 | 8 | 1 | 3 | 15.30 | 1.95 | 18.60 | 9  | 5.10 | 0.57 | 8.76  |
| 3 | 2 | 8 | 1 | 4 | 14.60 | 1.93 | 18.03 | 9  | 4.50 | 0.50 | 10.19 |
| 3 | 2 | 8 | 1 | 5 | 14.30 | 2.05 | 17.01 | 9  | 5.28 | 0.59 | 8.40  |
| 3 | 2 | 8 | 1 | 6 | 9.20  | 1.85 | 11.00 | 8  | 3.62 | 0.45 | 6.62  |
| 3 | 2 | 8 | 1 | 7 | 11.00 | 1.95 | 14.76 | 8  | 5.26 | 0.66 | 6.23  |
| 3 | 2 | 8 | 1 | 8 | 8.30  | 1.70 | 8.20  | 4  | 1.80 | 0.45 | 3.70  |
| 3 | 2 | 8 | 2 | 1 | 13.50 | 1.70 | 15.93 | 11 | 5.68 | 0.52 | 6.46  |
| 3 | 2 | 8 | 2 | 2 | 15.20 | 2.05 | 18.50 | 9  | 5.17 | 0.57 | 7.96  |
| 3 | 2 | 8 | 2 | 3 | 13.70 | 1.79 | 15.05 | 13 | 6.76 | 0.52 | 6.67  |
| 3 | 2 | 8 | 2 | 4 | 11.90 | 1.95 | 17.14 | 10 | 5.71 | 0.57 | 9.35  |
| 3 | 2 | 8 | 2 | 5 | 10.70 | 1.70 | 14.27 | 9  | 5.24 | 0.58 | 7.27  |
| 3 | 2 | 8 | 2 | 6 | 16.20 | 1.60 | 20.89 | 10 | 5.72 | 0.57 | 10.61 |
| 3 | 2 | 8 | 2 | 7 | 11.90 | 1.85 | 13.67 | 11 | 5.30 | 0.48 | 5.77  |
| 3 | 2 | 8 | 2 | 8 | 11.80 | 1.79 | 13.20 | 8  | 4.11 | 0.51 | 6.57  |
| 3 | 2 | 8 | 3 | 1 | 12.60 | 1.93 | 14.40 | 8  | 4.50 | 0.56 | 6.62  |
| 3 | 2 | 8 | 3 | 2 | 11.70 | 2.34 | 14.46 | 8  | 3.95 | 0.49 | 5.75  |
| 3 | 2 | 8 | 3 | 3 | 12.20 | 1.60 | 13.93 | 10 | 4.66 | 0.47 | 4.83  |
| 3 | 2 | 8 | 3 | 4 | 10.10 | 1.70 | 10.15 | 5  | 2.64 | 0.53 | 4.48  |
| 3 | 2 | 8 | 3 | 5 | 13.00 | 2.05 | 15.52 | 9  | 4.84 | 0.54 | 7.01  |
| 3 | 2 | 8 | 3 | 6 | 15.50 | 1.97 | 18.36 | 11 | 6.06 | 0.55 | 7.94  |
| 3 | 2 | 8 | 3 | 7 | 14.20 | 2.20 | 17.46 | 10 | 6.05 | 0.61 | 8.67  |
| 3 | 2 | 8 | 3 | 8 | 11.30 | 1.65 | 12.35 | 10 | 5.06 | 0.51 | 6.07  |
| 3 | 2 | 9 | 1 | 1 | 14.60 | 2.25 | 22.91 | 5  | 4.01 | 0.80 | 6.09  |
| 3 | 2 | 9 | 1 | 2 | 15.90 | 2.09 | 24.99 | 4  | 3.12 | 0.78 | 5.72  |
| 3 | 2 | 9 | 1 | 3 | 15.80 | 2.25 | 16.25 | 6  | 4.54 | 0.76 | 6.22  |
| 3 | 2 | 9 | 1 | 4 | 17.40 | 2.35 | 25.64 | 8  | 6.15 | 0.77 | 13.03 |
| 3 | 2 | 9 | 1 | 5 | 13.80 | 2.55 | 22.77 | 11 | 6.02 | 0.55 | 13.43 |
| 3 | 2 | 9 | 1 | 6 | 12.80 | 2.44 | 14.81 | 6  | 5.06 | 0.84 | 8.00  |

|   |   |    |   |   |       |      |       |    |      |      |       |
|---|---|----|---|---|-------|------|-------|----|------|------|-------|
| 3 | 2 | 9  | 1 | 7 | 17.50 | 2.24 | 20.41 | 10 | 8.55 | 0.86 | 15.81 |
| 3 | 2 | 9  | 1 | 8 | 13.50 | 2.04 | 13.12 | 5  | 4.08 | 0.82 | 8.56  |
| 3 | 2 | 9  | 2 | 1 | 17.60 | 2.09 | 20.63 | 8  | 6.02 | 0.75 | 9.65  |
| 3 | 2 | 9  | 2 | 2 | 11.10 | 1.96 | 13.50 | 6  | 4.57 | 0.76 | 12.43 |
| 3 | 2 | 9  | 2 | 3 | 18.70 | 2.01 | 29.12 | 2  | 1.08 | 0.54 | 7.42  |
| 3 | 2 | 9  | 2 | 4 | 12.90 | 2.10 | 13.70 | 11 | 7.55 | 0.69 | 12.97 |
| 3 | 2 | 9  | 2 | 5 | 12.60 | 1.80 | 13.69 | 6  | 5.03 | 0.84 | 10.55 |
| 3 | 2 | 9  | 2 | 6 | 14.10 | 2.10 | 15.94 | 5  | 4.06 | 0.81 | 8.64  |
| 3 | 2 | 9  | 2 | 7 | 17.10 | 2.70 | 31.02 | 9  | 5.85 | 0.65 | 11.21 |
| 3 | 2 | 9  | 2 | 8 | 12.10 | 2.00 | 17.72 | 5  | 4.35 | 0.87 | 6.58  |
| 3 | 2 | 9  | 3 | 1 | 12.70 | 2.40 | 24.50 | 10 | 6.80 | 0.68 | 9.06  |
| 3 | 2 | 9  | 3 | 2 | 14.70 | 2.10 | 17.71 | 7  | 5.00 | 0.71 | 9.18  |
| 3 | 2 | 9  | 3 | 3 | 16.20 | 2.60 | 27.17 | 9  | 8.11 | 0.90 | 12.67 |
| 3 | 2 | 9  | 3 | 4 | 9.70  | 2.05 | 10.48 | 4  | 3.17 | 0.79 | 4.89  |
| 3 | 2 | 9  | 3 | 5 | 12.40 | 2.25 | 19.84 | 8  | 5.92 | 0.74 | 8.53  |
| 3 | 2 | 9  | 3 | 6 | 14.60 | 1.95 | 18.32 | 10 | 5.41 | 0.54 | 7.12  |
| 3 | 2 | 9  | 3 | 7 | 10.70 | 2.10 | 14.38 | 5  | 3.64 | 0.73 | 6.33  |
| 3 | 2 | 9  | 3 | 8 | 11.10 | 1.90 | 9.49  | 4  | 3.09 | 0.77 | 4.97  |
| 3 | 2 | 10 | 1 | 1 | 10.90 | 1.70 | 16.23 | 9  | 5.34 | 0.59 | 5.50  |
| 3 | 2 | 10 | 1 | 2 | 14.30 | 2.00 | 18.12 | 10 | 5.18 | 0.52 | 7.85  |
| 3 | 2 | 10 | 1 | 3 | 15.60 | 1.95 | 17.14 | 10 | 5.53 | 0.55 | 7.08  |
| 3 | 2 | 10 | 1 | 4 | 13.30 | 1.85 | 20.57 | 8  | 2.77 | 0.35 | 9.18  |
| 3 | 2 | 10 | 1 | 5 | 8.90  | 2.10 | 14.25 | 8  | 4.45 | 0.56 | 5.42  |
| 3 | 2 | 10 | 1 | 6 | 15.80 | 2.00 | 25.40 | 5  | 2.23 | 0.45 | 3.48  |
| 3 | 2 | 10 | 1 | 7 | 13.00 | 2.10 | 9.12  | 14 | 8.65 | 0.62 | 7.76  |
| 3 | 2 | 10 | 1 | 8 | 15.00 | 2.14 | 21.89 | 9  | 5.53 | 0.61 | 2.35  |
| 3 | 2 | 10 | 2 | 1 | 13.00 | 1.90 | 11.91 | 13 | 7.96 | 0.61 | 7.58  |
| 3 | 2 | 10 | 2 | 2 | 12.60 | 2.10 | 17.45 | 11 | 7.24 | 0.66 | 8.06  |
| 3 | 2 | 10 | 2 | 3 | 13.40 | 1.95 | 20.70 | 13 | 6.78 | 0.52 | 5.83  |
| 3 | 2 | 10 | 2 | 4 | 15.50 | 2.04 | 15.90 | 8  | 4.58 | 0.57 | 5.70  |
| 3 | 2 | 10 | 2 | 5 | 12.00 | 1.80 | 13.58 | 9  | 5.20 | 0.58 | 5.94  |
| 3 | 2 | 10 | 2 | 6 | 16.60 | 2.15 | 21.05 | 9  | 4.20 | 0.47 | 6.35  |
| 3 | 2 | 10 | 2 | 7 | 8.70  | 1.55 | 20.26 | 13 | 6.38 | 0.49 | 6.45  |
| 3 | 2 | 10 | 2 | 8 | 15.00 | 2.25 | 20.57 | 11 | 4.85 | 0.44 | 2.27  |
| 3 | 2 | 10 | 3 | 1 | 14.20 | 1.85 | 20.66 | 9  | 4.67 | 0.52 | 3.75  |
| 3 | 2 | 10 | 3 | 2 | 13.30 | 1.99 | 17.24 | 10 | 5.66 | 0.57 | 7.00  |

|   |   |    |   |   |       |      |       |    |       |      |      |
|---|---|----|---|---|-------|------|-------|----|-------|------|------|
| 3 | 2 | 10 | 3 | 3 | 13.90 | 1.90 | 17.47 | 14 | 7.62  | 0.54 | 7.95 |
| 3 | 2 | 10 | 3 | 4 | 11.80 | 1.90 | 13.76 | 10 | 5.73  | 0.57 | 6.58 |
| 3 | 2 | 10 | 3 | 5 | 11.70 | 1.80 | 13.58 | 6  | 3.86  | 0.64 | 5.04 |
| 3 | 2 | 10 | 3 | 6 | 12.10 | 1.80 | 14.36 | 14 | 7.56  | 0.54 | 7.56 |
| 3 | 2 | 10 | 3 | 7 | 13.50 | 1.80 | 17.50 | 13 | 7.17  | 0.55 | 7.19 |
| 3 | 2 | 10 | 3 | 8 | 12.20 | 1.75 | 13.30 | 12 | 7.58  | 0.63 | 8.08 |
| 3 | 2 | 13 | 1 | 1 | 10.60 | 1.95 | 12.28 | 6  | 4.97  | 0.83 | 3.52 |
| 3 | 2 | 13 | 1 | 2 | 8.30  | 1.95 | 9.78  | 5  | 3.76  | 0.75 | 5.56 |
| 3 | 2 | 13 | 1 | 3 | 13.60 | 1.85 | 15.01 | 4  | 2.88  | 0.72 | 2.50 |
| 3 | 2 | 13 | 1 | 4 | 12.20 | 2.10 | 14.37 | 5  | 4.17  | 0.83 | 7.15 |
| 3 | 2 | 13 | 1 | 5 | 13.60 | 1.95 | 14.68 | 4  | 3.61  | 0.90 | 3.58 |
| 3 | 2 | 13 | 1 | 6 | 14.60 | 2.00 | 18.72 | 8  | 7.31  | 0.91 | 6.42 |
| 3 | 2 | 13 | 1 | 7 | 12.50 | 2.05 | 15.58 | 7  | 5.04  | 0.72 | 5.83 |
| 3 | 2 | 13 | 1 | 8 | 11.50 | 1.95 | 12.54 | 5  | 2.73  | 0.55 | 3.72 |
| 3 | 2 | 13 | 2 | 1 | 14.30 | 1.95 | 17.22 | 9  | 6.98  | 0.78 | 4.13 |
| 3 | 2 | 13 | 2 | 2 | 13.70 | 2.10 | 17.03 | 5  | 4.66  | 0.93 | 5.60 |
| 3 | 2 | 13 | 2 | 3 | 12.70 | 1.99 | 14.34 | 6  | 4.62  | 0.77 | 5.04 |
| 3 | 2 | 13 | 2 | 4 | 12.50 | 2.05 | 15.90 | 8  | 6.58  | 0.82 | 4.60 |
| 3 | 2 | 13 | 2 | 5 | 13.20 | 1.90 | 14.16 | 7  | 3.14  | 0.45 | 3.28 |
| 3 | 2 | 13 | 2 | 6 | 12.80 | 2.00 | 15.91 | 7  | 3.52  | 0.50 | 2.57 |
| 3 | 2 | 13 | 2 | 7 | 13.40 | 2.05 | 15.50 | 11 | 7.40  | 0.67 | 5.39 |
| 3 | 2 | 13 | 2 | 8 | 14.20 | 1.85 | 17.99 | 6  | 4.18  | 0.70 | 5.22 |
| 3 | 2 | 13 | 3 | 1 | 12.10 | 2.19 | 17.86 | 2  | 1.07  | 0.54 | 0.27 |
| 3 | 2 | 13 | 3 | 2 | 14.00 | 2.05 | 19.62 | 9  | 7.61  | 0.85 | 5.71 |
| 3 | 2 | 13 | 3 | 3 | 14.40 | 2.20 | 23.53 | 8  | 7.39  | 0.92 | 5.92 |
| 3 | 2 | 13 | 3 | 4 | 13.10 | 2.05 | 16.57 | 8  | 8.25  | 1.03 | 5.66 |
| 3 | 2 | 13 | 3 | 5 | 12.30 | 2.20 | 16.43 | 7  | 6.42  | 0.92 | 6.82 |
| 3 | 2 | 13 | 3 | 6 | 14.20 | 2.14 | 18.52 | 9  | 8.07  | 0.90 | 6.59 |
| 3 | 2 | 13 | 3 | 7 | 12.90 | 2.00 | 17.23 | 10 | 9.17  | 0.92 | 7.70 |
| 3 | 2 | 13 | 3 | 8 | 7.30  | 1.95 | 5.37  | 11 | 10.75 | 0.98 | 8.53 |
| 3 | 2 | 29 | 1 | 1 | 11.80 | 1.60 | 9.81  | 7  | 3.15  | 0.45 | 3.87 |
| 3 | 2 | 29 | 1 | 2 | 12.00 | 1.60 | 10.30 | 7  | 3.83  | 0.55 | 3.26 |
| 3 | 2 | 29 | 1 | 3 | 9.70  | 1.50 | 5.95  | 5  | 1.24  | 0.25 | 2.72 |
| 3 | 2 | 29 | 1 | 4 | 12.00 | 1.65 | 10.40 | 7  | 3.86  | 0.55 | 3.67 |
| 3 | 2 | 29 | 1 | 5 | 12.50 | 1.55 | 10.24 | 8  | 3.62  | 0.45 | 3.44 |
| 3 | 2 | 29 | 1 | 6 | 8.70  | 1.35 | 4.30  | 3  | 6.99  | 2.33 | 1.89 |

|   |   |    |   |   |       |      |       |    |      |      |      |
|---|---|----|---|---|-------|------|-------|----|------|------|------|
| 3 | 2 | 29 | 1 | 7 | 11.10 | 1.55 | 8.08  | 7  | 2.70 | 0.39 | 2.92 |
| 3 | 2 | 29 | 1 | 8 | 8.00  | 1.50 | 5.17  | 5  | 1.89 | 0.38 | 1.64 |
| 3 | 2 | 29 | 2 | 1 | 12.50 | 1.75 | 13.24 | 9  | 4.95 | 0.55 | 4.18 |
| 3 | 2 | 29 | 2 | 2 | 11.00 | 1.80 | 9.57  | 7  | 3.63 | 0.52 | 2.91 |
| 3 | 2 | 29 | 2 | 3 | 12.60 | 1.55 | 10.25 | 10 | 4.07 | 0.41 | 3.08 |
| 3 | 2 | 29 | 2 | 4 | 10.50 | 1.40 | 4.93  | 3  | 1.27 | 0.42 | 5.20 |
| 3 | 2 | 29 | 2 | 5 | 10.00 | 1.55 | 6.72  | 2  | 0.87 | 0.44 | 3.49 |
| 3 | 2 | 29 | 2 | 6 | 10.50 | 1.60 | 7.09  | 4  | 1.77 | 0.44 | 2.95 |
| 3 | 2 | 29 | 2 | 7 | 9.00  | 1.65 | 7.59  | 5  | 2.64 | 0.53 | 3.00 |
| 3 | 2 | 29 | 2 | 8 | 7.00  | 1.45 | 3.74  | 2  | 1.09 | 0.55 | 2.14 |
| 3 | 2 | 29 | 3 | 1 | 13.20 | 1.65 | 11.48 | 6  | 3.15 | 0.53 | 4.82 |
| 3 | 2 | 29 | 3 | 2 | 8.40  | 1.65 | 5.21  | 4  | 1.01 | 0.25 | 2.41 |
| 3 | 2 | 29 | 3 | 3 | 12.60 | 1.70 | 9.24  | 6  | 3.17 | 0.53 | 3.49 |
| 3 | 2 | 29 | 3 | 4 | 12.90 | 1.55 | 11.04 | 6  | 3.22 | 0.54 | 4.23 |
| 3 | 2 | 29 | 3 | 5 | 8.30  | 1.50 | 6.70  | 6  | 2.48 | 0.41 | 2.30 |
| 3 | 2 | 29 | 3 | 6 | 12.00 | 1.60 | 8.78  | 6  | 2.96 | 0.49 | 3.06 |
| 3 | 2 | 29 | 3 | 7 | 9.20  | 1.40 | 4.75  | 2  | 0.92 | 0.46 | 1.82 |
| 3 | 2 | 29 | 3 | 8 | 8.40  | 1.65 | 4.78  | 3  | 0.65 | 0.22 | 2.50 |
| 3 | 2 | 26 | 1 | 1 | 10.70 | 1.95 | 12.23 | 7  | 4.24 | 0.61 | 4.14 |
| 3 | 2 | 26 | 1 | 2 | 12.50 | 1.80 | 12.52 | 7  | 3.06 | 0.44 | 4.65 |
| 3 | 2 | 26 | 1 | 3 | 11.90 | 1.65 | 8.20  | 5  | 0.77 | 0.15 | 2.60 |
| 3 | 2 | 26 | 1 | 4 | 12.70 | 1.75 | 12.78 | 6  | 3.13 | 0.52 | 4.58 |
| 3 | 2 | 26 | 1 | 5 | 10.50 | 1.65 | 7.76  | 4  | 1.84 | 0.46 | 3.01 |
| 3 | 2 | 26 | 1 | 6 | 8.70  | 1.65 | 6.30  | 5  | 1.81 | 0.36 | 2.16 |
| 3 | 2 | 26 | 1 | 7 | 9.60  | 1.50 | 5.46  | 3  | 0.87 | 0.29 | 2.27 |
| 3 | 2 | 26 | 1 | 8 | 10.90 | 1.60 | 6.58  | 3  | 1.37 | 0.46 | 2.73 |
| 3 | 2 | 26 | 2 | 1 | 13.50 | 1.80 | 11.06 | 7  | 3.01 | 0.43 | 4.20 |
| 3 | 2 | 26 | 2 | 2 | 13.00 | 1.90 | 10.74 | 6  | 1.37 | 0.23 | 4.63 |
| 3 | 2 | 26 | 2 | 3 | 13.30 | 1.70 | 11.54 | 8  | 3.13 | 0.39 | 3.94 |
| 3 | 2 | 26 | 2 | 4 | 10.60 | 1.85 | 8.03  | 2  | 1.16 | 0.58 | 3.39 |
| 3 | 2 | 26 | 2 | 5 | 13.30 | 1.85 | 15.60 | 11 | 5.22 | 0.47 | 4.97 |
| 3 | 2 | 26 | 2 | 6 | 11.00 | 1.70 | 7.89  | 4  | 1.53 | 0.38 | 3.30 |
| 3 | 2 | 26 | 2 | 7 | 10.00 | 1.55 | 8.14  | 6  | 1.66 | 0.28 | 3.15 |
| 3 | 2 | 26 | 2 | 8 | 10.90 | 1.75 | 9.23  | 6  | 2.33 | 0.39 | 3.23 |
| 3 | 2 | 26 | 3 | 1 | 18.80 | 1.60 | 10.89 | 8  | 3.16 | 0.40 | 3.14 |
| 3 | 2 | 26 | 3 | 2 | 11.70 | 1.80 | 18.81 | 8  | 2.30 | 0.29 | 3.60 |

|   |   |    |   |   |       |      |       |    |      |      |      |
|---|---|----|---|---|-------|------|-------|----|------|------|------|
| 3 | 2 | 26 | 3 | 3 | 12.90 | 1.65 | 11.78 | 10 | 3.92 | 0.39 | 6.21 |
| 3 | 2 | 26 | 3 | 4 | 8.70  | 1.75 | 5.05  | 2  | 0.78 | 0.39 | 2.01 |
| 3 | 2 | 26 | 3 | 5 | 11.20 | 1.60 | 7.09  | 6  | 1.68 | 0.28 | 2.64 |
| 3 | 2 | 26 | 3 | 6 | 12.20 | 1.60 | 8.17  | 8  | 2.20 | 0.28 | 2.62 |
| 3 | 2 | 26 | 3 | 7 | 9.10  | 1.70 | 8.21  | 6  | 2.76 | 0.46 | 2.37 |
| 3 | 2 | 26 | 3 | 8 | 8.40  | 1.60 | 5.09  | 4  | 1.04 | 0.26 | 1.90 |
| 3 | 2 | 25 | 1 | 1 | 9.00  | 1.80 | 8.93  | 4  | 2.20 | 0.55 | 4.20 |
| 3 | 2 | 25 | 1 | 2 | 14.40 | 1.90 | 12.63 | 6  | 2.48 | 0.41 | 6.16 |
| 3 | 2 | 25 | 1 | 3 | 13.60 | 1.85 | 11.88 | 5  | 2.40 | 0.48 | 6.07 |
| 3 | 2 | 25 | 1 | 4 | 9.50  | 1.85 | 8.54  | 3  | 1.62 | 0.54 | 4.62 |
| 3 | 2 | 25 | 1 | 5 | 9.70  | 1.60 | 8.30  | 6  | 2.60 | 0.43 | 3.55 |
| 3 | 2 | 25 | 1 | 6 | 10.80 | 1.60 | 7.00  | 5  | 1.86 | 0.37 | 2.80 |
| 3 | 2 | 25 | 1 | 7 | 10.50 | 1.70 | 9.18  | 4  | 1.82 | 0.46 | 2.72 |
| 3 | 2 | 25 | 1 | 8 | 6.00  | 1.90 | 6.62  | 5  | 2.85 | 0.57 | 3.50 |
| 3 | 2 | 25 | 2 | 1 | 12.60 | 1.80 | 10.47 | 7  | 2.53 | 0.36 | 4.50 |
| 3 | 2 | 25 | 2 | 2 | 10.50 | 1.60 | 9.90  | 3  | 1.30 | 0.43 | 4.11 |
| 3 | 2 | 25 | 2 | 3 | 14.50 | 2.05 | 16.04 | 7  | 4.23 | 0.60 | 7.07 |
| 3 | 2 | 25 | 2 | 4 | 12.00 | 1.70 | 7.12  | 2  | 0.70 | 0.35 | 2.65 |
| 3 | 2 | 25 | 2 | 5 | 8.90  | 1.80 | 9.07  | 4  | 1.50 | 0.38 | 4.48 |
| 3 | 2 | 25 | 2 | 6 | 10.80 | 1.85 | 9.50  | 6  | 2.72 | 0.45 | 4.06 |
| 3 | 2 | 25 | 2 | 7 | 13.00 | 1.90 | 11.77 | 6  | 3.12 | 0.52 | 5.11 |
| 3 | 2 | 25 | 2 | 8 | 12.20 | 1.80 | 6.40  | 3  | 1.78 | 0.59 | 2.46 |
| 3 | 2 | 25 | 3 | 1 | 16.20 | 1.95 | 20.06 | 5  | 6.80 | 1.36 | 4.70 |
| 3 | 2 | 25 | 3 | 2 | 13.70 | 1.80 | 13.67 | 3  | 3.49 | 1.16 | 4.75 |
| 3 | 2 | 25 | 3 | 3 | 12.20 | 2.00 | 14.67 | 3  | 4.08 | 1.36 | 3.30 |
| 3 | 2 | 25 | 3 | 4 | 11.40 | 2.00 | 11.45 | 4  | 6.48 | 1.62 | 5.48 |
| 3 | 2 | 25 | 3 | 5 | 12.80 | 1.60 | 12.25 | 4  | 4.44 | 1.11 | 3.18 |
| 3 | 2 | 25 | 3 | 6 | 11.20 | 1.70 | 9.40  | 4  | 3.67 | 0.92 | 4.20 |
| 3 | 2 | 25 | 3 | 7 | 14.50 | 1.85 | 15.45 | 5  | 0.30 | 0.06 | 4.44 |
| 3 | 2 | 25 | 3 | 8 | 9.00  | 1.95 | 8.54  | 3  | 1.32 | 0.44 | 3.36 |
| 3 | 2 | 24 | 1 | 1 | 12.40 | 1.75 | 9.66  | 11 | 6.85 | 0.62 | 8.02 |
| 3 | 2 | 24 | 1 | 2 | 15.00 | 1.65 | 8.63  | 9  | 4.08 | 0.45 | 5.04 |
| 3 | 2 | 24 | 1 | 3 | 14.00 | 1.50 | 6.70  | 7  | 3.74 | 0.53 | 6.06 |
| 3 | 2 | 24 | 1 | 4 | 16.00 | 1.65 | 10.26 | 6  | 3.03 | 0.51 | 5.04 |
| 3 | 2 | 24 | 1 | 5 | 12.20 | 1.60 | 15.54 | 6  | 3.07 | 0.51 | 4.75 |
| 3 | 2 | 24 | 1 | 6 | 12.60 | 1.55 | 7.06  | 5  | 2.32 | 0.46 | 6.35 |

|   |   |    |   |   |       |      |       |   |      |      |      |
|---|---|----|---|---|-------|------|-------|---|------|------|------|
| 3 | 2 | 24 | 1 | 7 | 14.60 | 1.70 | 7.90  | 8 | 4.38 | 0.55 | 6.35 |
| 3 | 2 | 24 | 1 | 8 | 11.30 | 1.60 | 6.40  | 4 | 2.21 | 0.55 | 3.86 |
| 3 | 2 | 24 | 2 | 1 | 14.00 | 1.70 | 11.05 | 6 | 0.83 | 0.14 | 6.25 |
| 3 | 2 | 24 | 2 | 2 | 13.80 | 2.00 | 16.05 | 7 | 3.32 | 0.47 | 8.63 |
| 3 | 2 | 24 | 2 | 3 | 13.80 | 2.00 | 17.06 | 8 | 3.93 | 0.49 | 8.28 |
| 3 | 2 | 24 | 2 | 4 | 13.50 | 1.90 | 9.80  | 4 | 1.07 | 0.27 | 5.20 |
| 3 | 2 | 24 | 2 | 5 | 11.60 | 1.75 | 9.46  | 5 | 0.75 | 0.15 | 5.08 |
| 3 | 2 | 24 | 2 | 6 | 11.40 | 1.55 | 6.94  | 4 | 0.99 | 0.25 | 4.04 |
| 3 | 2 | 24 | 2 | 7 | 11.60 | 1.65 | 5.35  | 4 | 2.01 | 0.50 | 2.84 |
| 3 | 2 | 24 | 2 | 8 | 13.40 | 1.75 | 6.58  | 4 | 1.99 | 0.50 | 3.64 |
| 3 | 2 | 24 | 3 | 1 | 11.90 | 1.35 | 5.05  | 4 | 1.33 | 0.33 | 2.76 |
| 3 | 2 | 24 | 3 | 2 | 13.70 | 1.60 | 7.70  | 4 | 1.24 | 0.31 | 4.24 |
| 3 | 2 | 24 | 3 | 3 | 16.00 | 1.55 | 10.02 | 6 | 2.34 | 0.39 | 5.46 |
| 3 | 2 | 24 | 3 | 4 | 14.70 | 1.60 | 6.54  | 3 | 1.01 | 0.34 | 2.86 |
| 3 | 2 | 24 | 3 | 5 | 10.20 | 1.45 | 5.13  | 4 | 1.27 | 0.32 | 2.49 |
| 3 | 2 | 24 | 3 | 6 | 12.00 | 1.65 | 6.73  | 4 | 0.98 | 0.25 | 3.85 |
| 3 | 2 | 24 | 3 | 7 | 12.00 | 1.65 | 10.60 | 6 | 1.40 | 0.23 | 5.27 |
| 3 | 2 | 24 | 3 | 8 | 11.50 | 1.40 | 5.23  | 3 | 1.12 | 0.37 | 2.63 |
| 3 | 2 | 16 | 1 | 1 | 10.60 | 1.95 | 7.85  | 7 | 2.58 | 0.37 | 1.26 |
| 3 | 2 | 16 | 1 | 2 | 13.60 | 1.90 | 8.66  | 1 | 0.36 | 0.36 | 2.88 |
| 3 | 2 | 16 | 1 | 3 | 12.00 | 2.00 | 12.44 | 6 | 2.69 | 0.45 | 5.02 |
| 3 | 2 | 16 | 1 | 4 | 4.30  | 2.05 | 8.17  | 4 | 1.73 | 0.43 | 2.08 |
| 3 | 2 | 16 | 1 | 5 | 12.80 | 1.95 | 8.65  | 4 | 1.95 | 0.49 | 2.70 |
| 3 | 2 | 16 | 1 | 6 | 11.60 | 1.95 | 6.52  | 4 | 1.05 | 0.26 | 1.28 |
| 3 | 2 | 16 | 1 | 7 | 9.40  | 1.65 | 5.80  | 5 | 1.55 | 0.31 | 1.48 |
| 3 | 2 | 16 | 1 | 8 | 10.50 | 2.15 | 7.30  | 4 | 2.04 | 0.51 | 1.55 |
| 3 | 2 | 16 | 2 | 1 | 12.60 | 2.20 | 17.25 | 7 | 3.96 | 0.57 | 8.41 |
| 3 | 2 | 16 | 2 | 2 | 9.70  | 2.15 | 4.87  | 4 | 1.57 | 0.39 | 1.85 |
| 3 | 2 | 16 | 2 | 3 | 14.30 | 2.15 | 17.90 | 8 | 3.47 | 0.43 | 7.87 |
| 3 | 2 | 16 | 2 | 4 | 12.60 | 2.20 | 11.56 | 5 | 2.77 | 0.55 | 3.10 |
| 3 | 2 | 16 | 2 | 5 | 11.60 | 1.85 | 6.72  | 3 | 0.54 | 0.18 | 2.07 |
| 3 | 2 | 16 | 2 | 6 | 11.30 | 2.05 | 9.90  | 6 | 3.25 | 0.54 | 3.03 |
| 3 | 2 | 16 | 2 | 7 | 8.20  | 1.80 | 6.10  | 2 | 6.65 | 3.33 | 1.82 |
| 3 | 2 | 16 | 2 | 8 | 8.70  | 1.90 | 5.66  | 1 | 0.53 | 0.53 | 2.24 |
| 3 | 2 | 16 | 3 | 1 | 10.80 | 2.00 | 11.18 | 5 | 3.60 | 0.72 | 3.89 |
| 3 | 2 | 16 | 3 | 2 | 9.20  | 1.95 | 7.50  | 2 | 1.20 | 0.60 | 3.20 |



|   |   |    |   |   |       |      |       |    |      |      |      |
|---|---|----|---|---|-------|------|-------|----|------|------|------|
| 3 | 2 | 16 | 3 | 3 | 13.40 | 1.90 | 10.00 | 4  | 2.39 | 0.60 | 2.60 |
| 3 | 2 | 16 | 3 | 4 | 10.40 | 1.95 | 5.07  | 1  | 0.30 | 0.30 | 1.64 |
| 3 | 2 | 16 | 3 | 5 | 8.70  | 1.95 | 7.65  | 3  | 2.15 | 0.72 | 2.80 |
| 3 | 2 | 16 | 3 | 6 | 8.20  | 1.75 | 3.04  | 2  | 0.98 | 0.49 | 0.67 |
| 3 | 2 | 16 | 3 | 7 | 8.70  | 1.70 | 7.53  | 5  | 2.30 | 0.46 | 2.05 |
| 3 | 2 | 16 | 3 | 8 | 8.20  | 2.00 | 8.13  | 3  | 2.01 | 0.67 | 3.21 |
| 3 | 2 | 17 | 1 | 1 | 12.50 | 1.80 | 10.12 | 6  | 3.22 | 0.54 | 3.34 |
| 3 | 2 | 17 | 1 | 2 | 16.00 | 1.85 | 11.85 | 3  | 1.35 | 0.45 | 4.54 |
| 3 | 2 | 17 | 1 | 3 | 11.60 | 1.70 | 6.82  | 2  | 0.60 | 0.30 | 1.91 |
| 3 | 2 | 17 | 1 | 4 | 14.12 | 1.80 | 11.56 | 9  | 4.70 | 0.52 | 1.27 |
| 3 | 2 | 17 | 1 | 5 | 13.10 | 1.80 | 8.26  | 4  | 1.46 | 0.37 | 2.39 |
| 3 | 2 | 17 | 1 | 6 | 12.00 | 1.85 | 9.21  | 7  | 3.52 | 0.50 | 1.89 |
| 3 | 2 | 17 | 1 | 7 | 12.30 | 1.65 | 10.64 | 9  | 4.53 | 0.50 | 1.79 |
| 3 | 2 | 17 | 1 | 8 | 10.20 | 1.60 | 6.99  | 7  | 3.12 | 0.45 | 0.90 |
| 3 | 2 | 17 | 2 | 1 | 15.20 | 1.80 | 9.01  | 3  | 1.57 | 0.52 | 1.30 |
| 3 | 2 | 17 | 2 | 2 | 11.50 | 1.80 | 6.90  | 7  | 3.57 | 0.51 | 2.13 |
| 3 | 2 | 17 | 2 | 3 | 15.60 | 1.75 | 11.24 | 5  | 2.82 | 0.56 | 1.83 |
| 3 | 2 | 17 | 2 | 4 | 11.60 | 1.75 | 7.05  | 1  | 0.32 | 0.32 | 0.74 |
| 3 | 2 | 17 | 2 | 5 | 14.60 | 1.85 | 9.84  | 3  | 0.78 | 0.26 | 1.46 |
| 3 | 2 | 17 | 2 | 6 | 10.30 | 1.80 | 7.30  | 3  | 1.30 | 0.43 | 6.40 |
| 3 | 2 | 17 | 2 | 7 | 9.90  | 1.65 | 4.80  | 4  | 2.26 | 0.57 | 2.29 |
| 3 | 2 | 17 | 2 | 8 | 12.60 | 1.80 | 7.52  | 3  | 1.69 | 0.56 | 1.67 |
| 3 | 2 | 17 | 3 | 1 | 7.50  | 1.80 | 4.92  | 1  | 0.20 | 0.20 | 2.10 |
| 3 | 2 | 17 | 3 | 2 | 11.70 | 1.75 | 8.79  | 4  | 1.46 | 0.37 | 0.98 |
| 3 | 2 | 17 | 3 | 3 | 10.80 | 1.70 | 7.42  | 11 | 4.62 | 0.42 | 1.40 |
| 3 | 2 | 17 | 3 | 4 | 13.10 | 1.75 | 7.16  | 6  | 2.35 | 0.39 | 0.99 |
| 3 | 2 | 17 | 3 | 5 | 10.80 | 2.20 | 5.56  | 8  | 3.10 | 0.39 | 1.43 |
| 3 | 2 | 17 | 3 | 6 | 11.20 | 1.60 | 5.58  | 5  | 3.23 | 0.65 | 0.84 |
| 3 | 2 | 17 | 3 | 7 | 7.60  | 1.70 | 6.11  | 1  | 0.46 | 0.46 | 2.10 |
| 3 | 2 | 17 | 3 | 8 | 6.30  | 1.70 | 5.01  | 7  | 1.44 | 0.21 | 2.47 |
| 3 | 2 | 19 | 1 | 1 | 13.50 | 2.00 | 8.99  | 6  | 2.50 | 0.42 | 3.38 |
| 3 | 2 | 19 | 1 | 2 | 10.00 | 1.80 | 7.68  | 3  | 1.40 | 0.47 | 3.16 |
| 3 | 2 | 19 | 1 | 3 | 12.50 | 1.90 | 11.43 | 5  | 2.88 | 0.58 | 4.55 |
| 3 | 2 | 19 | 1 | 4 | 10.20 | 1.90 | 11.44 | 6  | 3.14 | 0.52 | 5.04 |
| 3 | 2 | 19 | 1 | 5 | 9.00  | 1.75 | 4.00  | 1  | 0.30 | 0.30 | 0.42 |
| 3 | 2 | 19 | 1 | 6 | 11.10 | 1.75 | 8.45  | 5  | 2.86 | 0.57 | 2.56 |

|   |   |    |   |   |       |      |       |    |      |      |      |
|---|---|----|---|---|-------|------|-------|----|------|------|------|
| 3 | 2 | 19 | 1 | 7 | 8.60  | 1.90 | 6.43  | 4  | 2.01 | 0.50 | 1.72 |
| 3 | 2 | 19 | 1 | 8 | 6.90  | 1.95 | 5.52  | 3  | 1.55 | 0.52 | 1.94 |
| 3 | 2 | 19 | 2 | 1 | 14.10 | 1.90 | 9.72  | 5  | 2.70 | 0.54 | 3.40 |
| 3 | 2 | 19 | 2 | 2 | 18.30 | 2.00 | 23.41 | 12 | 8.44 | 0.70 | 6.85 |
| 3 | 2 | 19 | 2 | 3 | 13.00 | 1.90 | 8.97  | 6  | 1.87 | 0.31 | 2.90 |
| 3 | 2 | 19 | 2 | 4 | 10.20 | 1.95 | 11.58 | 7  | 4.16 | 0.59 | 2.67 |
| 3 | 2 | 19 | 2 | 5 | 10.30 | 1.55 | 5.42  | 8  | 0.84 | 0.11 | 1.85 |
| 3 | 2 | 19 | 2 | 6 | 9.30  | 1.80 | 6.74  | 3  | 1.34 | 0.45 | 2.25 |
| 3 | 2 | 19 | 2 | 7 | 12.50 | 1.90 | 13.47 | 6  | 3.48 | 0.58 | 6.00 |
| 3 | 2 | 19 | 2 | 8 | 11.00 | 1.75 | 7.49  | 2  | 0.85 | 0.43 | 4.65 |
| 3 | 2 | 19 | 3 | 1 | 16.20 | 1.90 | 15.42 | 7  | 3.30 | 0.47 | 3.96 |
| 3 | 2 | 19 | 3 | 2 | 11.00 | 1.85 | 5.59  | 2  | 0.58 | 0.29 | 1.74 |
| 3 | 2 | 19 | 3 | 3 | 13.00 | 1.80 | 12.35 | 8  | 3.32 | 0.42 | 4.81 |
| 3 | 2 | 19 | 3 | 4 | 14.30 | 1.80 | 11.53 | 3  | 1.22 | 0.41 | 6.25 |
| 3 | 2 | 19 | 3 | 5 | 10.20 | 1.65 | 9.74  | 4  | 1.90 | 0.48 | 4.55 |
| 3 | 2 | 19 | 3 | 6 | 10.90 | 1.85 | 6.62  | 3  | 0.72 | 0.24 | 2.18 |
| 3 | 2 | 19 | 3 | 7 | 9.50  | 1.75 | 4.44  | 2  | 0.68 | 0.34 | 0.93 |
| 3 | 2 | 19 | 3 | 8 | 9.40  | 1.80 | 9.92  | 6  | 3.12 | 0.52 | 3.64 |
| 3 | 2 | 22 | 1 | 1 | 12.50 | 1.65 | 14.52 | 10 | 4.82 | 0.48 | 6.23 |
| 3 | 2 | 22 | 1 | 2 | 11.20 | 1.80 | 9.88  | 7  | 2.77 | 0.40 | 4.32 |
| 3 | 2 | 22 | 1 | 3 | 12.30 | 2.00 | 14.21 | 10 | 4.35 | 0.44 | 6.30 |
| 3 | 2 | 22 | 1 | 4 | 11.70 | 1.75 | 10.54 | 8  | 3.40 | 0.43 | 4.05 |
| 3 | 2 | 22 | 1 | 5 | 10.20 | 1.75 | 9.42  | 5  | 2.70 | 0.54 | 4.20 |
| 3 | 2 | 22 | 1 | 6 | 10.60 | 2.00 | 10.17 | 5  | 2.85 | 0.57 | 4.32 |
| 3 | 2 | 22 | 1 | 7 | 10.30 | 1.90 | 8.50  | 6  | 2.10 | 0.35 | 3.77 |
| 3 | 2 | 22 | 1 | 8 | 11.00 | 1.65 | 8.57  | 7  | 2.50 | 0.36 | 3.51 |
| 3 | 2 | 22 | 2 | 1 | 12.60 | 1.90 | 11.06 | 7  | 2.80 | 0.40 | 5.00 |
| 3 | 2 | 22 | 2 | 2 | 12.40 | 1.85 | 12.59 | 9  | 4.20 | 0.47 | 4.69 |
| 3 | 2 | 22 | 2 | 3 | 9.60  | 1.65 | 7.74  | 6  | 2.25 | 0.38 | 3.20 |
| 3 | 2 | 22 | 2 | 4 | 11.30 | 1.50 | 7.16  | 7  | 1.60 | 0.23 | 3.49 |
| 3 | 2 | 22 | 2 | 5 | 11.00 | 1.55 | 9.30  | 10 | 3.42 | 0.34 | 3.68 |
| 3 | 2 | 22 | 2 | 6 | 11.10 | 1.50 | 11.79 | 9  | 4.32 | 0.48 | 5.48 |
| 3 | 2 | 22 | 2 | 7 | 8.00  | 1.65 | 7.18  | 5  | 1.20 | 0.24 | 3.56 |
| 3 | 2 | 22 | 2 | 8 | 9.00  | 1.65 | 5.94  | 5  | 1.84 | 0.37 | 2.29 |
| 3 | 2 | 22 | 3 | 1 | 12.30 | 1.65 | 11.53 | 8  | 2.46 | 0.31 | 5.58 |
| 3 | 2 | 22 | 3 | 2 | 14.40 | 1.70 | 15.49 | 12 | 5.08 | 0.42 | 6.28 |

|   |   |    |   |   |       |      |       |    |      |      |       |
|---|---|----|---|---|-------|------|-------|----|------|------|-------|
| 3 | 2 | 22 | 3 | 3 | 12.00 | 1.75 | 10.98 | 10 | 3.06 | 0.31 | 4.75  |
| 3 | 2 | 22 | 3 | 4 | 10.50 | 1.80 | 10.78 | 7  | 3.42 | 0.49 | 4.42  |
| 3 | 2 | 22 | 3 | 5 | 11.20 | 1.80 | 8.61  | 6  | 2.11 | 0.35 | 3.68  |
| 3 | 2 | 22 | 3 | 6 | 9.10  | 1.80 | 6.71  | 5  | 1.45 | 0.29 | 3.24  |
| 3 | 2 | 22 | 3 | 7 | 12.50 | 1.70 | 12.32 | 11 | 3.72 | 0.34 | 5.56  |
| 3 | 2 | 22 | 3 | 8 | 8.80  | 1.55 | 6.34  | 6  | 2.11 | 0.35 | 2.41  |
| 3 | 2 | 27 | 1 | 1 | 12.10 | 2.15 | 10.71 | 4  | 0.76 | 0.19 | 3.91  |
| 3 | 2 | 27 | 1 | 2 | 14.40 | 2.05 | 15.39 | 7  | 3.88 | 0.55 | 7.75  |
| 3 | 2 | 27 | 1 | 3 | 13.30 | 2.05 | 13.37 | 6  | 3.83 | 0.64 | 5.86  |
| 3 | 2 | 27 | 1 | 4 | 11.90 | 1.85 | 10.04 | 3  | 2.43 | 0.81 | 3.30  |
| 3 | 2 | 27 | 1 | 5 | 12.00 | 1.75 | 10.97 | 6  | 2.89 | 0.48 | 5.22  |
| 3 | 2 | 27 | 1 | 6 | 12.00 | 1.85 | 10.83 | 7  | 2.50 | 0.36 | 5.82  |
| 3 | 2 | 27 | 1 | 7 | 10.80 | 1.95 | 9.53  | 4  | 1.61 | 0.40 | 5.06  |
| 3 | 2 | 27 | 1 | 8 | 10.20 | 1.75 | 9.69  | 5  | 2.29 | 0.46 | 5.44  |
| 3 | 2 | 27 | 2 | 1 | 12.00 | 2.00 | 12.41 | 8  | 4.80 | 0.60 | 1.86  |
| 3 | 2 | 27 | 2 | 2 | 12.10 | 2.00 | 10.12 | 3  | 1.60 | 0.53 | 5.52  |
| 3 | 2 | 27 | 2 | 3 | 16.50 | 2.05 | 16.50 | 9  | 5.13 | 0.57 | 7.05  |
| 3 | 2 | 27 | 2 | 4 | 13.70 | 1.95 | 15.44 | 8  | 4.90 | 0.61 | 5.51  |
| 3 | 2 | 27 | 2 | 5 | 12.60 | 1.95 | 13.60 | 8  | 4.31 | 0.54 | 5.58  |
| 3 | 2 | 27 | 2 | 6 | 14.20 | 1.95 | 16.55 | 10 | 5.69 | 0.57 | 7.01  |
| 3 | 2 | 27 | 2 | 7 | 11.20 | 2.05 | 10.69 | 5  | 3.65 | 0.73 | 2.68  |
| 3 | 2 | 27 | 2 | 8 | 11.70 | 1.75 | 9.69  | 6  | 2.35 | 0.39 | 4.27  |
| 3 | 2 | 27 | 3 | 1 | 9.40  | 1.85 | 10.74 | 4  | 2.31 | 0.58 | 4.95  |
| 3 | 2 | 27 | 3 | 2 | 9.00  | 1.85 | 9.20  | 6  | 2.95 | 0.49 | 3.97  |
| 3 | 2 | 27 | 3 | 3 | 13.90 | 1.75 | 11.16 | 4  | 1.78 | 0.45 | 6.35  |
| 3 | 2 | 27 | 3 | 4 | 15.90 | 1.85 | 17.37 | 12 | 4.86 | 0.41 | 7.93  |
| 3 | 2 | 27 | 3 | 5 | 13.20 | 1.70 | 14.30 | 10 | 5.33 | 0.53 | 5.10  |
| 3 | 2 | 27 | 3 | 6 | 11.30 | 1.85 | 11.17 | 7  | 4.27 | 0.61 | 3.55  |
| 3 | 2 | 27 | 3 | 7 | 13.10 | 1.75 | 10.76 | 7  | 2.89 | 0.41 | 4.40  |
| 3 | 2 | 27 | 3 | 8 | 9.80  | 1.70 | 7.44  | 6  | 2.06 | 0.34 | 3.10  |
| 3 | 1 | 2  | 1 | 1 | 15.00 | 2.10 | 19.69 | 12 | 6.64 | 0.55 | 9.76  |
| 3 | 1 | 2  | 1 | 2 | 16.20 | 2.10 | 21.33 | 10 | 6.16 | 0.62 | 7.06  |
| 3 | 1 | 2  | 1 | 3 | 15.10 | 2.25 | 18.95 | 10 | 6.19 | 0.62 | 9.16  |
| 3 | 1 | 2  | 1 | 4 | 13.40 | 1.90 | 18.45 | 8  | 5.05 | 0.63 | 8.36  |
| 3 | 1 | 2  | 1 | 5 | 14.90 | 2.20 | 18.84 | 8  | 5.28 | 0.66 | 8.19  |
| 3 | 1 | 2  | 1 | 6 | 15.20 | 2.20 | 19.96 | 9  | 5.86 | 0.65 | 10.16 |

|   |   |    |   |   |       |      |       |    |      |      |       |
|---|---|----|---|---|-------|------|-------|----|------|------|-------|
| 3 | 1 | 2  | 1 | 7 | 10.80 | 1.90 | 14.24 | 12 | 5.16 | 0.43 | 6.36  |
| 3 | 1 | 2  | 1 | 8 | 13.40 | 2.00 | 16.85 | 8  | 3.72 | 0.47 | 6.49  |
| 3 | 1 | 2  | 2 | 1 | 15.90 | 1.85 | 17.63 | 6  | 2.75 | 0.46 | 9.15  |
| 3 | 1 | 2  | 2 | 2 | 11.50 | 2.02 | 14.66 | 8  | 4.03 | 0.50 | 5.76  |
| 3 | 1 | 2  | 2 | 3 | 11.50 | 1.94 | 17.32 | 11 | 4.28 | 0.39 | 7.39  |
| 3 | 1 | 2  | 2 | 4 | 15.50 | 2.05 | 27.20 | 13 | 6.89 | 0.53 | 11.13 |
| 3 | 1 | 2  | 2 | 5 | 11.30 | 1.80 | 13.18 | 7  | 3.56 | 0.51 | 5.93  |
| 3 | 1 | 2  | 2 | 6 | 13.40 | 2.01 | 18.48 | 7  | 3.33 | 0.48 | 4.00  |
| 3 | 1 | 2  | 2 | 7 | 11.50 | 2.00 | 12.50 | 6  | 2.99 | 0.50 | 5.69  |
| 3 | 1 | 2  | 2 | 8 | 9.30  | 2.05 | 11.05 | 5  | 2.93 | 0.59 | 5.06  |
| 3 | 1 | 2  | 3 | 1 | 14.60 | 2.15 | 21.28 | 11 | 5.89 | 0.54 | 7.58  |
| 3 | 1 | 2  | 3 | 2 | 17.40 | 2.20 | 20.50 | 12 | 7.23 | 0.60 | 9.59  |
| 3 | 1 | 2  | 3 | 3 | 14.90 | 2.43 | 23.01 | 11 | 6.08 | 0.55 | 9.47  |
| 3 | 1 | 2  | 3 | 4 | 14.30 | 2.15 | 18.69 | 9  | 3.67 | 0.41 | 7.15  |
| 3 | 1 | 2  | 3 | 5 | 15.40 | 2.09 | 24.45 | 12 | 6.22 | 0.52 | 4.75  |
| 3 | 1 | 2  | 3 | 6 | 8.00  | 2.35 | 10.08 | 5  | 2.16 | 0.43 | 8.44  |
| 3 | 1 | 2  | 3 | 7 | 13.40 | 2.05 | 19.25 | 9  | 4.66 | 0.52 | 9.94  |
| 3 | 1 | 2  | 3 | 8 | 11.50 | 2.20 | 15.80 | 7  | 4.49 | 0.64 | 6.16  |
| 3 | 1 | 13 | 1 | 1 | 8.40  | 1.75 | 9.22  | 12 | 6.00 | 0.50 | 3.55  |
| 3 | 1 | 13 | 1 | 2 | 13.30 | 1.89 | 18.00 | 7  | 3.57 | 0.51 | 3.28  |
| 3 | 1 | 13 | 1 | 3 | 12.30 | 1.99 | 17.03 | 4  | 1.40 | 0.35 | 0.76  |
| 3 | 1 | 13 | 1 | 4 | 12.00 | 1.90 | 14.94 | 4  | 1.45 | 0.36 | 0.80  |
| 3 | 1 | 13 | 1 | 5 | 12.30 | 1.75 | 13.54 | 5  | 2.25 | 0.45 | 0.59  |
| 3 | 1 | 13 | 1 | 6 | 13.00 | 1.80 | 14.41 | 3  | 0.73 | 0.24 | 0.74  |
| 3 | 1 | 13 | 1 | 7 | 7.00  | 1.55 | 5.97  | 3  | 1.54 | 0.51 | 0.85  |
| 3 | 1 | 13 | 1 | 8 | 7.50  | 1.94 | 7.99  | 5  | 2.80 | 0.56 | 1.66  |
| 3 | 1 | 13 | 2 | 1 | 15.30 | 1.95 | 16.71 | 11 | 7.04 | 0.64 | 2.64  |
| 3 | 1 | 13 | 2 | 2 | 10.40 | 1.90 | 12.44 | 9  | 6.12 | 0.68 | 3.33  |
| 3 | 1 | 13 | 2 | 3 | 7.60  | 1.80 | 8.16  | 5  | 4.13 | 0.83 | 4.58  |
| 3 | 1 | 13 | 2 | 4 | 8.80  | 1.64 | 6.82  | 3  | 2.07 | 0.69 | 5.96  |
| 3 | 1 | 13 | 2 | 5 | 6.80  | 1.94 | 7.58  | 9  | 6.15 | 0.68 | 3.34  |
| 3 | 1 | 13 | 2 | 6 | 6.70  | 1.65 | 4.61  | 9  | 5.42 | 0.60 | 3.53  |
| 3 | 1 | 13 | 2 | 7 | 5.90  | 1.89 | 6.28  | 3  | 2.97 | 0.99 | 1.68  |
| 3 | 1 | 13 | 2 | 8 | 6.40  | 1.75 | 7.35  | 5  | 5.74 | 1.15 | 5.35  |
| 3 | 1 | 13 | 3 | 1 | 13.40 | 1.94 | 12.87 | 11 | 6.09 | 0.55 | 7.75  |
| 3 | 1 | 13 | 3 | 2 | 13.00 | 1.99 | 17.70 | 7  | 6.52 | 0.93 | 5.51  |

|   |   |    |   |   |       |      |       |    |       |      |      |
|---|---|----|---|---|-------|------|-------|----|-------|------|------|
| 3 | 1 | 13 | 3 | 3 | 8.80  | 1.99 | 11.26 | 10 | 8.52  | 0.85 | 9.15 |
| 3 | 1 | 13 | 3 | 4 | 11.70 | 1.90 | 14.92 | 10 | 7.84  | 0.78 | 6.22 |
| 3 | 1 | 13 | 3 | 5 | 7.10  | 1.85 | 8.05  | 4  | 3.12  | 0.78 | 4.06 |
| 3 | 1 | 13 | 3 | 6 | 9.80  | 1.80 | 11.09 | 6  | 7.06  | 1.18 | 6.03 |
| 3 | 1 | 13 | 3 | 7 | 10.30 | 1.90 | 13.19 | 7  | 5.15  | 0.74 | 3.77 |
| 3 | 1 | 13 | 3 | 8 | 7.10  | 1.75 | 5.68  | 3  | 0.49  | 0.16 | 0.95 |
| 3 | 1 | 15 | 1 | 1 | 10.90 | 1.70 | 12.03 | 11 | 5.40  | 0.49 | 4.62 |
| 3 | 1 | 15 | 1 | 2 | 9.70  | 1.40 | 12.00 | 8  | 4.45  | 0.56 | 1.72 |
| 3 | 1 | 15 | 1 | 3 | 11.40 | 1.50 | 10.89 | 8  | 4.38  | 0.55 | 5.65 |
| 3 | 1 | 15 | 1 | 4 | 11.70 | 1.50 | 14.50 | 5  | 3.84  | 0.77 | 4.14 |
| 3 | 1 | 15 | 1 | 5 | 13.60 | 1.70 | 16.06 | 10 | 6.35  | 0.64 | 4.83 |
| 3 | 1 | 15 | 1 | 6 | 10.60 | 1.69 | 11.54 | 5  | 3.76  | 0.75 | 4.62 |
| 3 | 1 | 15 | 1 | 7 | 7.90  | 1.80 | 9.15  | 9  | 5.68  | 0.63 | 5.35 |
| 3 | 1 | 15 | 1 | 8 | 7.00  | 1.65 | 8.33  | 11 | 7.13  | 0.65 | 5.33 |
| 3 | 1 | 15 | 2 | 1 | 12.30 | 1.60 | 16.36 | 8  | 6.99  | 0.87 | 6.08 |
| 3 | 1 | 15 | 2 | 2 | 15.50 | 1.70 | 22.76 | 13 | 11.16 | 0.86 | 7.93 |
| 3 | 1 | 15 | 2 | 3 | 13.80 | 1.63 | 15.20 | 12 | 8.36  | 0.70 | 5.67 |
| 3 | 1 | 15 | 2 | 4 | 14.10 | 1.55 | 17.86 | 11 | 10.44 | 0.95 | 7.92 |
| 3 | 1 | 15 | 2 | 5 | 15.00 | 1.85 | 21.03 | 9  | 7.20  | 0.80 | 5.36 |
| 3 | 1 | 15 | 2 | 6 | 12.00 | 1.65 | 15.60 | 7  | 6.07  | 0.87 | 5.68 |
| 3 | 1 | 15 | 2 | 7 | 14.20 | 1.69 | 13.27 | 6  | 4.32  | 0.72 | 7.20 |
| 3 | 1 | 15 | 2 | 8 | 13.50 | 1.70 | 16.34 | 11 | 8.84  | 0.80 | 6.49 |
| 3 | 1 | 15 | 3 | 1 | 12.50 | 1.75 | 18.73 | 9  | 8.53  | 0.95 | 6.84 |
| 3 | 1 | 15 | 3 | 2 | 14.30 | 1.84 | 17.49 | 12 | 8.11  | 0.68 | 6.08 |
| 3 | 1 | 15 | 3 | 3 | 12.60 | 1.75 | 17.04 | 9  | 7.74  | 0.86 | 6.99 |
| 3 | 1 | 15 | 3 | 4 | 11.00 | 1.64 | 12.59 | 8  | 6.72  | 0.84 | 5.21 |
| 3 | 1 | 15 | 3 | 5 | 9.50  | 1.65 | 11.59 | 6  | 5.88  | 0.98 | 5.45 |
| 3 | 1 | 15 | 3 | 6 | 13.50 | 1.70 | 17.76 | 9  | 7.35  | 0.82 | 6.44 |
| 3 | 1 | 15 | 3 | 7 | 8.80  | 1.65 | 12.04 | 7  | 5.44  | 0.78 | 3.35 |
| 3 | 1 | 15 | 3 | 8 | 8.50  | 1.65 | 11.57 | 5  | 4.88  | 0.98 | 4.00 |
| 3 | 1 | 11 | 1 | 1 | 11.20 | 1.98 | 12.37 | 3  | 2.46  | 0.82 | 5.99 |
| 3 | 1 | 11 | 1 | 2 | 14.40 | 1.99 | 19.92 | 7  | 5.11  | 0.73 | 9.17 |
| 3 | 1 | 11 | 1 | 3 | 12.90 | 1.75 | 14.05 | 8  | 5.47  | 0.68 | 7.01 |
| 3 | 1 | 11 | 1 | 4 | 12.90 | 1.88 | 14.07 | 4  | 2.49  | 0.62 | 6.33 |
| 3 | 1 | 11 | 1 | 5 | 12.40 | 1.85 | 9.56  | 4  | 1.19  | 0.30 | 5.97 |
| 3 | 1 | 11 | 1 | 6 | 10.60 | 1.79 | 6.67  | 3  | 1.39  | 0.46 | 2.48 |

|   |   |    |   |   |       |      |       |    |      |      |       |
|---|---|----|---|---|-------|------|-------|----|------|------|-------|
| 3 | 1 | 11 | 1 | 7 | 11.50 | 1.55 | 6.90  | 2  | 0.95 | 0.48 | 3.90  |
| 3 | 1 | 11 | 1 | 8 | 13.50 | 1.80 | 11.85 | 7  | 3.63 | 0.52 | 4.00  |
| 3 | 1 | 11 | 2 | 1 | 16.00 | 2.00 | 11.29 | 8  | 3.91 | 0.49 | 7.19  |
| 3 | 1 | 11 | 2 | 2 | 11.50 | 1.91 | 16.75 | 6  | 4.64 | 0.77 | 7.64  |
| 3 | 1 | 11 | 2 | 3 | 16.20 | 1.87 | 11.66 | 9  | 2.84 | 0.32 | 2.78  |
| 3 | 1 | 11 | 2 | 4 | 12.30 | 1.70 | 10.07 | 7  | 2.73 | 0.39 | 3.05  |
| 3 | 1 | 11 | 2 | 5 | 10.90 | 1.80 | 9.35  | 5  | 1.96 | 0.39 | 3.15  |
| 3 | 1 | 11 | 2 | 6 | 11.70 | 1.55 | 5.27  | 3  | 1.21 | 0.40 | 1.44  |
| 3 | 1 | 11 | 2 | 7 | 11.60 | 2.04 | 13.32 | 5  | 3.61 | 0.72 | 6.38  |
| 3 | 1 | 11 | 2 | 8 | 10.20 | 1.95 | 9.70  | 3  | 1.49 | 0.50 | 4.59  |
| 3 | 1 | 11 | 3 | 1 | 12.00 | 1.85 | 11.45 | 5  | 1.13 | 0.23 | 5.67  |
| 3 | 1 | 11 | 3 | 2 | 13.70 | 1.93 | 19.56 | 7  | 4.75 | 0.68 | 7.97  |
| 3 | 1 | 11 | 3 | 3 | 14.80 | 2.05 | 20.80 | 7  | 5.25 | 0.75 | 8.47  |
| 3 | 1 | 11 | 3 | 4 | 15.00 | 1.70 | 15.26 | 9  | 4.97 | 0.55 | 5.87  |
| 3 | 1 | 11 | 3 | 5 | 17.50 | 2.10 | 28.63 | 10 | 8.59 | 0.86 | 12.19 |
| 3 | 1 | 11 | 3 | 6 | 4.30  | 1.80 | 10.59 | 6  | 2.87 | 0.48 | 4.44  |
| 3 | 1 | 11 | 3 | 7 | 12.50 | 1.83 | 11.50 | 7  | 3.52 | 0.50 | 5.10  |
| 3 | 1 | 11 | 3 | 8 | 10.50 | 1.90 | 11.59 | 4  | 2.80 | 0.70 | 5.51  |
| 3 | 1 | 12 | 1 | 1 | 9.70  | 1.50 | 4.29  | 4  | 3.89 | 0.97 | 1.89  |
| 3 | 1 | 12 | 1 | 2 | 13.40 | 1.89 | 17.62 | 9  | 6.34 | 0.70 | 4.89  |
| 3 | 1 | 12 | 1 | 3 | 10.00 | 1.85 | 12.73 | 6  | 4.18 | 0.70 | 3.00  |
| 3 | 1 | 12 | 1 | 4 | 7.00  | 1.75 | 6.85  | 4  | 2.46 | 0.62 | 1.93  |
| 3 | 1 | 12 | 1 | 5 | 12.00 | 1.75 | 7.00  | 8  | 8.07 | 1.01 | 3.62  |
| 3 | 1 | 12 | 1 | 6 | 8.60  | 1.75 | 6.25  | 5  | 2.07 | 0.41 | 1.42  |
| 3 | 1 | 12 | 1 | 7 | 14.80 | 1.75 | 13.22 | 11 | 4.31 | 0.39 | 4.12  |
| 3 | 1 | 12 | 1 | 8 | 8.10  | 1.75 | 5.05  | 2  | 6.70 | 3.35 | 1.94  |
| 3 | 1 | 12 | 2 | 1 | 10.10 | 1.70 | 7.64  | 6  | 3.12 | 0.52 | 4.43  |
| 3 | 1 | 12 | 2 | 2 | 12.30 | 1.70 | 9.75  | 1  | 0.82 | 0.82 | 4.77  |
| 3 | 1 | 12 | 2 | 3 | 12.10 | 1.88 | 10.67 | 4  | 1.88 | 0.47 | 5.62  |
| 3 | 1 | 12 | 2 | 4 | 9.10  | 1.74 | 7.34  | 5  | 2.19 | 0.44 | 3.04  |
| 3 | 1 | 12 | 2 | 5 | 9.30  | 1.59 | 5.04  | 3  | 3.10 | 1.03 | 3.58  |
| 3 | 1 | 12 | 2 | 6 | 10.50 | 1.70 | 8.02  | 7  | 2.65 | 0.38 | 3.51  |
| 3 | 1 | 12 | 2 | 7 | 9.20  | 1.85 | 5.66  | 6  | 4.80 | 0.80 | 3.54  |
| 3 | 1 | 12 | 2 | 8 | 8.80  | 1.60 | 5.04  | 4  | 2.30 | 0.58 | 1.92  |
| 3 | 1 | 12 | 3 | 1 | 10.20 | 1.60 | 5.76  | 4  | 1.78 | 0.45 | 3.55  |
| 3 | 1 | 12 | 3 | 2 | 12.10 | 1.75 | 9.09  | 3  | 2.68 | 0.89 | 4.70  |

|   |   |    |   |   |       |      |       |   |      |      |      |
|---|---|----|---|---|-------|------|-------|---|------|------|------|
| 3 | 1 | 12 | 3 | 3 | 8.80  | 1.65 | 5.84  | 3 | 1.31 | 0.44 | 2.97 |
| 3 | 1 | 12 | 3 | 4 | 7.50  | 1.79 | 5.79  | 5 | 3.91 | 0.78 | 3.58 |
| 3 | 1 | 12 | 3 | 5 | 7.10  | 2.05 | 6.07  | 2 | 1.14 | 0.57 | 0.29 |
| 3 | 1 | 12 | 3 | 6 | 9.20  | 1.50 | 8.11  | 1 | 0.42 | 0.42 | 2.42 |
| 3 | 1 | 12 | 3 | 7 | 8.70  | 1.60 | 3.67  | 5 | 2.35 | 0.47 | 1.95 |
| 3 | 1 | 12 | 3 | 8 | 10.50 | 1.84 | 7.68  | 1 | 0.25 | 0.25 | 4.65 |
| 3 | 1 | 10 | 1 | 1 | 9.90  | 1.98 | 15.35 | 6 | 4.49 | 0.75 | 5.57 |
| 3 | 1 | 10 | 1 | 2 | 9.60  | 2.04 | 10.78 | 5 | 2.93 | 0.59 | 1.72 |
| 3 | 1 | 10 | 1 | 3 | 10.20 | 1.84 | 11.49 | 4 | 3.79 | 0.95 | 2.17 |
| 3 | 1 | 10 | 1 | 4 | 9.60  | 1.80 | 7.74  | 6 | 4.33 | 0.72 | 3.02 |
| 3 | 1 | 10 | 1 | 5 | 12.00 | 1.70 | 9.95  | 7 | 3.97 | 0.57 | 2.93 |
| 3 | 1 | 10 | 1 | 6 | 9.70  | 1.95 | 11.22 | 7 | 4.08 | 0.58 | 3.67 |
| 3 | 1 | 10 | 1 | 7 | 13.90 | 1.95 | 13.19 | 4 | 4.09 | 1.02 | 5.02 |
| 3 | 1 | 10 | 1 | 8 | 8.20  | 1.69 | 9.30  | 5 | 4.16 | 0.83 | 4.61 |
| 3 | 1 | 10 | 2 | 1 | 7.30  | 1.94 | 6.77  | 6 | 4.28 | 0.71 | 5.01 |
| 3 | 1 | 10 | 2 | 2 | 8.30  | 1.80 | 6.30  | 3 | 2.09 | 0.70 | 1.28 |
| 3 | 1 | 10 | 2 | 3 | 10.00 | 1.90 | 14.20 | 2 | 0.64 | 0.32 | 0.82 |
| 3 | 1 | 10 | 2 | 4 | 8.60  | 1.85 | 8.22  | 4 | 1.82 | 0.46 | 1.62 |
| 3 | 1 | 10 | 2 | 5 | 11.90 | 2.09 | 10.73 | 5 | 2.48 | 0.50 | 2.15 |
| 3 | 1 | 10 | 2 | 6 | 11.70 | 1.94 | 14.98 | 7 | 3.79 | 0.54 | 6.38 |
| 3 | 1 | 10 | 2 | 7 | 8.30  | 1.94 | 6.17  | 2 | 0.92 | 0.46 | 2.56 |
| 3 | 1 | 10 | 2 | 8 | 7.20  | 1.94 | 8.15  | 4 | 1.70 | 0.43 | 2.89 |
| 3 | 1 | 10 | 3 | 1 | 9.70  | 1.90 | 12.68 | 6 | 3.83 | 0.64 | 3.89 |
| 3 | 1 | 10 | 3 | 2 | 10.50 | 1.75 | 8.69  | 3 | 1.41 | 0.47 | 3.01 |
| 3 | 1 | 10 | 3 | 3 | 8.80  | 1.90 | 6.90  | 2 | 0.61 | 0.31 | 2.55 |
| 3 | 1 | 10 | 3 | 4 | 8.60  | 1.99 | 11.08 | 5 | 2.97 | 0.59 | 3.48 |
| 3 | 1 | 10 | 3 | 5 | 11.70 | 1.90 | 15.51 | 3 | 1.29 | 0.43 | 0.78 |
| 3 | 1 | 10 | 3 | 6 | 8.70  | 1.75 | 9.19  | 7 | 4.48 | 0.64 | 5.28 |
| 3 | 1 | 10 | 3 | 7 | 7.50  | 1.70 | 4.75  | 3 | 2.12 | 0.71 | 2.39 |
| 3 | 1 | 10 | 3 | 8 | 5.00  | 1.89 | 6.79  | 6 | 3.40 | 0.57 | 2.95 |
| 3 | 1 | 14 | 1 | 1 | 13.20 | 1.84 | 11.18 | 6 | 3.96 | 0.66 | 2.51 |
| 3 | 1 | 14 | 1 | 2 | 13.70 | 1.75 | 11.92 | 6 | 3.67 | 0.61 | 3.39 |
| 3 | 1 | 14 | 1 | 3 | 15.60 | 1.65 | 10.10 | 6 | 3.58 | 0.60 | 4.59 |
| 3 | 1 | 14 | 1 | 4 | 14.60 | 1.60 | 11.98 | 3 | 2.41 | 0.80 | 2.85 |
| 3 | 1 | 14 | 1 | 5 | 13.90 | 1.90 | 13.60 | 4 | 2.78 | 0.70 | 3.28 |
| 3 | 1 | 14 | 1 | 6 | 6.00  | 1.85 | 7.82  | 2 | 1.07 | 0.54 | 3.07 |

|   |   |    |   |   |       |      |       |    |      |      |       |
|---|---|----|---|---|-------|------|-------|----|------|------|-------|
| 3 | 1 | 14 | 1 | 7 | 9.20  | 1.55 | 8.66  | 3  | 2.42 | 0.81 | 3.60  |
| 3 | 1 | 14 | 1 | 8 | 14.00 | 1.80 | 13.97 | 3  | 2.31 | 0.77 | 4.51  |
| 3 | 1 | 14 | 2 | 1 | 10.10 | 1.60 | 7.22  | 3  | 2.12 | 0.71 | 2.72  |
| 3 | 1 | 14 | 2 | 2 | 16.30 | 1.70 | 15.93 | 8  | 4.26 | 0.53 | 3.40  |
| 3 | 1 | 14 | 2 | 3 | 16.20 | 1.96 | 16.35 | 5  | 3.03 | 0.61 | 1.30  |
| 3 | 1 | 14 | 2 | 4 | 14.20 | 1.75 | 14.98 | 8  | 4.15 | 0.52 | 4.58  |
| 3 | 1 | 14 | 2 | 5 | 14.40 | 1.80 | 17.53 | 8  | 6.02 | 0.75 | 5.10  |
| 3 | 1 | 14 | 2 | 6 | 12.90 | 1.70 | 9.26  | 4  | 1.82 | 0.46 | 3.50  |
| 3 | 1 | 14 | 2 | 7 | 12.50 | 1.85 | 13.35 | 5  | 3.55 | 0.71 | 5.28  |
| 3 | 1 | 14 | 2 | 8 | 10.60 | 1.75 | 9.97  | 4  | 2.56 | 0.64 | 4.00  |
| 3 | 1 | 14 | 3 | 1 | 11.00 | 1.70 | 7.85  | 3  | 1.74 | 0.58 | 3.52  |
| 3 | 1 | 14 | 3 | 2 | 9.90  | 1.35 | 6.41  | 4  | 1.41 | 0.35 | 1.76  |
| 3 | 1 | 14 | 3 | 3 | 11.80 | 1.40 | 6.83  | 3  | 0.96 | 0.32 | 1.58  |
| 3 | 1 | 14 | 3 | 4 | 8.30  | 1.75 | 6.83  | 3  | 0.45 | 0.15 | 2.24  |
| 3 | 1 | 14 | 3 | 5 | 9.30  | 1.65 | 5.52  | 5  | 4.70 | 0.94 | 5.13  |
| 3 | 1 | 14 | 3 | 6 | 6.50  | 1.70 | 6.24  | 3  | 1.06 | 0.35 | 1.97  |
| 3 | 1 | 14 | 3 | 7 | 9.50  | 1.45 | 6.52  | 3  | 1.62 | 0.54 | 1.13  |
| 3 | 1 | 14 | 3 | 8 | 7.30  | 1.50 | 6.33  | 1  | 0.33 | 0.33 | 0.59  |
| 3 | 1 | 8  | 1 | 1 | 16.80 | 2.25 | 27.26 | 10 | 8.71 | 0.87 | 10.43 |
| 3 | 1 | 8  | 1 | 2 | 11.60 | 1.99 | 14.92 | 7  | 4.56 | 0.65 | 5.77  |
| 3 | 1 | 8  | 1 | 3 | 11.80 | 1.84 | 9.67  | 3  | 1.37 | 0.46 | 5.08  |
| 3 | 1 | 8  | 1 | 4 | 16.40 | 1.94 | 20.39 | 9  | 6.16 | 0.68 | 7.60  |
| 3 | 1 | 8  | 1 | 5 | 13.50 | 2.05 | 17.45 | 4  | 3.07 | 0.77 | 5.43  |
| 3 | 1 | 8  | 1 | 6 | 14.10 | 2.05 | 17.56 | 7  | 4.75 | 0.68 | 7.12  |
| 3 | 1 | 8  | 1 | 7 | 11.10 | 1.90 | 11.45 | 7  | 5.18 | 0.74 | 7.26  |
| 3 | 1 | 8  | 1 | 8 | 13.90 | 1.93 | 12.08 | 2  | 1.38 | 0.69 | 6.49  |
| 3 | 1 | 8  | 2 | 1 | 21.30 | 2.05 | 31.04 | 12 | 9.91 | 0.83 | 12.23 |
| 3 | 1 | 8  | 2 | 2 | 16.80 | 1.75 | 16.72 | 5  | 3.11 | 0.62 | 2.54  |
| 3 | 1 | 8  | 2 | 3 | 16.20 | 2.00 | 21.35 | 7  | 5.35 | 0.76 | 7.14  |
| 3 | 1 | 8  | 2 | 4 | 15.60 | 1.89 | 20.29 | 8  | 5.16 | 0.65 | 6.78  |
| 3 | 1 | 8  | 2 | 5 | 18.00 | 2.08 | 26.52 | 10 | 8.16 | 0.82 | 9.06  |
| 3 | 1 | 8  | 2 | 6 | 10.60 | 2.09 | 12.79 | 3  | 2.36 | 0.79 | 5.28  |
| 3 | 1 | 8  | 2 | 7 | 8.20  | 1.85 | 10.32 | 5  | 3.56 | 0.71 | 3.15  |
| 3 | 1 | 8  | 2 | 8 | 12.00 | 1.55 | 9.36  | 6  | 3.30 | 0.55 | 3.50  |
| 3 | 1 | 8  | 3 | 1 | 16.00 | 1.75 | 16.20 | 8  | 4.65 | 0.58 | 4.05  |
| 3 | 1 | 8  | 3 | 2 | 14.50 | 1.86 | 13.75 | 3  | 2.05 | 0.68 | 6.64  |



|   |   |   |   |   |       |      |       |    |      |      |      |
|---|---|---|---|---|-------|------|-------|----|------|------|------|
| 3 | 1 | 8 | 3 | 3 | 9.60  | 1.85 | 7.44  | 9  | 5.34 | 0.59 | 8.31 |
| 3 | 1 | 8 | 3 | 4 | 13.00 | 2.00 | 15.94 | 7  | 3.50 | 0.50 | 4.71 |
| 3 | 1 | 8 | 3 | 5 | 17.30 | 1.80 | 13.71 | 8  | 4.88 | 0.61 | 5.71 |
| 3 | 1 | 8 | 3 | 6 | 15.20 | 1.90 | 17.57 | 5  | 3.94 | 0.79 | 5.68 |
| 3 | 1 | 8 | 3 | 7 | 16.00 | 1.90 | 13.93 | 7  | 4.00 | 0.57 | 3.70 |
| 3 | 1 | 8 | 3 | 8 | 13.20 | 2.20 | 15.00 | 6  | 3.85 | 0.64 | 6.25 |
| 3 | 1 | 9 | 1 | 1 | 17.80 | 2.24 | 11.33 | 5  | 3.46 | 0.69 | 4.62 |
| 3 | 1 | 9 | 1 | 2 | 9.50  | 2.09 | 12.77 | 5  | 3.12 | 0.62 | 5.70 |
| 3 | 1 | 9 | 1 | 3 | 7.50  | 1.70 | 5.20  | 4  | 2.89 | 0.72 | 3.62 |
| 3 | 1 | 9 | 1 | 4 | 13.80 | 2.04 | 19.76 | 10 | 7.31 | 0.73 | 8.03 |
| 3 | 1 | 9 | 1 | 5 | 9.40  | 1.70 | 10.08 | 3  | 1.51 | 0.50 | 5.58 |
| 3 | 1 | 9 | 1 | 6 | 12.80 | 1.76 | 18.09 | 9  | 5.95 | 0.66 | 7.40 |
| 3 | 1 | 9 | 1 | 7 | 8.40  | 1.75 | 8.78  | 4  | 2.04 | 0.51 | 4.62 |
| 3 | 1 | 9 | 1 | 8 | 8.20  | 1.40 | 4.73  | 2  | 0.58 | 0.29 | 2.86 |
| 3 | 1 | 9 | 2 | 1 | 11.00 | 2.04 | 15.14 | 8  | 4.64 | 0.58 | 5.78 |
| 3 | 1 | 9 | 2 | 2 | 9.10  | 1.95 | 12.12 | 7  | 3.60 | 0.51 | 4.44 |
| 3 | 1 | 9 | 2 | 3 | 8.50  | 1.90 | 8.48  | 4  | 2.46 | 0.62 | 3.90 |
| 3 | 1 | 9 | 2 | 4 | 12.00 | 2.15 | 20.26 | 9  | 6.54 | 0.73 | 9.17 |
| 3 | 1 | 9 | 2 | 5 | 9.90  | 1.80 | 9.77  | 3  | 1.85 | 0.62 | 5.70 |
| 3 | 1 | 9 | 2 | 6 | 8.50  | 2.06 | 10.96 | 6  | 3.60 | 0.60 | 4.48 |
| 3 | 1 | 9 | 2 | 7 | 10.50 | 1.95 | 12.66 | 4  | 2.40 | 0.60 | 6.88 |
| 3 | 1 | 9 | 2 | 8 | 9.60  | 1.70 | 10.46 | 6  | 2.95 | 0.49 | 5.98 |
| 3 | 1 | 9 | 3 | 1 | 9.80  | 1.99 | 13.22 | 7  | 4.44 | 0.63 | 5.22 |
| 3 | 1 | 9 | 3 | 2 | 12.60 | 1.65 | 18.64 | 10 | 5.08 | 0.51 | 8.54 |
| 3 | 1 | 9 | 3 | 3 | 9.60  | 1.80 | 9.84  | 5  | 1.90 | 0.38 | 4.28 |
| 3 | 1 | 9 | 3 | 4 | 11.80 | 1.80 | 10.69 | 4  | 1.39 | 0.35 | 4.66 |
| 3 | 1 | 9 | 3 | 5 | 7.70  | 1.95 | 9.10  | 3  | 2.53 | 0.84 | 4.11 |
| 3 | 1 | 9 | 3 | 6 | 8.20  | 1.93 | 4.85  | 2  | 0.42 | 0.21 | 2.20 |
| 3 | 1 | 9 | 3 | 7 | 7.10  | 2.09 | 9.37  | 4  | 3.01 | 0.75 | 4.18 |
| 3 | 1 | 9 | 3 | 8 | 5.90  | 1.75 | 5.28  | 3  | 1.31 | 0.44 | 2.42 |
| 3 | 1 | 6 | 1 | 1 | 8.30  | 1.71 | 6.43  | 3  | 1.77 | 0.59 | 2.25 |
| 3 | 1 | 6 | 1 | 2 | 12.20 | 1.75 | 8.92  | 5  | 3.07 | 0.61 | 3.22 |
| 3 | 1 | 6 | 1 | 3 | 18.20 | 2.00 | 19.30 | 10 | 6.48 | 0.65 | 7.93 |
| 3 | 1 | 6 | 1 | 4 | 13.20 | 1.75 | 11.60 | 7  | 5.29 | 0.76 | 8.30 |
| 3 | 1 | 6 | 1 | 5 | 13.30 | 1.75 | 12.25 | 8  | 4.91 | 0.61 | 2.83 |
| 3 | 1 | 6 | 1 | 6 | 16.70 | 1.99 | 14.25 | 8  | 5.72 | 0.72 | 4.15 |

|   |   |   |   |   |       |      |       |    |      |      |       |
|---|---|---|---|---|-------|------|-------|----|------|------|-------|
| 3 | 1 | 6 | 1 | 7 | 18.30 | 1.70 | 21.13 | 14 | 8.76 | 0.63 | 6.25  |
| 3 | 1 | 6 | 1 | 8 | 6.60  | 1.70 | 4.25  | 3  | 1.46 | 0.49 | 2.82  |
| 3 | 1 | 6 | 2 | 1 | 11.10 | 1.84 | 10.35 | 6  | 3.79 | 0.63 | 3.22  |
| 3 | 1 | 6 | 2 | 2 | 15.80 | 2.00 | 15.47 | 9  | 6.10 | 0.68 | 4.11  |
| 3 | 1 | 6 | 2 | 3 | 11.00 | 1.95 | 11.67 | 6  | 4.33 | 0.72 | 4.17  |
| 3 | 1 | 6 | 2 | 4 | 10.40 | 2.00 | 6.72  | 6  | 1.02 | 0.17 | 2.23  |
| 3 | 1 | 6 | 2 | 5 | 16.00 | 1.71 | 15.43 | 7  | 5.38 | 0.77 | 4.57  |
| 3 | 1 | 6 | 2 | 6 | 10.20 | 1.64 | 7.43  | 4  | 4.27 | 1.07 | 2.33  |
| 3 | 1 | 6 | 2 | 7 | 14.00 | 1.75 | 14.51 | 7  | 4.56 | 0.65 | 4.30  |
| 3 | 1 | 6 | 2 | 8 | 14.10 | 1.55 | 14.28 | 9  | 5.61 | 0.62 | 5.57  |
| 3 | 1 | 6 | 3 | 1 | 13.50 | 1.94 | 11.37 | 5  | 2.89 | 0.58 | 3.23  |
| 3 | 1 | 6 | 3 | 2 | 18.50 | 1.99 | 14.77 | 11 | 8.09 | 0.74 | 6.55  |
| 3 | 1 | 6 | 3 | 3 | 14.30 | 1.85 | 12.84 | 7  | 4.13 | 0.59 | 3.83  |
| 3 | 1 | 6 | 3 | 4 | 11.90 | 1.83 | 11.33 | 5  | 3.00 | 0.60 | 2.86  |
| 3 | 1 | 6 | 3 | 5 | 14.20 | 1.80 | 12.03 | 6  | 2.95 | 0.49 | 3.98  |
| 3 | 1 | 6 | 3 | 6 | 12.50 | 1.80 | 11.69 | 6  | 4.51 | 0.75 | 3.20  |
| 3 | 1 | 6 | 3 | 7 | 12.50 | 1.75 | 13.16 | 8  | 5.24 | 0.66 | 4.41  |
| 3 | 1 | 6 | 3 | 8 | 15.60 | 1.80 | 15.45 | 5  | 3.12 | 0.62 | 7.86  |
| 3 | 1 | 7 | 1 | 1 | 17.00 | 2.04 | 17.73 | 9  | 4.83 | 0.54 | 8.77  |
| 3 | 1 | 7 | 1 | 2 | 14.10 | 1.90 | 10.51 | 4  | 1.53 | 0.38 | 3.23  |
| 3 | 1 | 7 | 1 | 3 | 13.80 | 2.00 | 12.97 | 5  | 2.40 | 0.48 | 6.08  |
| 3 | 1 | 7 | 1 | 4 | 15.90 | 1.99 | 14.39 | 7  | 3.56 | 0.51 | 6.06  |
| 3 | 1 | 7 | 1 | 5 | 16.00 | 1.99 | 16.07 | 8  | 4.27 | 0.53 | 6.04  |
| 3 | 1 | 7 | 1 | 6 | 13.70 | 1.85 | 11.15 | 7  | 3.89 | 0.56 | 3.58  |
| 3 | 1 | 7 | 1 | 7 | 18.10 | 1.89 | 19.43 | 13 | 6.58 | 0.51 | 10.96 |
| 3 | 1 | 7 | 1 | 8 | 11.40 | 2.50 | 17.08 | 6  | 4.06 | 0.68 | 7.88  |
| 3 | 1 | 7 | 2 | 1 | 15.30 | 2.28 | 18.68 | 9  | 6.05 | 0.67 | 9.07  |
| 3 | 1 | 7 | 2 | 2 | 14.40 | 1.96 | 15.56 | 6  | 3.95 | 0.66 | 6.68  |
| 3 | 1 | 7 | 2 | 3 | 13.90 | 1.80 | 11.09 | 7  | 3.45 | 0.49 | 4.49  |
| 3 | 1 | 7 | 2 | 4 | 10.30 | 1.83 | 7.35  | 3  | 1.56 | 0.52 | 6.68  |
| 3 | 1 | 7 | 2 | 5 | 17.10 | 2.15 | 21.71 | 11 | 7.75 | 0.70 | 8.72  |
| 3 | 1 | 7 | 2 | 6 | 10.70 | 1.74 | 8.33  | 4  | 2.51 | 0.63 | 4.53  |
| 3 | 1 | 7 | 2 | 7 | 13.00 | 1.74 | 11.07 | 5  | 3.11 | 0.62 | 5.58  |
| 3 | 1 | 7 | 2 | 8 | 11.80 | 1.65 | 8.50  | 3  | 1.71 | 0.57 | 4.29  |
| 3 | 1 | 7 | 3 | 1 | 19.00 | 2.00 | 17.38 | 10 | 5.45 | 0.55 | 6.97  |
| 3 | 1 | 7 | 3 | 2 | 14.40 | 1.89 | 16.21 | 10 | 5.52 | 0.55 | 6.62  |

|   |   |   |   |   |       |      |       |    |      |      |       |
|---|---|---|---|---|-------|------|-------|----|------|------|-------|
| 3 | 1 | 7 | 3 | 3 | 10.80 | 1.95 | 10.88 | 5  | 3.10 | 0.62 | 4.88  |
| 3 | 1 | 7 | 3 | 4 | 11.90 | 2.10 | 11.30 | 5  | 2.91 | 0.58 | 4.09  |
| 3 | 1 | 7 | 3 | 5 | 18.20 | 2.14 | 15.23 | 8  | 4.27 | 0.53 | 4.60  |
| 3 | 1 | 7 | 3 | 6 | 17.50 | 1.95 | 15.95 | 9  | 3.69 | 0.41 | 5.71  |
| 3 | 1 | 7 | 3 | 7 | 19.70 | 2.14 | 28.14 | 13 | 8.10 | 0.62 | 10.59 |
| 3 | 1 | 7 | 3 | 8 | 14.00 | 1.89 | 14.90 | 10 | 5.44 | 0.54 | 5.72  |
| 3 | 1 | 4 | 1 | 1 | 14.00 | 1.91 | 14.59 | 7  | 4.76 | 0.68 | 5.60  |
| 3 | 1 | 4 | 1 | 2 | 9.80  | 1.95 | 16.61 | 5  | 3.39 | 0.68 | 4.08  |
| 3 | 1 | 4 | 1 | 3 | 12.20 | 2.00 | 12.31 | 7  | 2.86 | 0.41 | 4.56  |
| 3 | 1 | 4 | 1 | 4 | 10.80 | 1.96 | 10.78 | 5  | 3.62 | 0.72 | 4.44  |
| 3 | 1 | 4 | 1 | 5 | 11.00 | 2.15 | 11.41 | 4  | 2.02 | 0.51 | 3.16  |
| 3 | 1 | 4 | 1 | 6 | 8.80  | 1.73 | 8.98  | 7  | 3.18 | 0.45 | 6.15  |
| 3 | 1 | 4 | 1 | 7 | 10.80 | 2.03 | 11.99 | 4  | 1.33 | 0.33 | 4.12  |
| 3 | 1 | 4 | 1 | 8 | 9.20  | 1.70 | 9.75  | 4  | 2.36 | 0.59 | 1.88  |
| 3 | 1 | 4 | 2 | 1 | 13.30 | 2.05 | 16.89 | 11 | 6.20 | 0.56 | 9.30  |
| 3 | 1 | 4 | 2 | 2 | 19.90 | 1.76 | 27.20 | 7  | 2.82 | 0.40 | 8.34  |
| 3 | 1 | 4 | 2 | 3 | 14.80 | 2.05 | 16.24 | 7  | 2.71 | 0.39 | 7.75  |
| 3 | 1 | 4 | 2 | 4 | 14.90 | 2.01 | 16.60 | 9  | 3.07 | 0.34 | 6.64  |
| 3 | 1 | 4 | 2 | 5 | 8.10  | 2.11 | 8.43  | 4  | 1.69 | 0.42 | 4.06  |
| 3 | 1 | 4 | 2 | 6 | 11.70 | 2.19 | 12.19 | 6  | 2.83 | 0.47 | 5.59  |
| 3 | 1 | 4 | 2 | 7 | 11.20 | 1.95 | 11.44 | 6  | 2.75 | 0.46 | 5.52  |
| 3 | 1 | 4 | 2 | 8 | 12.10 | 1.91 | 12.41 | 5  | 2.60 | 0.52 | 4.65  |
| 3 | 1 | 4 | 3 | 1 | 16.40 | 2.00 | 14.90 | 5  | 2.24 | 0.45 | 6.18  |
| 3 | 1 | 4 | 3 | 2 | 16.40 | 2.10 | 21.18 | 10 | 2.88 | 0.29 | 9.49  |
| 3 | 1 | 4 | 3 | 3 | 16.30 | 2.19 | 21.23 | 9  | 5.10 | 0.57 | 9.56  |
| 3 | 1 | 4 | 3 | 4 | 10.50 | 1.90 | 13.10 | 7  | 3.65 | 0.52 | 5.54  |
| 3 | 1 | 4 | 3 | 5 | 10.80 | 1.85 | 11.60 | 6  | 3.63 | 0.61 | 5.33  |
| 3 | 1 | 4 | 3 | 6 | 13.30 | 1.88 | 17.60 | 9  | 4.87 | 0.54 | 6.96  |
| 3 | 1 | 4 | 3 | 7 | 12.20 | 1.75 | 11.35 | 6  | 2.20 | 0.37 | 5.42  |
| 3 | 1 | 4 | 3 | 8 | 11.50 | 1.75 | 10.85 | 5  | 2.34 | 0.47 | 6.18  |
| 3 | 1 | 5 | 1 | 1 | 11.70 | 1.85 | 10.15 | 6  | 4.09 | 0.68 | 4.87  |
| 3 | 1 | 5 | 1 | 2 | 13.20 | 1.80 | 10.68 | 4  | 3.07 | 0.77 | 4.89  |
| 3 | 1 | 5 | 1 | 3 | 14.80 | 1.85 | 12.13 | 9  | 6.71 | 0.75 | 4.11  |
| 3 | 1 | 5 | 1 | 4 | 15.30 | 1.50 | 15.12 | 4  | 2.49 | 0.62 | 2.21  |
| 3 | 1 | 5 | 1 | 5 | 17.90 | 1.85 | 17.71 | 6  | 3.80 | 0.63 | 5.70  |
| 3 | 1 | 5 | 1 | 6 | 11.50 | 2.34 | 10.91 | 8  | 5.98 | 0.75 | 7.53  |

|   |   |   |   |   |       |      |       |    |      |      |      |
|---|---|---|---|---|-------|------|-------|----|------|------|------|
| 3 | 1 | 5 | 1 | 7 | 13.00 | 1.85 | 11.85 | 6  | 4.14 | 0.69 | 4.30 |
| 3 | 1 | 5 | 1 | 8 | 9.00  | 1.80 | 7.08  | 10 | 6.30 | 0.63 | 8.69 |
| 3 | 1 | 5 | 2 | 1 | 14.00 | 1.75 | 12.29 | 8  | 4.97 | 0.62 | 4.82 |
| 3 | 1 | 5 | 2 | 2 | 13.00 | 1.84 | 12.50 | 6  | 4.57 | 0.76 | 5.70 |
| 3 | 1 | 5 | 2 | 3 | 15.60 | 1.75 | 16.57 | 9  | 6.02 | 0.67 | 6.15 |
| 3 | 1 | 5 | 2 | 4 | 14.20 | 1.79 | 10.83 | 5  | 3.65 | 0.73 | 5.18 |
| 3 | 1 | 5 | 2 | 5 | 17.00 | 1.76 | 18.40 | 11 | 6.64 | 0.60 | 7.48 |
| 3 | 1 | 5 | 2 | 6 | 18.40 | 1.80 | 16.81 | 10 | 6.47 | 0.65 | 7.04 |
| 3 | 1 | 5 | 2 | 7 | 9.90  | 1.76 | 9.12  | 5  | 3.60 | 0.72 | 3.37 |
| 3 | 1 | 5 | 2 | 8 | 8.30  | 1.66 | 7.25  | 4  | 2.97 | 0.74 | 3.48 |
| 3 | 1 | 5 | 3 | 1 | 18.10 | 1.90 | 19.84 | 10 | 7.60 | 0.76 | 7.94 |
| 3 | 1 | 5 | 3 | 2 | 18.80 | 1.76 | 21.43 | 11 | 6.79 | 0.62 | 9.27 |
| 3 | 1 | 5 | 3 | 3 | 17.20 | 1.70 | 16.99 | 9  | 5.78 | 0.64 | 6.99 |
| 3 | 1 | 5 | 3 | 4 | 16.50 | 1.74 | 17.06 | 7  | 5.03 | 0.72 | 7.56 |
| 3 | 1 | 5 | 3 | 5 | 13.80 | 1.80 | 12.98 | 8  | 4.59 | 0.57 | 5.67 |
| 3 | 1 | 5 | 3 | 6 | 13.60 | 1.71 | 12.28 | 8  | 4.88 | 0.61 | 4.94 |
| 3 | 1 | 5 | 3 | 7 | 13.10 | 1.85 | 12.78 | 6  | 3.17 | 0.53 | 5.74 |
| 3 | 1 | 5 | 3 | 8 | 9.10  | 1.75 | 6.33  | 2  | 1.30 | 0.65 | 3.11 |
| 3 | 1 | 1 | 1 | 1 | 24.10 | 1.97 | 26.35 | 12 | 9.51 | 0.79 | 9.25 |
| 3 | 1 | 1 | 1 | 2 | 16.10 | 1.57 | 16.33 | 11 | 6.40 | 0.58 | 5.80 |
| 3 | 1 | 1 | 1 | 3 | 14.80 | 1.80 | 18.29 | 10 | 6.19 | 0.62 | 6.45 |
| 3 | 1 | 1 | 1 | 4 | 14.40 | 1.25 | 12.45 | 9  | 5.46 | 0.61 | 4.51 |
| 3 | 1 | 1 | 1 | 5 | 12.40 | 1.62 | 10.77 | 4  | 2.73 | 0.68 | 4.28 |
| 3 | 1 | 1 | 1 | 6 | 19.40 | 1.86 | 25.06 | 12 | 9.86 | 0.82 | 7.00 |
| 3 | 1 | 1 | 1 | 7 | 11.40 | 1.58 | 12.03 | 5  | 3.70 | 0.74 | 3.81 |
| 3 | 1 | 1 | 1 | 8 | 16.60 | 1.85 | 14.98 | 11 | 7.25 | 0.66 | 5.80 |
| 3 | 1 | 1 | 2 | 1 | 14.40 | 1.37 | 14.01 | 7  | 4.94 | 0.71 | 5.27 |
| 3 | 1 | 1 | 2 | 2 | 14.20 | 1.67 | 19.75 | 12 | 7.78 | 0.65 | 5.93 |
| 3 | 1 | 1 | 2 | 3 | 13.50 | 1.92 | 14.67 | 7  | 5.16 | 0.74 | 5.09 |
| 3 | 1 | 1 | 2 | 4 | 14.40 | 2.00 | 18.71 | 9  | 6.47 | 0.72 | 6.06 |
| 3 | 1 | 1 | 2 | 5 | 15.90 | 1.53 | 18.10 | 11 | 7.91 | 0.72 | 6.47 |
| 3 | 1 | 1 | 2 | 6 | 13.60 | 1.78 | 14.88 | 8  | 5.57 | 0.70 | 5.66 |
| 3 | 1 | 1 | 2 | 7 | 14.20 | 1.67 | 17.05 | 8  | 5.98 | 0.75 | 5.74 |
| 3 | 1 | 1 | 2 | 8 | 13.10 | 1.80 | 14.95 | 8  | 5.41 | 0.68 | 5.52 |
| 3 | 1 | 1 | 3 | 1 | 14.50 | 1.69 | 16.76 | 7  | 4.86 | 0.69 | 6.87 |
| 3 | 1 | 1 | 3 | 2 | 14.20 | 1.63 | 18.27 | 10 | 6.87 | 0.69 | 5.55 |

|   |   |    |   |   |       |      |       |    |      |      |       |
|---|---|----|---|---|-------|------|-------|----|------|------|-------|
| 3 | 1 | 1  | 3 | 3 | 12.90 | 2.11 | 14.00 | 7  | 4.95 | 0.71 | 4.68  |
| 3 | 1 | 1  | 3 | 4 | 14.90 | 1.60 | 15.94 | 10 | 6.41 | 0.64 | 5.01  |
| 3 | 1 | 1  | 3 | 5 | 17.20 | 1.56 | 21.09 | 10 | 8.40 | 0.84 | 5.45  |
| 3 | 1 | 1  | 3 | 6 | 14.30 | 1.83 | 17.32 | 8  | 5.98 | 0.75 | 6.42  |
| 3 | 1 | 1  | 3 | 7 | 17.20 | 1.70 | 16.46 | 8  | 5.72 | 0.72 | 6.64  |
| 3 | 1 | 1  | 3 | 8 | 13.80 | 1.69 | 15.87 | 8  | 5.48 | 0.69 | 4.61  |
| 3 | 1 | 3  | 1 | 1 | 15.50 | 2.01 | 24.55 | 9  | 6.21 | 0.69 | 10.73 |
| 3 | 1 | 3  | 1 | 2 | 15.60 | 2.05 | 23.08 | 11 | 6.99 | 0.64 | 9.58  |
| 3 | 1 | 3  | 1 | 3 | 16.70 | 2.06 | 25.94 | 12 | 9.19 | 0.77 | 10.06 |
| 3 | 1 | 3  | 1 | 4 | 20.80 | 2.06 | 32.48 | 13 | 8.95 | 0.69 | 13.74 |
| 3 | 1 | 3  | 1 | 5 | 14.00 | 2.05 | 17.18 | 7  | 5.52 | 0.79 | 8.80  |
| 3 | 1 | 3  | 1 | 6 | 13.00 | 1.85 | 18.11 | 7  | 5.08 | 0.73 | 12.56 |
| 3 | 1 | 3  | 1 | 7 | 17.40 | 1.96 | 25.16 | 10 | 7.08 | 0.71 | 6.61  |
| 3 | 1 | 3  | 1 | 8 | 15.50 | 2.00 | 21.27 | 10 | 7.05 | 0.71 | 8.68  |
| 3 | 1 | 3  | 2 | 1 | 17.20 | 1.95 | 22.26 | 11 | 4.34 | 0.39 | 10.15 |
| 3 | 1 | 3  | 2 | 2 | 16.40 | 2.01 | 24.61 | 11 | 6.19 | 0.56 | 10.74 |
| 3 | 1 | 3  | 2 | 3 | 15.30 | 1.90 | 20.68 | 7  | 4.13 | 0.59 | 10.76 |
| 3 | 1 | 3  | 2 | 4 | 14.40 | 2.05 | 19.64 | 11 | 6.02 | 0.55 | 9.06  |
| 3 | 1 | 3  | 2 | 5 | 16.80 | 2.04 | 23.94 | 11 | 4.93 | 0.45 | 11.42 |
| 3 | 1 | 3  | 2 | 6 | 14.50 | 2.00 | 19.02 | 8  | 5.17 | 0.65 | 7.39  |
| 3 | 1 | 3  | 2 | 7 | 14.20 | 2.04 | 20.57 | 9  | 4.25 | 0.47 | 9.42  |
| 3 | 1 | 3  | 2 | 8 | 13.00 | 2.14 | 20.08 | 8  | 4.84 | 0.61 | 10.52 |
| 3 | 1 | 3  | 3 | 1 | 15.40 | 1.96 | 24.65 | 11 | 6.73 | 0.61 | 11.56 |
| 3 | 1 | 3  | 3 | 2 | 15.00 | 2.15 | 23.53 | 10 | 6.41 | 0.64 | 10.80 |
| 3 | 1 | 3  | 3 | 3 | 11.70 | 1.96 | 18.24 | 9  | 5.68 | 0.63 | 8.65  |
| 3 | 1 | 3  | 3 | 4 | 15.40 | 2.00 | 20.01 | 7  | 4.15 | 0.59 | 7.38  |
| 3 | 1 | 3  | 3 | 5 | 18.20 | 1.95 | 31.17 | 12 | 8.33 | 0.69 | 12.66 |
| 3 | 1 | 3  | 3 | 6 | 12.10 | 1.71 | 15.47 | 5  | 3.97 | 0.79 | 7.89  |
| 3 | 1 | 3  | 3 | 7 | 13.30 | 2.15 | 15.75 | 5  | 3.12 | 0.62 | 8.31  |
| 3 | 1 | 3  | 3 | 8 | 15.80 | 1.70 | 20.35 | 10 | 5.74 | 0.57 | 10.36 |
| 3 | 1 | 16 | 1 | 1 | 11.80 | 1.96 | 14.00 | 7  | 3.67 | 0.52 | 5.08  |
| 3 | 1 | 16 | 1 | 2 | 12.60 | 1.95 | 16.05 | 7  | 4.16 | 0.59 | 6.96  |
| 3 | 1 | 16 | 1 | 3 | 9.50  | 2.05 | 10.85 | 5  | 3.07 | 0.61 | 3.67  |
| 3 | 1 | 16 | 1 | 4 | 12.70 | 1.90 | 16.81 | 8  | 4.94 | 0.62 | 5.45  |
| 3 | 1 | 16 | 1 | 5 | 11.40 | 2.20 | 13.12 | 6  | 2.36 | 0.39 | 6.02  |
| 3 | 1 | 16 | 1 | 6 | 9.80  | 1.95 | 12.32 | 7  | 3.43 | 0.49 | 4.06  |

|   |   |    |   |   |       |      |       |    |      |      |       |
|---|---|----|---|---|-------|------|-------|----|------|------|-------|
| 3 | 1 | 16 | 1 | 7 | 10.10 | 1.85 | 10.87 | 6  | 2.60 | 0.43 | 3.79  |
| 3 | 1 | 16 | 1 | 8 | 11.80 | 1.85 | 12.38 | 8  | 3.31 | 0.41 | 4.75  |
| 3 | 1 | 16 | 2 | 1 | 11.60 | 2.00 | 14.82 | 9  | 5.08 | 0.56 | 5.40  |
| 3 | 1 | 16 | 2 | 2 | 12.00 | 2.10 | 13.88 | 6  | 3.60 | 0.60 | 5.97  |
| 3 | 1 | 16 | 2 | 3 | 8.90  | 1.75 | 8.75  | 6  | 2.50 | 0.42 | 3.38  |
| 3 | 1 | 16 | 2 | 4 | 9.80  | 1.95 | 13.05 | 8  | 3.81 | 0.48 | 5.20  |
| 3 | 1 | 16 | 2 | 5 | 9.90  | 1.70 | 9.30  | 5  | 2.04 | 0.41 | 3.62  |
| 3 | 1 | 16 | 2 | 6 | 10.10 | 2.06 | 10.33 | 6  | 2.89 | 0.48 | 4.03  |
| 3 | 1 | 16 | 2 | 7 | 13.00 | 1.85 | 15.95 | 9  | 5.08 | 0.56 | 5.83  |
| 3 | 1 | 16 | 2 | 8 | 6.10  | 1.56 | 6.84  | 5  | 2.14 | 0.43 | 2.46  |
| 3 | 1 | 16 | 3 | 1 | 11.00 | 2.00 | 12.61 | 5  | 3.01 | 0.60 | 4.71  |
| 3 | 1 | 16 | 3 | 2 | 13.80 | 1.90 | 14.40 | 9  | 4.01 | 0.45 | 4.95  |
| 3 | 1 | 16 | 3 | 3 | 16.20 | 1.90 | 22.30 | 14 | 8.01 | 0.57 | 7.63  |
| 3 | 1 | 16 | 3 | 4 | 11.60 | 1.95 | 14.48 | 10 | 4.11 | 0.41 | 6.01  |
| 3 | 1 | 16 | 3 | 5 | 10.40 | 1.90 | 13.45 | 7  | 4.03 | 0.58 | 4.62  |
| 3 | 1 | 16 | 3 | 6 | 11.30 | 2.00 | 12.95 | 4  | 1.80 | 0.45 | 4.22  |
| 3 | 1 | 16 | 3 | 7 | 11.40 | 1.90 | 9.51  | 4  | 1.54 | 0.39 | 2.18  |
| 3 | 1 | 16 | 3 | 8 | 13.90 | 1.90 | 18.35 | 11 | 5.36 | 0.49 | 6.75  |
| 3 | 1 | 17 | 1 | 1 | 21.30 | 2.15 | 31.54 | 13 | 9.30 | 0.72 | 12.01 |
| 3 | 1 | 17 | 1 | 2 | 14.00 | 2.00 | 17.79 | 8  | 6.79 | 0.85 | 7.20  |
| 3 | 1 | 17 | 1 | 3 | 13.60 | 2.10 | 18.95 | 7  | 5.76 | 0.82 | 7.36  |
| 3 | 1 | 17 | 1 | 4 | 11.80 | 1.95 | 13.15 | 4  | 2.92 | 0.73 | 4.71  |
| 3 | 1 | 17 | 1 | 5 | 12.10 | 1.85 | 11.39 | 3  | 2.39 | 0.80 | 5.96  |
| 3 | 1 | 17 | 1 | 6 | 12.30 | 2.15 | 15.80 | 5  | 4.29 | 0.86 | 6.74  |
| 3 | 1 | 17 | 1 | 7 | 8.70  | 2.35 | 12.98 | 5  | 4.73 | 0.95 | 5.24  |
| 3 | 1 | 17 | 1 | 8 | 8.40  | 1.85 | 17.85 | 3  | 2.09 | 0.70 | 3.36  |
| 3 | 1 | 17 | 2 | 1 | 14.60 | 2.10 | 22.87 | 9  | 7.48 | 0.83 | 8.60  |
| 3 | 1 | 17 | 2 | 2 | 14.50 | 2.10 | 20.87 | 9  | 6.85 | 0.76 | 7.79  |
| 3 | 1 | 17 | 2 | 3 | 15.40 | 2.15 | 25.58 | 9  | 8.01 | 0.89 | 10.57 |
| 3 | 1 | 17 | 2 | 4 | 17.20 | 2.26 | 27.00 | 10 | 8.48 | 0.85 | 11.75 |
| 3 | 1 | 17 | 2 | 5 | 15.20 | 2.10 | 24.90 | 10 | 8.04 | 0.80 | 9.80  |
| 3 | 1 | 17 | 2 | 6 | 13.80 | 2.25 | 18.11 | 6  | 5.23 | 0.87 | 7.20  |
| 3 | 1 | 17 | 2 | 7 | 11.20 | 2.05 | 12.58 | 4  | 2.64 | 0.66 | 6.01  |
| 3 | 1 | 17 | 2 | 8 | 11.90 | 2.30 | 13.83 | 5  | 3.30 | 0.66 | 7.32  |
| 3 | 1 | 17 | 3 | 1 | 16.20 | 2.20 | 24.58 | 9  | 7.60 | 0.84 | 9.44  |
| 3 | 1 | 17 | 3 | 2 | 12.50 | 2.15 | 15.42 | 4  | 3.83 | 0.96 | 6.62  |

|   |   |    |   |   |       |      |       |   |      |      |       |
|---|---|----|---|---|-------|------|-------|---|------|------|-------|
| 3 | 1 | 17 | 3 | 3 | 13.70 | 2.10 | 9.33  | 2 | 0.74 | 0.37 | 3.19  |
| 3 | 1 | 17 | 3 | 4 | 13.50 | 2.15 | 17.61 | 6 | 5.08 | 0.85 | 7.55  |
| 3 | 1 | 17 | 3 | 5 | 8.80  | 1.94 | 8.99  | 3 | 2.14 | 0.71 | 3.70  |
| 3 | 1 | 17 | 3 | 6 | 11.50 | 1.95 | 8.88  | 2 | 1.26 | 0.63 | 5.54  |
| 3 | 1 | 17 | 3 | 7 | 11.30 | 2.10 | 10.38 | 3 | 2.50 | 0.83 | 4.32  |
| 3 | 1 | 17 | 3 | 8 | 9.60  | 2.04 | 1.97  | 2 | 1.43 | 0.72 | 3.46  |
| 3 | 1 | 18 | 1 | 1 | 11.30 | 2.34 | 16.37 | 7 | 3.35 | 0.48 | 6.78  |
| 3 | 1 | 18 | 1 | 2 | 14.40 | 2.44 | 22.44 | 8 | 5.68 | 0.71 | 7.45  |
| 3 | 1 | 18 | 1 | 3 | 13.30 | 2.00 | 13.31 | 6 | 2.62 | 0.44 | 4.09  |
| 3 | 1 | 18 | 1 | 4 | 8.60  | 1.95 | 7.44  | 4 | 2.15 | 0.54 | 2.74  |
| 3 | 1 | 18 | 1 | 5 | 12.60 | 2.18 | 16.30 | 6 | 4.84 | 0.81 | 6.02  |
| 3 | 1 | 18 | 1 | 6 | 11.50 | 2.00 | 12.45 | 4 | 2.98 | 0.75 | 5.58  |
| 3 | 1 | 18 | 1 | 7 | 11.40 | 2.29 | 15.48 | 5 | 4.36 | 0.87 | 7.57  |
| 3 | 1 | 18 | 1 | 8 | 13.40 | 2.09 | 14.49 | 7 | 3.62 | 0.52 | 5.09  |
| 3 | 1 | 18 | 2 | 1 | 15.20 | 1.90 | 12.56 | 2 | 1.45 | 0.73 | 5.52  |
| 3 | 1 | 18 | 2 | 2 | 10.90 | 1.94 | 10.51 | 4 | 2.07 | 0.52 | 5.52  |
| 3 | 1 | 18 | 2 | 3 | 15.40 | 2.09 | 20.68 | 8 | 4.84 | 0.61 | 10.16 |
| 3 | 1 | 18 | 2 | 4 | 11.70 | 2.29 | 11.91 | 3 | 1.08 | 0.36 | 5.76  |
| 3 | 1 | 18 | 2 | 5 | 11.20 | 2.04 | 12.95 | 5 | 3.04 | 0.61 | 6.00  |
| 3 | 1 | 18 | 2 | 6 | 12.70 | 2.05 | 11.08 | 2 | 1.09 | 0.55 | 6.16  |
| 3 | 1 | 18 | 2 | 7 | 11.90 | 1.95 | 10.69 | 5 | 2.58 | 0.52 | 5.43  |
| 3 | 1 | 18 | 2 | 8 | 14.20 | 1.90 | 9.99  | 2 | 1.02 | 0.51 | 5.61  |
| 3 | 1 | 18 | 3 | 1 | 14.50 | 2.00 | 16.61 | 5 | 3.52 | 0.70 | 6.52  |
| 3 | 1 | 18 | 3 | 2 | 10.20 | 1.91 | 8.00  | 4 | 0.87 | 0.22 | 4.16  |
| 3 | 1 | 18 | 3 | 3 | 14.60 | 2.20 | 21.70 | 8 | 6.21 | 0.78 | 8.51  |
| 3 | 1 | 18 | 3 | 4 | 14.70 | 2.30 | 21.04 | 6 | 5.88 | 0.98 | 7.83  |
| 3 | 1 | 18 | 3 | 5 | 9.00  | 1.89 | 9.77  | 4 | 2.73 | 0.68 | 3.32  |
| 3 | 1 | 18 | 3 | 6 | 15.70 | 1.90 | 16.32 | 7 | 2.53 | 0.36 | 8.72  |
| 3 | 1 | 18 | 3 | 7 | 15.30 | 2.05 | 12.68 | 3 | 1.09 | 0.36 | 6.44  |
| 3 | 1 | 18 | 3 | 8 | 11.90 | 1.65 | 8.93  | 3 | 1.22 | 0.41 | 5.10  |
| 3 | 1 | 19 | 1 | 1 | 10.90 | 1.95 | 14.54 | 7 | 5.36 | 0.77 | 5.55  |
| 3 | 1 | 19 | 1 | 2 | 11.40 | 1.90 | 14.38 | 8 | 4.40 | 0.55 | 6.12  |
| 3 | 1 | 19 | 1 | 3 | 13.60 | 1.75 | 15.81 | 6 | 3.52 | 0.59 | 5.10  |
| 3 | 1 | 19 | 1 | 4 | 12.20 | 2.10 | 16.52 | 6 | 4.49 | 0.75 | 3.95  |
| 3 | 1 | 19 | 1 | 5 | 11.70 | 1.95 | 12.93 | 7 | 5.30 | 0.76 | 5.04  |
| 3 | 1 | 19 | 1 | 6 | 8.70  | 1.85 | 6.67  | 5 | 4.00 | 0.80 | 4.44  |

|   |   |    |   |   |       |      |       |   |      |      |      |
|---|---|----|---|---|-------|------|-------|---|------|------|------|
| 3 | 1 | 19 | 1 | 7 | 15.40 | 1.93 | 19.69 | 4 | 2.15 | 0.54 | 2.32 |
| 3 | 1 | 19 | 1 | 8 | 8.20  | 1.50 | 6.23  | 4 | 2.57 | 0.64 | 3.56 |
| 3 | 1 | 19 | 2 | 1 | 12.60 | 1.95 | 17.11 | 7 | 4.96 | 0.71 | 5.50 |
| 3 | 1 | 19 | 2 | 2 | 14.20 | 1.90 | 15.64 | 6 | 4.87 | 0.81 | 4.90 |
| 3 | 1 | 19 | 2 | 3 | 13.60 | 2.05 | 14.47 | 4 | 2.64 | 0.66 | 6.97 |
| 3 | 1 | 19 | 2 | 4 | 10.00 | 2.10 | 13.58 | 8 | 6.45 | 0.81 | 6.04 |
| 3 | 1 | 19 | 2 | 5 | 12.70 | 1.94 | 16.47 | 5 | 3.76 | 0.75 | 5.30 |
| 3 | 1 | 19 | 2 | 6 | 10.20 | 2.04 | 12.78 | 3 | 2.02 | 0.67 | 2.49 |
| 3 | 1 | 19 | 2 | 7 | 9.50  | 1.60 | 7.33  | 6 | 4.67 | 0.78 | 5.58 |
| 3 | 1 | 19 | 2 | 8 | 9.60  | 1.84 | 9.32  | 5 | 2.18 | 0.44 | 5.32 |
| 3 | 1 | 19 | 3 | 1 | 12.20 | 1.84 | 11.88 | 4 | 1.62 | 0.41 | 2.92 |
| 3 | 1 | 19 | 3 | 2 | 12.20 | 2.04 | 13.01 | 5 | 2.92 | 0.58 | 4.79 |
| 3 | 1 | 19 | 3 | 3 | 13.18 | 1.95 | 16.61 | 8 | 4.25 | 0.53 | 6.06 |
| 3 | 1 | 19 | 3 | 4 | 13.80 | 2.10 | 15.61 | 8 | 5.35 | 0.67 | 5.59 |
| 3 | 1 | 19 | 3 | 5 | 13.80 | 2.10 | 19.20 | 8 | 5.73 | 0.72 | 5.95 |
| 3 | 1 | 19 | 3 | 6 | 12.60 | 2.10 | 14.04 | 2 | 6.88 | 3.44 | 4.95 |
| 3 | 1 | 19 | 3 | 7 | 12.40 | 2.15 | 19.07 | 8 | 5.52 | 0.69 | 7.72 |
| 3 | 1 | 19 | 3 | 8 | 7.60  | 2.05 | 8.95  | 3 | 2.05 | 0.68 | 3.92 |
| 3 | 1 | 20 | 1 | 1 | 11.00 | 1.94 | 11.68 | 5 | 3.41 | 0.68 | 4.83 |
| 3 | 1 | 20 | 1 | 2 | 11.40 | 1.69 | 9.55  | 7 | 2.48 | 0.35 | 3.71 |
| 3 | 1 | 20 | 1 | 3 | 15.80 | 2.00 | 17.25 | 4 | 2.74 | 0.69 | 4.09 |
| 3 | 1 | 20 | 1 | 4 | 11.80 | 2.04 | 12.72 | 4 | 2.20 | 0.55 | 3.29 |
| 3 | 1 | 20 | 1 | 5 | 10.90 | 1.75 | 9.86  | 7 | 3.72 | 0.53 | 5.20 |
| 3 | 1 | 20 | 1 | 6 | 13.60 | 1.85 | 9.39  | 6 | 3.20 | 0.53 | 3.19 |
| 3 | 1 | 20 | 1 | 7 | 12.20 | 1.70 | 4.64  | 5 | 3.01 | 0.60 | 5.60 |
| 3 | 1 | 20 | 1 | 8 | 10.50 | 1.89 | 9.17  | 5 | 2.45 | 0.49 | 3.26 |
| 3 | 1 | 20 | 2 | 1 | 13.10 | 1.89 | 11.60 | 5 | 2.79 | 0.56 | 4.33 |
| 3 | 1 | 20 | 2 | 2 | 11.00 | 1.80 | 10.30 | 5 | 3.12 | 0.62 | 3.90 |
| 3 | 1 | 20 | 2 | 3 | 12.40 | 1.75 | 9.26  | 5 | 1.14 | 0.23 | 3.50 |
| 3 | 1 | 20 | 2 | 4 | 12.60 | 1.84 | 10.46 | 6 | 2.88 | 0.48 | 4.26 |
| 3 | 1 | 20 | 2 | 5 | 11.90 | 1.74 | 10.36 | 7 | 2.90 | 0.41 | 4.13 |
| 3 | 1 | 20 | 2 | 6 | 11.00 | 2.04 | 10.13 | 3 | 1.95 | 0.65 | 2.98 |
| 3 | 1 | 20 | 2 | 7 | 11.50 | 1.60 | 8.63  | 4 | 2.65 | 0.66 | 3.20 |
| 3 | 1 | 20 | 2 | 8 | 13.50 | 1.79 | 8.87  | 3 | 1.02 | 0.34 | 4.55 |
| 3 | 1 | 20 | 3 | 1 | 10.00 | 1.70 | 7.49  | 5 | 1.87 | 0.37 | 2.60 |
| 3 | 1 | 20 | 3 | 2 | 9.90  | 1.45 | 7.01  | 6 | 2.40 | 0.40 | 2.48 |



|   |   |    |   |   |       |      |      |   |      |      |      |
|---|---|----|---|---|-------|------|------|---|------|------|------|
| 3 | 1 | 20 | 3 | 3 | 10.40 | 1.65 | 7.40 | 4 | 1.60 | 0.40 | 2.04 |
| 3 | 1 | 20 | 3 | 4 | 11.60 | 1.65 | 9.52 | 7 | 3.19 | 0.46 | 2.97 |
| 3 | 1 | 20 | 3 | 5 | 8.20  | 1.80 | 6.14 | 1 | 0.60 | 0.60 | 1.38 |
| 3 | 1 | 20 | 3 | 6 | 8.50  | 1.50 | 5.80 | 4 | 1.50 | 0.38 | 1.97 |
| 3 | 1 | 20 | 3 | 7 | 10.00 | 1.35 | 3.95 | 4 | 1.86 | 0.47 | 1.97 |
| 3 | 1 | 20 | 3 | 8 | 7.20  | 1.90 | 5.37 | 3 | 1.22 | 0.41 | 1.62 |
